# Supplementary material for: New Benzoxazole Derivatives as Antiprotozoal Agents: In Silico Studies, Synthesis, and Biological Evaluation
Source: Hindawi journal article supplement (doi:10.1155/2021/6631868), 2021-03-03
Supplement: f1 [file 6631868.f1.pdf]

HEBA-4A  
 PROTON\_BSU CDC13 {C:\data} nmr 18

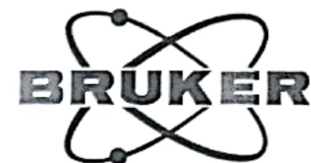

Current Data Parameters  
 NAME Mar17-2015-nmr  
 EXPNO 450  
 PROCNO 1

F2 - Acquisition Parameters  
 Date\_ 20150317  
 Time\_ 12.59  
 INSTRUM spect  
 PROBHD 5 mm PABBO BB/  
 PULPROG zg30  
 TD 65536  
 SOLVENT CDC13  
 NS 16  
 DS 2  
 SWH 8012.820 Hz  
 FIDRES 0.122266 Hz  
 AQ 4.0894465 sec  
 RG 147.93  
 DW 62.400 usec  
 DE 6.50 usec  
 TE 293.7 K  
 D1 1.00000000 sec  
 TD0 1

===== CHANNEL f1 =====  
 SFO1 400.1324710 MHz  
 NUC1 1H  
 P1 10.00 usec  
 PLW1 16.00000000 W

F2 - Processing parameters  
 SI 65536  
 SF 400.1300000 MHz  
 WDW EM  
 SSB 0  
 LB 0.10 Hz  
 GB 0  
 PC 1.00

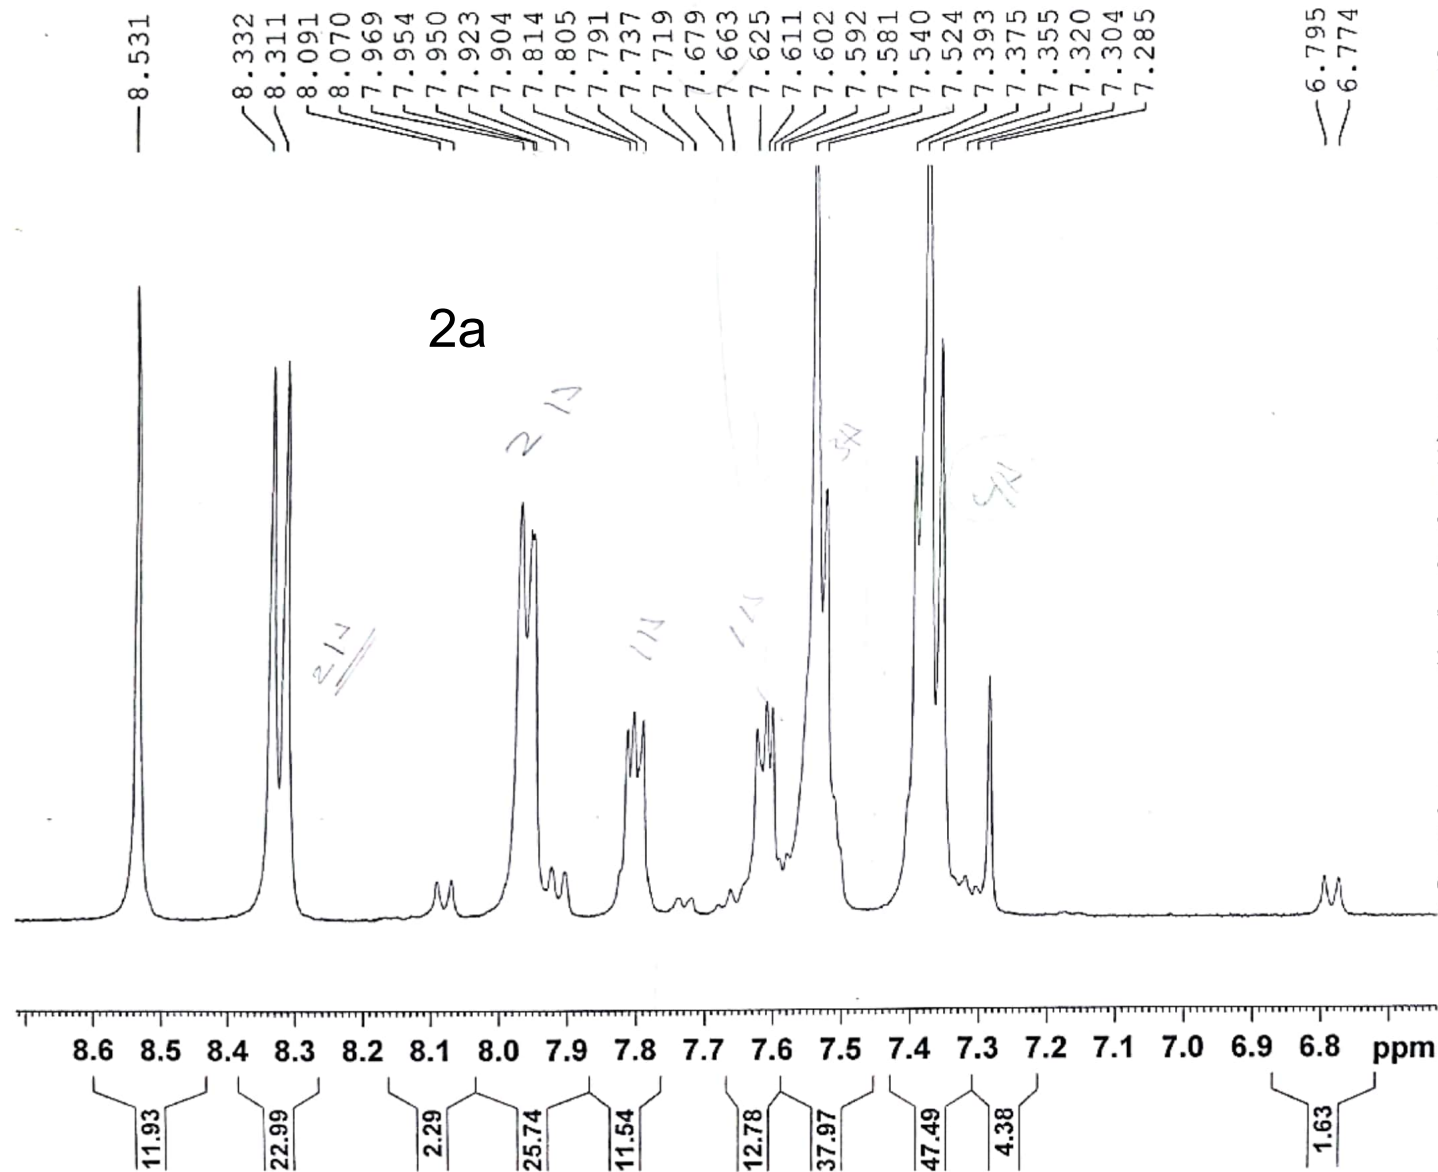

HEBA-4A  
 DEPTQ-BSU CDC13 {C:\data} nmr 21

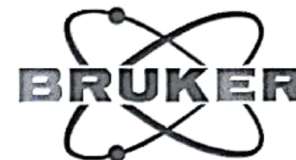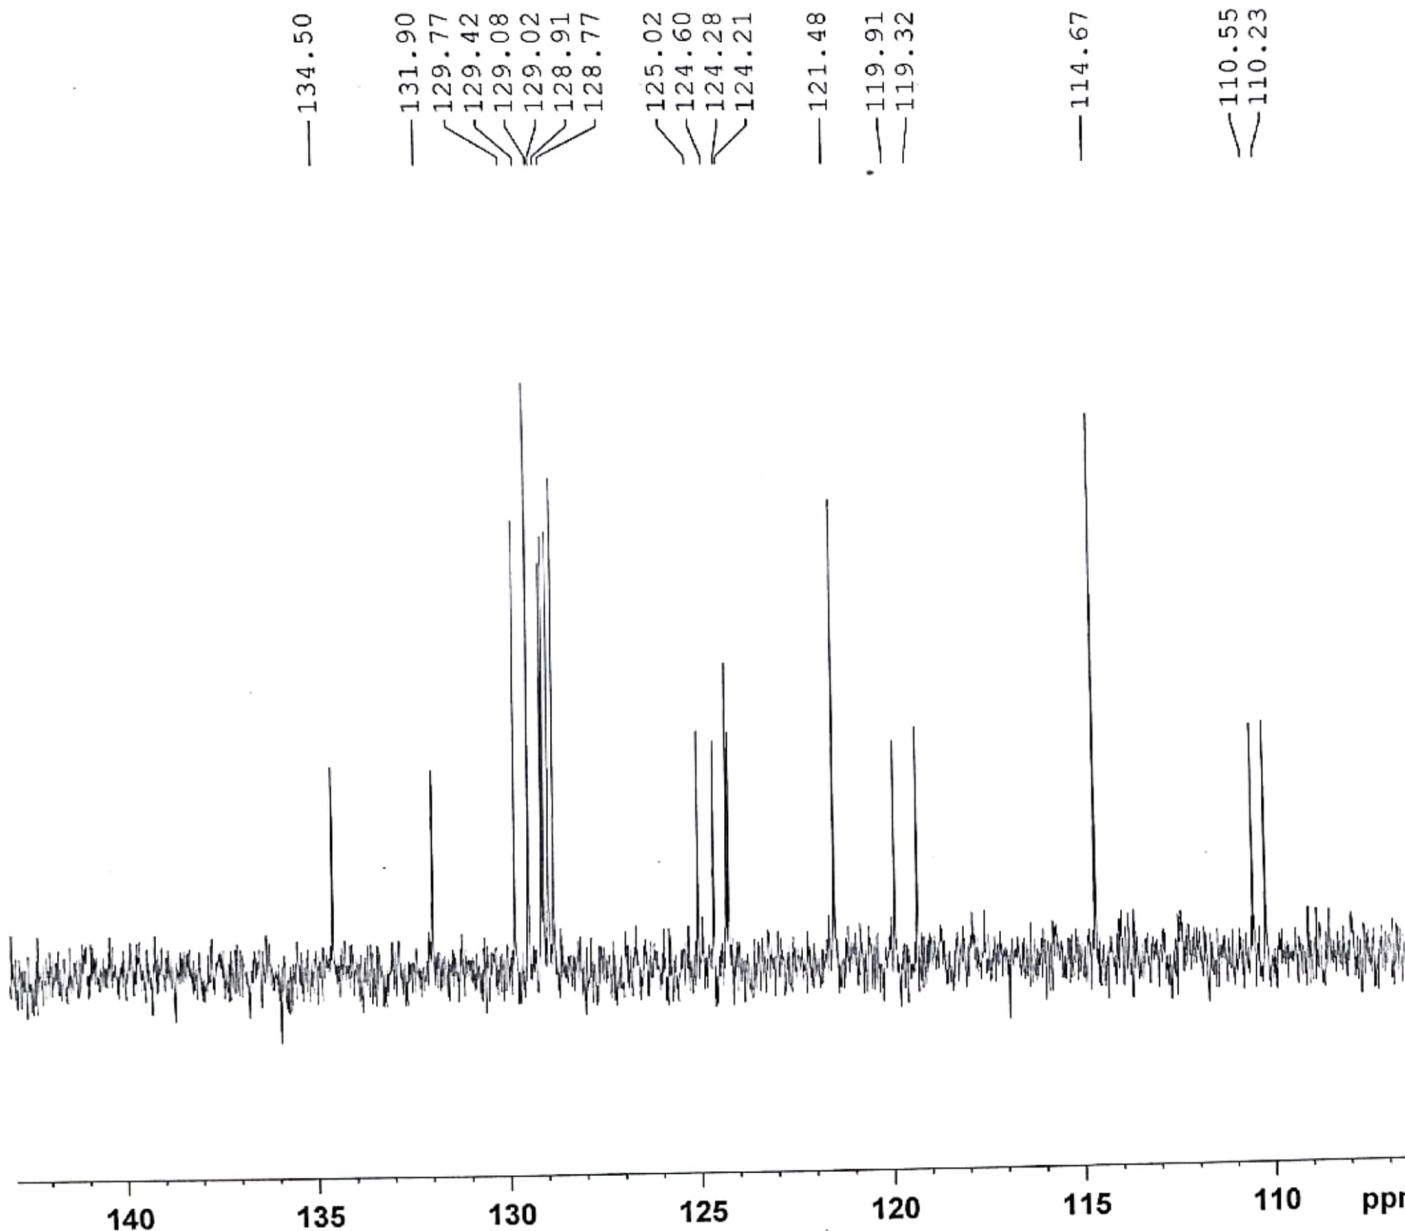

Current Data Parameters  
 NAME Mar31-2015-nmr  
 EXPNO 370  
 PROCNO 1

F2 - Acquisition Parameters  
 Date\_ 20150401  
 Time\_ 9.08  
 INSTRUM spect  
 PROBHD 5 mm PABBO BB/  
 PULPROG deptqgpgp  
 TD 65536  
 SOLVENT CDC13  
 NS 2460  
 DS 4  
 SWH 24038.461 Hz  
 FIDRES 0.366798 Hz  
 AQ 1.3631488 sec  
 RG 205.44  
 DW 20.800 usec  
 DE 6.50 usec  
 TE 294.5 K  
 CNST2 145.0000000  
 CNST12 1.5000000  
 D1 2.00000000 sec  
 D2 0.00344828 sec  
 D12 0.00002000 sec  
 D16 0.00020000 sec  
 TDO 1

----- CHANNEL f1 -----  
 SFO1 100.6228303 MHz  
 NUC1 13C  
 P1 10.00 usec  
 P13 2000.00 usec  
 PLW0 0 W  
 PLW1 66.00000000 W  
 SPNAM[5] Crp60comp.4  
 SPOALS 0.500  
 SPOFFS5 0 Hz  
 SPWS 10.08399963 W

----- CHANNEL f2 -----  
 SFO2 400.1312797 MHz  
 NUC2 1H  
 CPDPRG[2] waltr16  
 P0 15.75 usec  
 P3 10.50 usec  
 P4 21.00 usec  
 PCPD2 90.00 usec  
 PLW2 16.00000000 W  
 PLW12 0.21777999 W

----- GRADIENT CHANNEL -----  
 GPNAM[1] SMSQ10.100  
 GPNAM[2] SMSQ10.100  
 GPNAM[3] SMSQ10.100  
 GP21 31.00 %  
 GP22 31.00 %  
 GP23 31.00 %  
 P16 1000.00 usec

F2 - Processing parameters  
 SI 32768  
 SF 100.6127690 MHz  
 WDW EM  
 SSB 0  
 LE 1.00 Hz  
 GB 0  
 PC 1.40

HEBA-4B  
 PROTON\_BSU CDC13 {C:\data} nmr 20

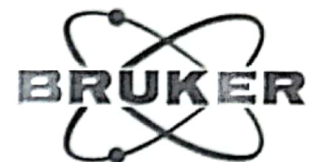

Current Data Parameters  
 NAME Mar17-2015-nmr  
 EXPNO 470  
 PROCNO 1

F2 - Acquisition Parameters  
 Date\_ 20150317  
 Time 13.08  
 INSTRUM spect  
 PROBHD 5 mm PABBO BB/  
 PULPROG zg30  
 TD 65536  
 SOLVENT CDC13  
 NS 16  
 DS 2  
 SWH 8012.820 Hz  
 FIDRES 0.122266 Hz  
 AQ 4.0894465 sec  
 RG 147.93  
 DW 62.400 usec  
 DE 6.50 usec  
 TE 293.7 K  
 DL 1.00000000 sec  
 TDO 1

----- CHANNEL f1 -----  
 SF01 400.1324710 MHz  
 NUC1 1H  
 P1 10.00 usec  
 PLW1 16.00000000 W

F2 - Processing parameters  
 SI 65536  
 SF 400.1300000 MHz  
 WDW EM  
 SSB 0  
 LB 0.10 Hz  
 GB 0  
 PC 1.00

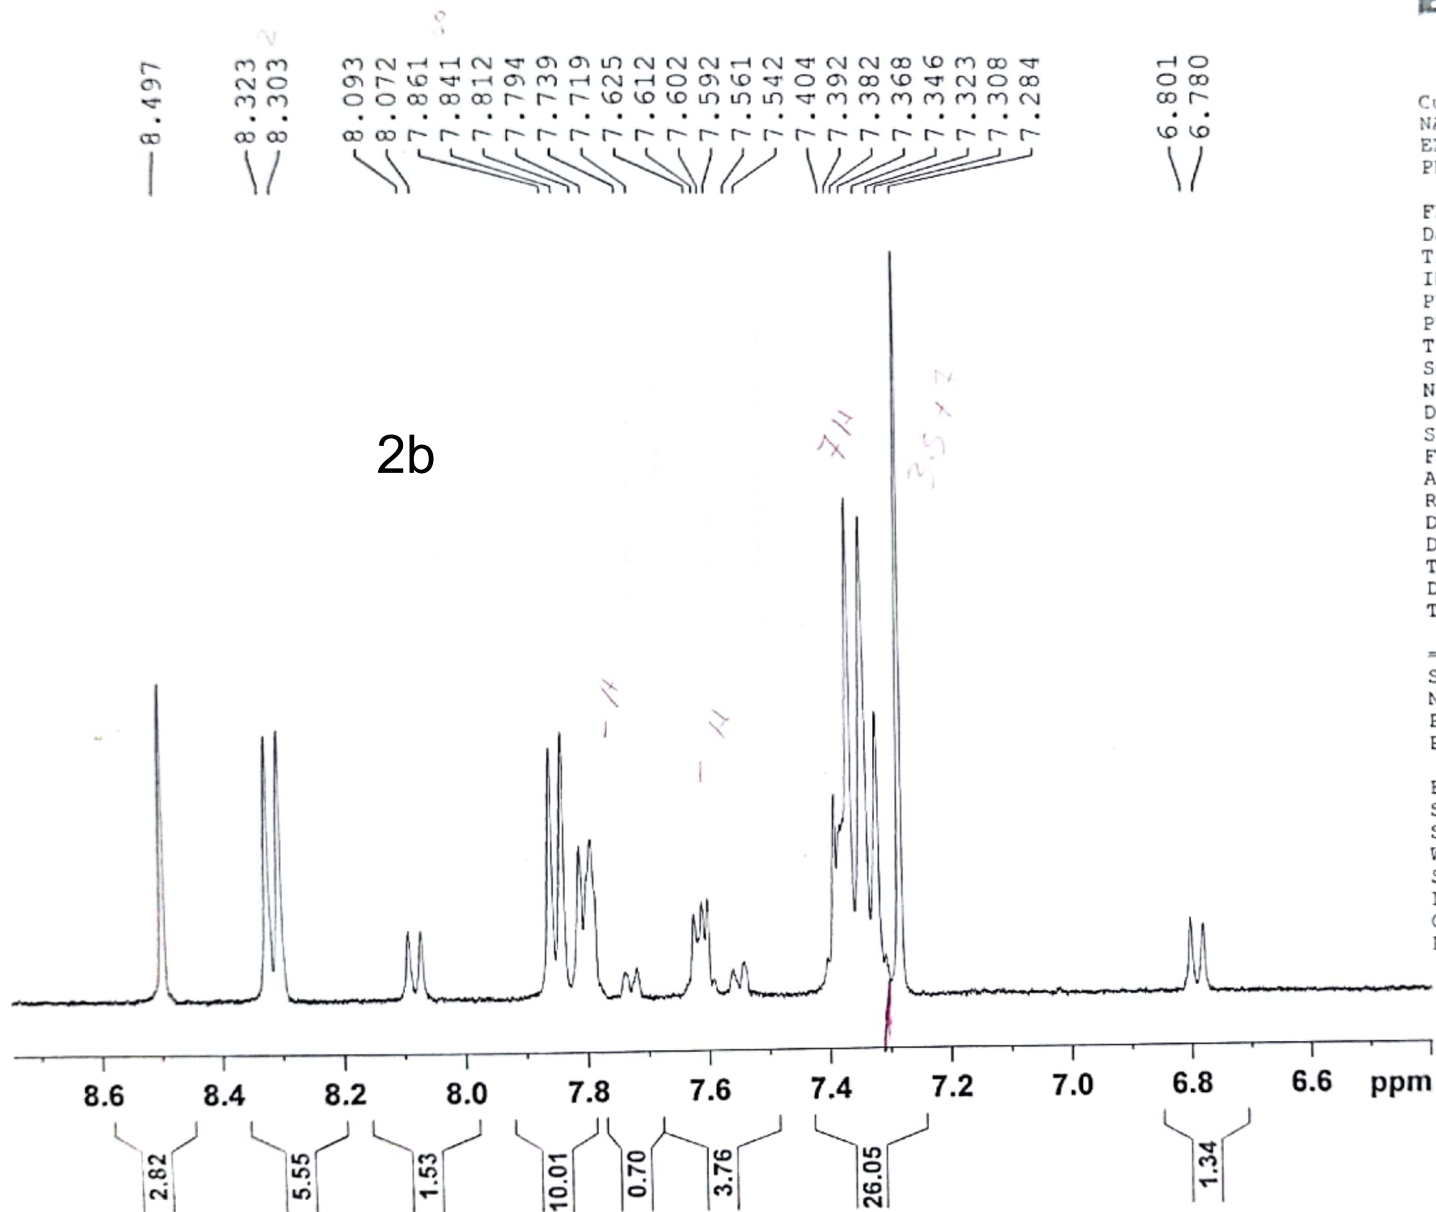

HEBA-4B  
 DEPTQ-BSU CDC13 {C:\data} nmr 19

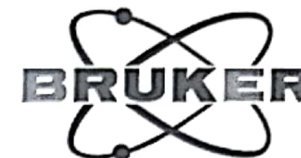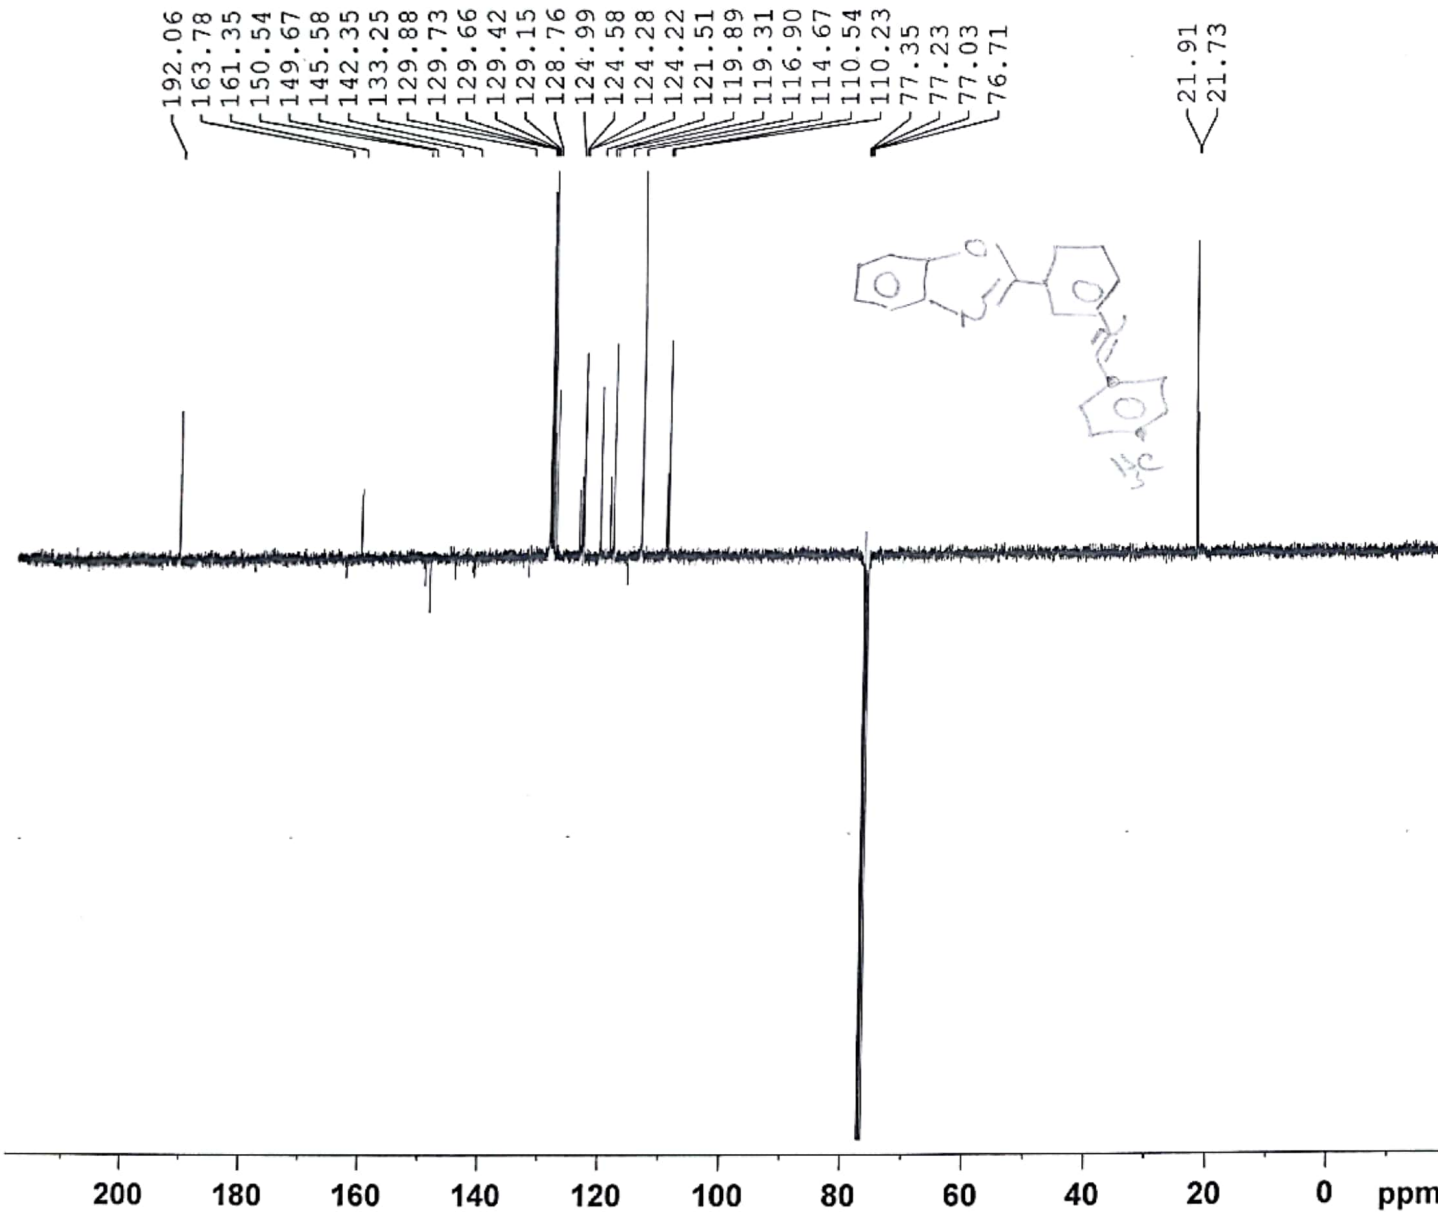

192.06  
 163.78  
 161.35  
 150.54  
 149.67  
 145.58  
 142.35  
 133.25  
 129.88  
 129.73  
 129.66  
 129.42  
 129.15  
 128.76  
 124.99  
 124.58  
 124.28  
 124.22  
 121.51  
 119.89  
 119.31  
 116.90  
 114.67  
 110.54  
 110.23  
 77.35  
 77.23  
 77.03  
 76.71

21.91  
 21.73

Current Data Parameters  
 NAME Apr30-2015-nmr  
 EXPNO 390  
 PROCNO 1

F2 - Acquisition Parameters  
 Date\_ 20150502  
 Time 9.21  
 INSTRUM spect  
 PROBHD 5 mm PABBO BB/  
 PULPROG deptgpgp  
 TD 65536  
 SOLVENT CDC13  
 NS 4000  
 DS 4  
 SWH 24038.461 Hz  
 FIDRES 0.366798 Hz  
 AQ 1.3631488 sec  
 RG 205.44  
 DW 20.800 usec  
 DE 6.50 usec  
 TE 295.2 K  
 CNST2 145.000000  
 CNST12 1.500000  
 D1 2.0000000 sec  
 D2 0.00344828 sec  
 D12 0.00002000 sec  
 D16 0.00020000 sec  
 TDD 1

==== CHANNEL f1 =====  
 SFO1 100.6228303 MHz  
 NUC1 13C  
 P1 10.00 usec  
 P13 2000.00 usec  
 PLW0 0 W  
 PLW1 66.00000000 W  
 SPNAM[5] Crp60comp.4  
 SFOALS 0.500  
 SPOFFS5 0 Hz  
 SPW5 10.08399963 W

==== CHANNEL f2 =====  
 SFO2 400.1312797 MHz  
 NUC2 1H  
 CPDPRG[2] waltz16  
 F0 15.75 usec  
 P3 10.50 usec  
 P4 21.00 usec  
 PCPD2 90.00 usec  
 PLW2 16.00000000 W  
 PLW12 0.21777999 W

==== GRADIENT CHANNEL =====  
 GPNAM[1] SMSQ10.100  
 GPNAM[2] SMSQ10.100  
 GPNAM[3] SMSQ10.100  
 GPZ1 31.00 t  
 GPZ2 31.00 t  
 GPZ3 31.00 t  
 P16 1000.00 usec

F2 - Processing parameters  
 SI 32768  
 SF 100.6127690 MHz  
 WDW EM  
 SSB 0  
 LB 1.00 Hz  
 GB 0  
 FC 1.40

HEBA-4C

PROTON\_BSU CDC13 {C:\data} nmr 5

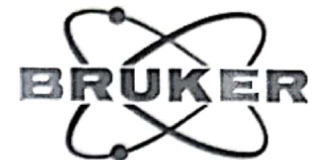

8.496  
8.330  
8.309  
7.981  
7.967  
7.961  
7.947  
7.812  
7.804  
7.790  
7.626  
7.612  
7.603  
7.396  
7.387  
7.373  
7.363  
7.342  
7.284  
7.234  
7.213  
7.192  
6.799  
6.777

Current Data Parameters  
NAME Mar05-2015-nmr  
EXPNO 280  
PROCNO 1

F2 - Acquisition Parameters  
Date\_ 20150305  
Time\_ 12.36  
INSTRUM spect  
PROBHD 5 mm PABBO BB/  
PULPROG zg30  
TD 65536  
SOLVENT CDC13  
NS 16  
DS 2  
SWH 8012.820 Hz  
FIDRES 0.122266 Hz  
AQ 4.0894465 sec  
RG 147.93  
DW 62.400 usec  
DE 6.50 usec  
TE 293.8 K  
D1 1.00000000 sec  
TD0 1

==== CHANNEL f1 =====  
SF01 400.1324710 MHz  
NUC1 1H  
P1 10.00 usec  
PLW1 16.00000000 W

F2 - Processing parameters  
SI 65536  
SF 400.1300000 MHz  
WDW EM  
SSB 0  
LB 0.10 Hz  
GB 0  
PC 1.00

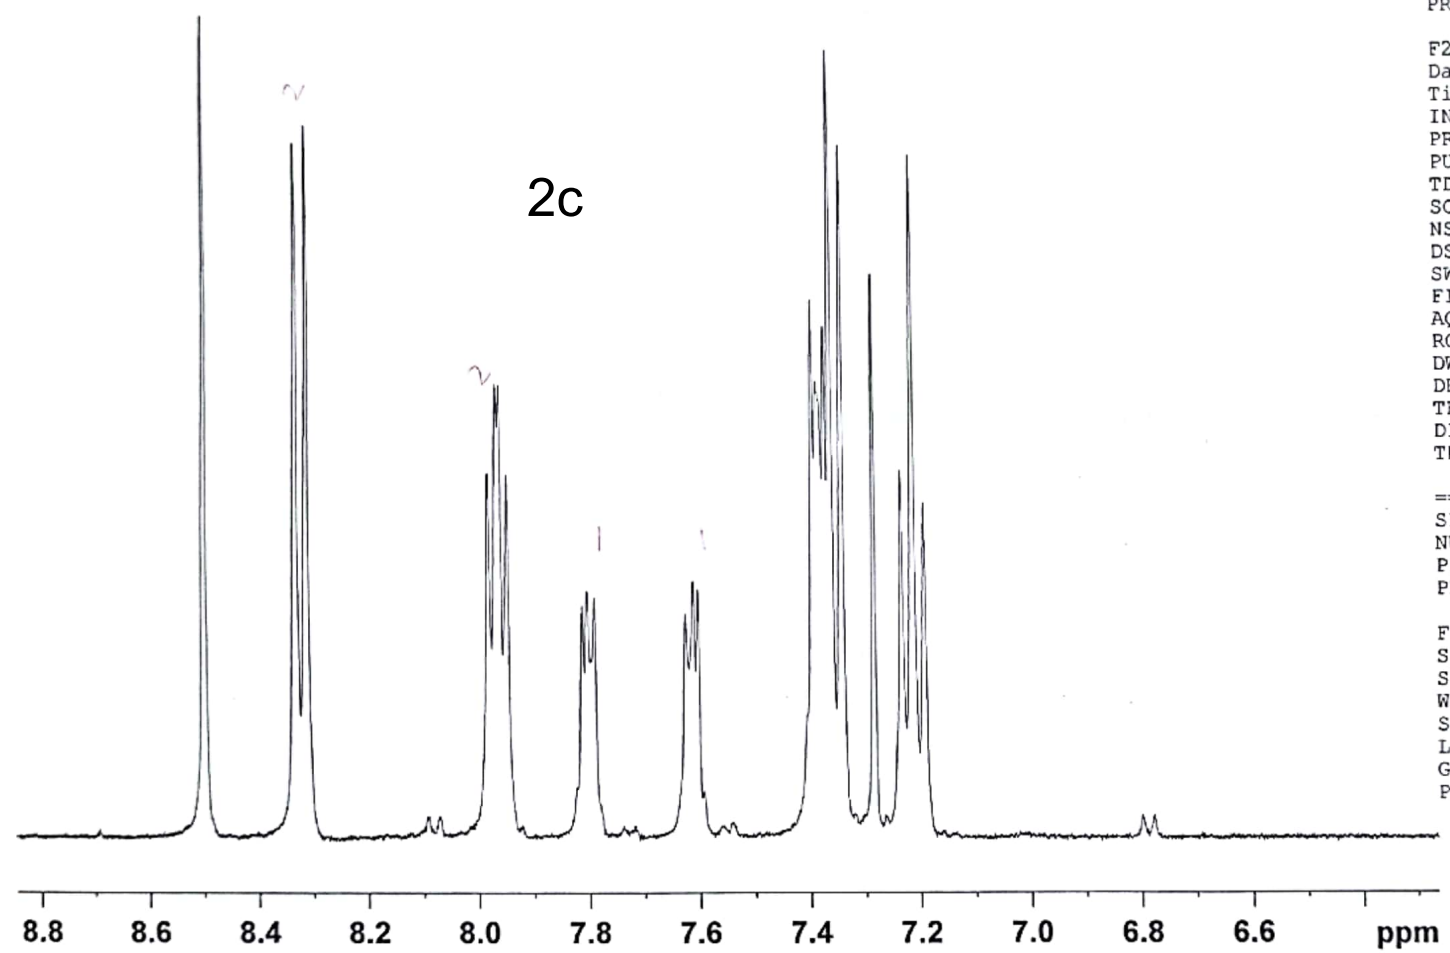

49.31  
96.54  
97.96  
47.78  
49.01  
187.89  
11.55  
123.65

HEBA-4C  
 DEPTQ-BSU CDC13 {C:\data} nmr 18

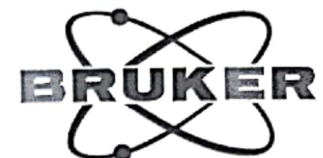

Current Data Parameters  
 NAME Marl5-2015-nmr  
 EXPNO 300  
 PROCNO 1

F2 - Acquisition Parameters  
 Date 20150316  
 Time 9.17  
 INSTRUM spect  
 PROBHD 5 mm PARBO BB/  
 PULPROG deptqqqsp  
 TD 65536  
 SOLVENT CDC13  
 NS 4000  
 DS 4  
 SWH 24038.461 Hz  
 FIDRES 0.366798 Hz  
 AQ 1.3631488 sec  
 RG 205.44  
 DW 20.800 usec  
 DE 6.50 usec  
 TE 294.3 K  
 CNST2 145.000000  
 CNST12 1.500000  
 D1 2.0000000 sec  
 D2 0.0034828 sec  
 D12 0.0000200 sec  
 D16 0.0002000 sec  
 TDO 1

===== CHANNEL f1 =====  
 SFO1 100.6228303 MHz  
 NUC1 13C  
 P1 10.00 usec  
 P13 2000.00 usec  
 PLW0 0 W  
 PLW1 66.00000000 W  
 SPNAM[5] Crp60comp.4  
 SPOALS 0.500  
 SPOFFS5 0 Hz  
 SPW5 10.08399963 W

===== CHANNEL f2 =====  
 SFO2 400.1312797 MHz  
 NUC2 1H  
 CPDPRG[2] waltz16  
 P0 15.75 usec  
 P3 10.50 usec  
 P4 21.00 usec  
 PCPD2 90.00 usec  
 PLW2 16.00000000 W  
 PLW12 0.21777999 W

===== GRADIENT CHANNEL =====  
 GPNAM[1] SMSQ10.100  
 GPNAM[2] SMSQ10.100  
 GPNAM[3] SMSQ10.100  
 GPZ1 31.00 %  
 GPZ2 31.00 %  
 GPZ3 31.00 %  
 P16 1000.00 usec

F2 - Processing parameters  
 S1 32768  
 SF 100.6127690 MHz  
 WDW EM  
 SSB 0  
 LB 1.00 Hz  
 GB 0  
 PC 1.40

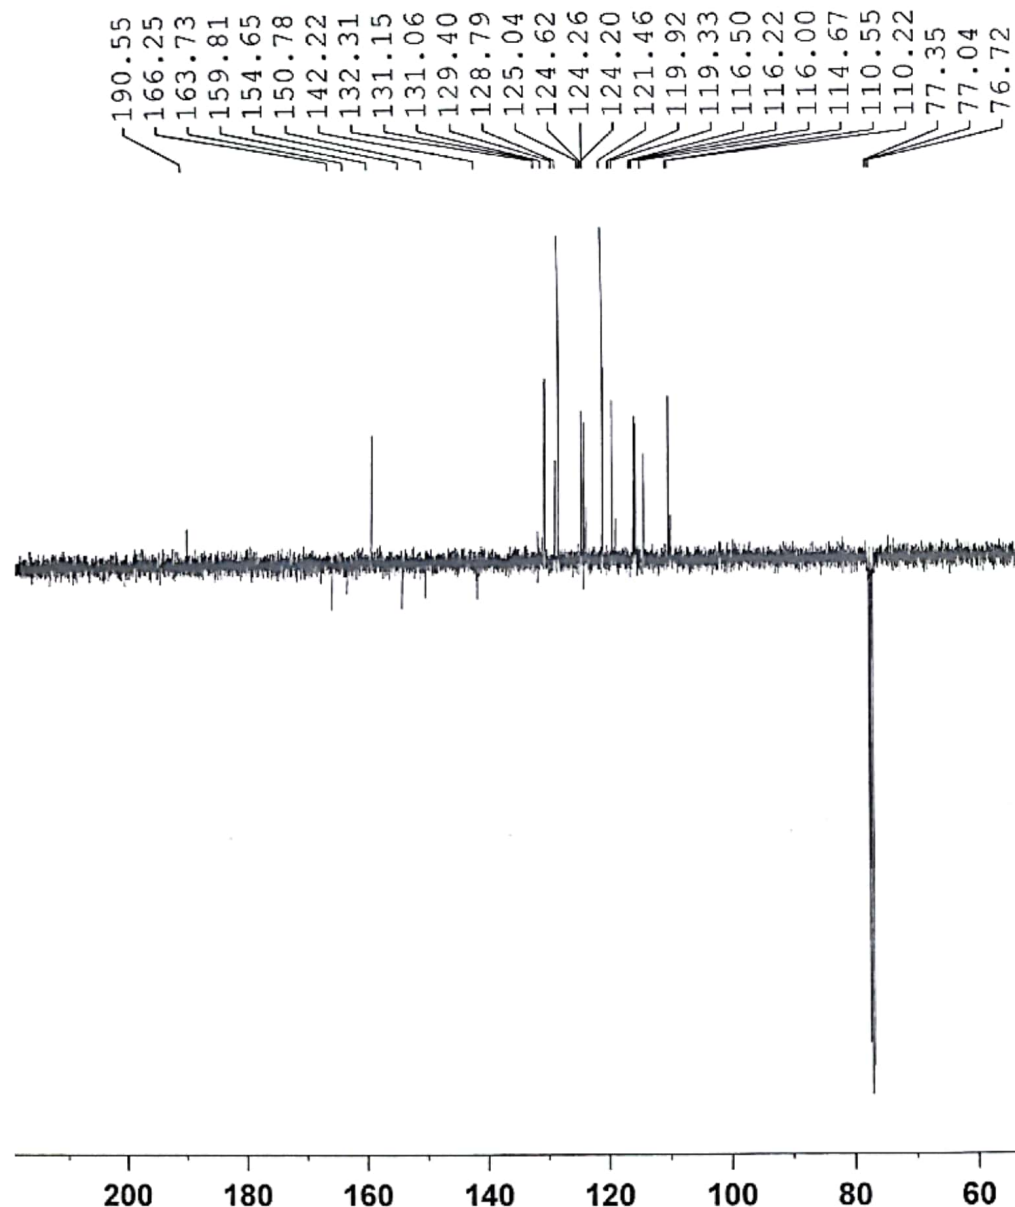

HEBA-4G  
 PROTON\_BSU CDC13 (C:\data) nmr 3

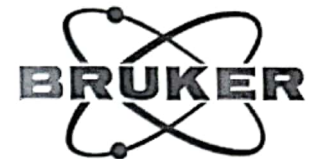

Current Data Parameters  
 NAME May03-2015-nmr  
 EXPNO 270  
 PROCNO 1

F2 - Acquisition Parameters  
 Date\_ 20150503  
 Time\_ 12.45  
 INSTRUM spect  
 PROBHD 5 mm PABBO BB/  
 PULPROG zg30  
 TD 65536  
 SOLVENT CDC13  
 NS 16  
 DS 2  
 SWH 8012.820 Hz  
 FIDRES 0.122266 Hz  
 AQ 4.089465 sec  
 RG 81.84  
 DW 62.400 usec  
 DE 6.50 usec  
 TE 294.0 K  
 D1 1.00000000 sec  
 TD0 1

===== CHANNEL f1 =====  
 SF01 400.1324710 MHz  
 NUC1 1H  
 P1 10.00 usec  
 PLW1 16.00000000 W

F2 - Processing parameters  
 SI 65536  
 SF 400.1300000 MHz  
 WDW EM  
 SSB 0  
 LB 0.10 Hz  
 GB 0  
 PC 1.00

9.914  
 8.459  
 8.316  
 8.295  
 8.091  
 8.071  
 7.920  
 7.899  
 7.798  
 7.786  
 7.619  
 7.606  
 7.386  
 7.379  
 7.376  
 7.361  
 7.339  
 7.284  
 7.041  
 7.021

— 1.672

2d

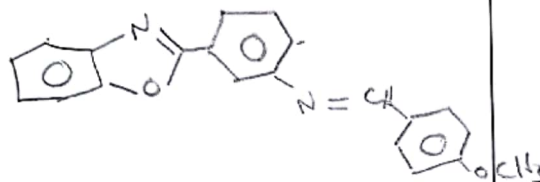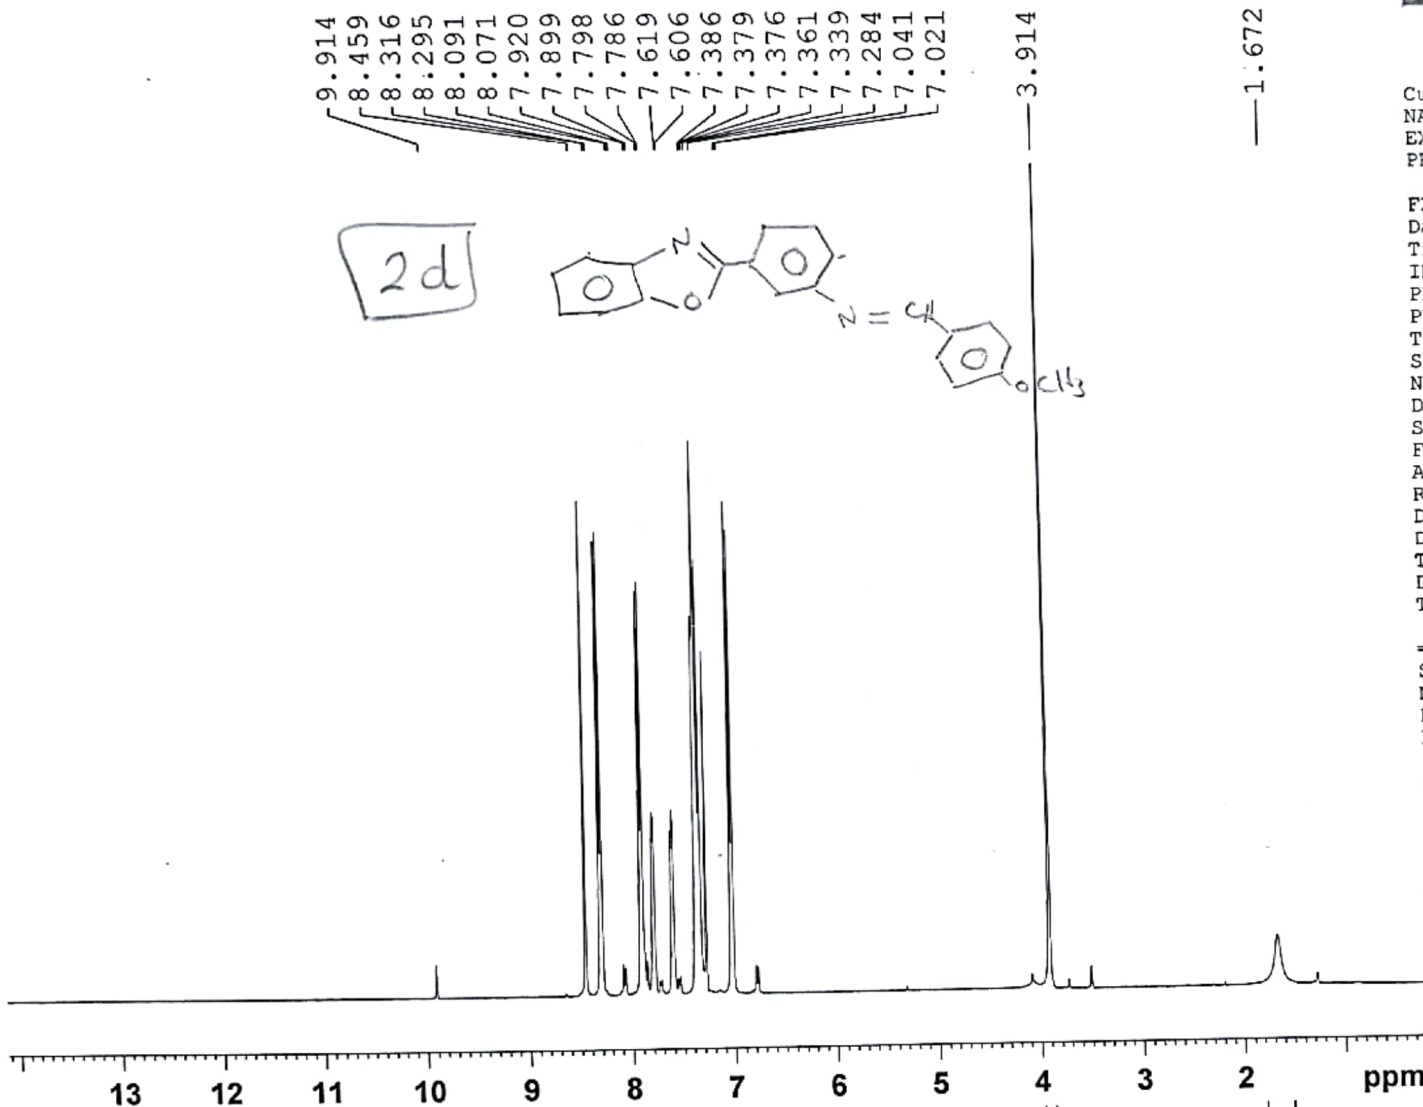

1.00  
 2.00  
 0.15  
 2.10  
 1.00  
 1.03  
 4.05  
 0.72  
 2.13  
 0.13

2 2 1 1 2

CDCl<sub>3</sub>

3.21

0.79

HEBA-4G  
DEPTQ-BSU CDC13 {C:\data} nmr 5

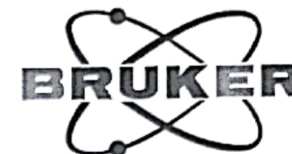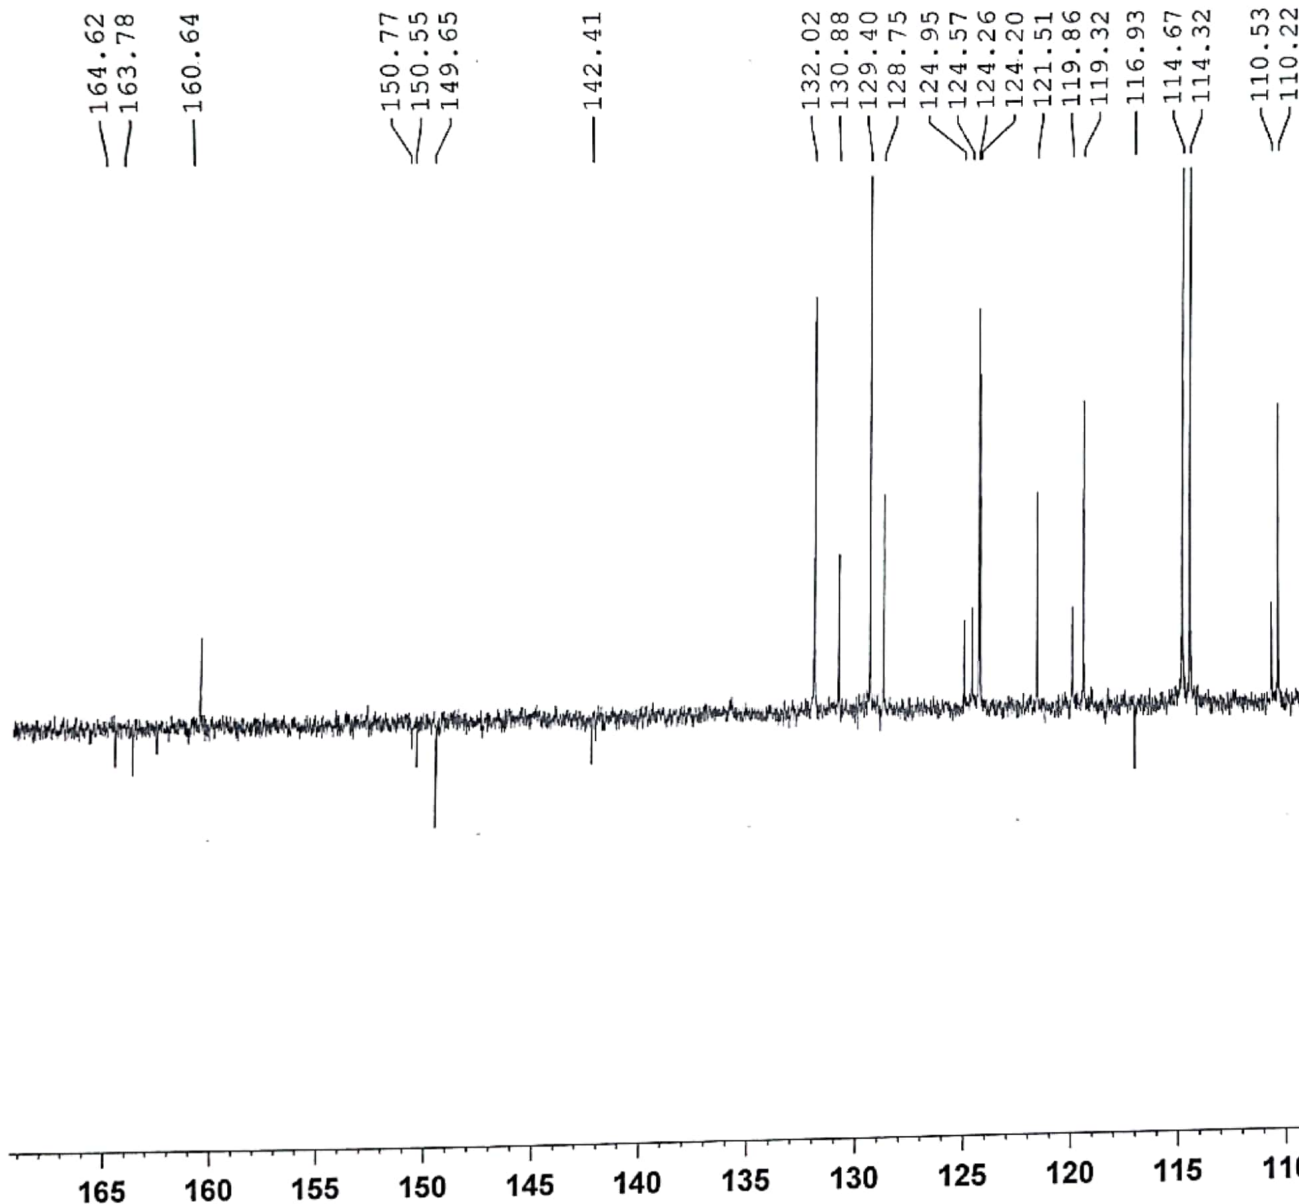

Current Data Parameters  
NAME Jun11-2015-nmr  
EXPNO 400  
PROCNO 1

F2 - Acquisition Parameters  
Date\_ 20150613  
Time\_ 18.30  
INSTRUM spect  
PROBHD 5 mm PARBO BB/  
PULPROG deptqqqpp  
TD 65536  
SOLVENT CDC13  
NS 4000  
DS 4  
SWH 24038.461 Hz  
FIDRES 0.366798 Hz  
AQ 1.3631488 sec  
RG 205.44  
DW 20.800 usec  
DE 6.50 usec  
TE 294.7 K  
CNST2 145.0000000  
CNST12 1.5000000  
D1 2.0000000 sec  
D2 0.00344828 sec  
D12 0.0002000 sec  
D16 0.0002000 sec  
TD0 1

===== CHANNEL f1 =====  
SFO1 100.6228303 MHz  
NUC1 13C  
P1 10.00 usec  
P13 2000.00 usec  
PLW0 0 W  
PLW1 66.00000000 W  
SFXAM[5] Crp60comp.4  
SFOAL5 0.500  
SFOFSS 0 Hz  
SPW5 10.08399963 W

===== CHANNEL f2 =====  
SFO2 400.1312797 MHz  
NUC2 1H  
CPDPRG2 waltz16  
P0 15.75 usec  
P3 10.50 usec  
P4 21.00 usec  
PCPD2 90.00 usec  
PLW2 16.00000000 W  
PLW12 0.21777999 W

===== GRADIENT CHANNEL =====  
GPNAM[1] SMSQ10.100  
GPNAM[2] SMSQ10.100  
GPNAM[3] SMSQ10.100  
GPZ1 31.00 %  
GPZ2 31.00 %  
GPZ3 31.00 %  
P16 1000.00 usec

F2 - Processing parameters  
SI 32768  
SF 100.6127690 MHz  
WDW EM  
SSB 0  
LB 1.00 Hz  
GB 0  
PC 1.40



HEBA-4D  
PROTON\_BSU CDCl3 {C:\data} nmr 24

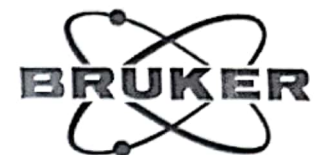

Current Data Parameters  
NAME Mar05-2015-nmr  
EXPNO 230  
PROCNO 1

F2 - Acquisition Parameters  
Date\_ 20150305  
Time 12.13  
INSTRUM spect  
PROBHD 5 mm PABBO BB/  
PULPROG zg30  
TD 65536  
SOLVENT CDCl3  
NS 16  
DS 2  
SWH 8012.820 Hz  
FIDRES 0.122266 Hz  
AQ 4.0894465 sec  
RG 147.93  
DW 62.400 usec  
DE 6.50 usec  
TE 293.8 K  
D1 1.00000000 sec  
TDO 1

==== CHANNEL f1 =====  
SFO1 400.1324710 MHz  
NUC1 1H  
P1 10.00 usec  
PLW1 16.00000000 W

F2 - Processing parameters  
SI 65536  
SF 400.1300000 MHz  
WDW EM  
SSB 0  
LB 0.10 Hz  
GB 0  
PC 1.00

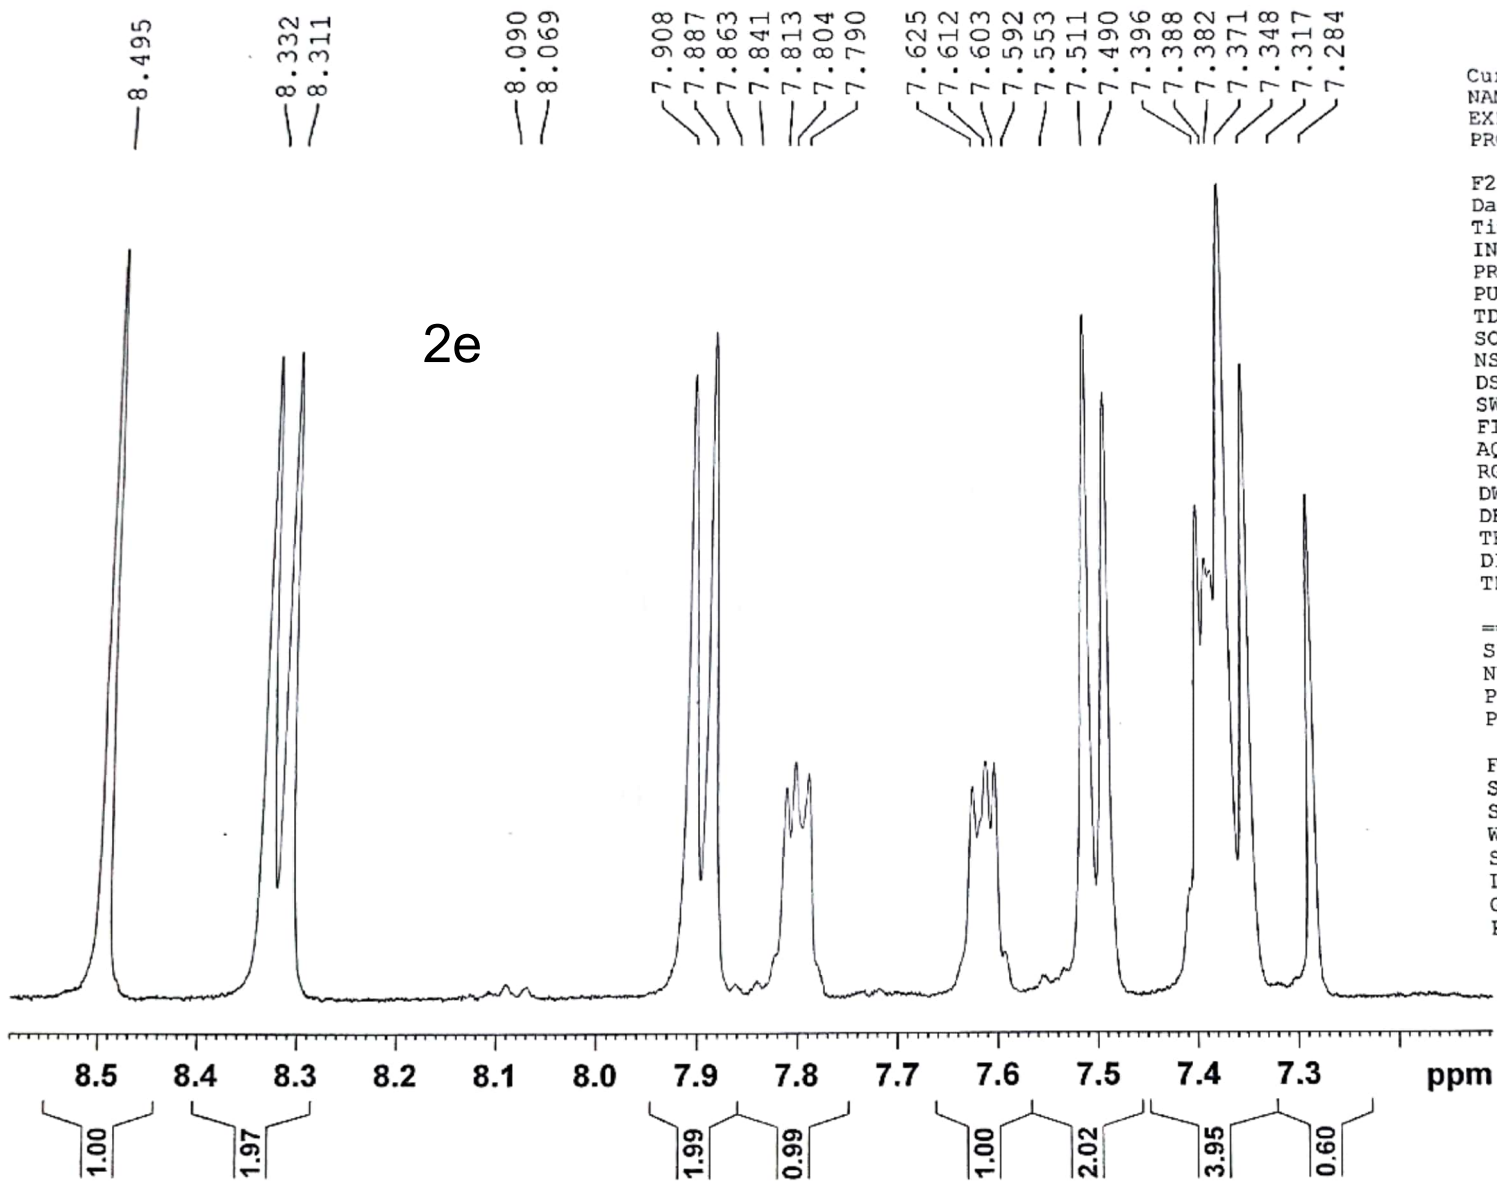

HEBA-1-MCL  
PROTON\_BSU CDC13 {C:\data} nmr 18

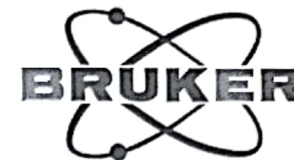

Current Data Parameters  
NAME Mar05-2015-nmr  
EXPNO 170  
PROCNO 1

F2 - Acquisition Parameters  
Date\_ 20150305  
Time 11.46  
INSTRUM spect  
PROBHD 5 mm PABBO BB/  
PULPROG zg30  
TD 65536  
SOLVENT CDC13  
NS 16  
DS 2  
SWH 8012.820 Hz  
FIDRES 0.122266 Hz  
AQ 4.0894465 sec  
RG 147.93  
DW 62.400 usec  
DE 6.50 usec  
TE 293.9 K  
D1 1.00000000 sec  
TDO 1

===== CHANNEL f1 =====  
SFO1 400.1324710 MHz  
NUC1 1H  
P1 10.00 usec  
PLW1 16.00000000 W

F2 - Processing parameters  
SI 65536  
SF 400.1300000 MHz  
WDW EM  
SSB 0  
LB 0.10 Hz  
GB 0  
PC 1.00

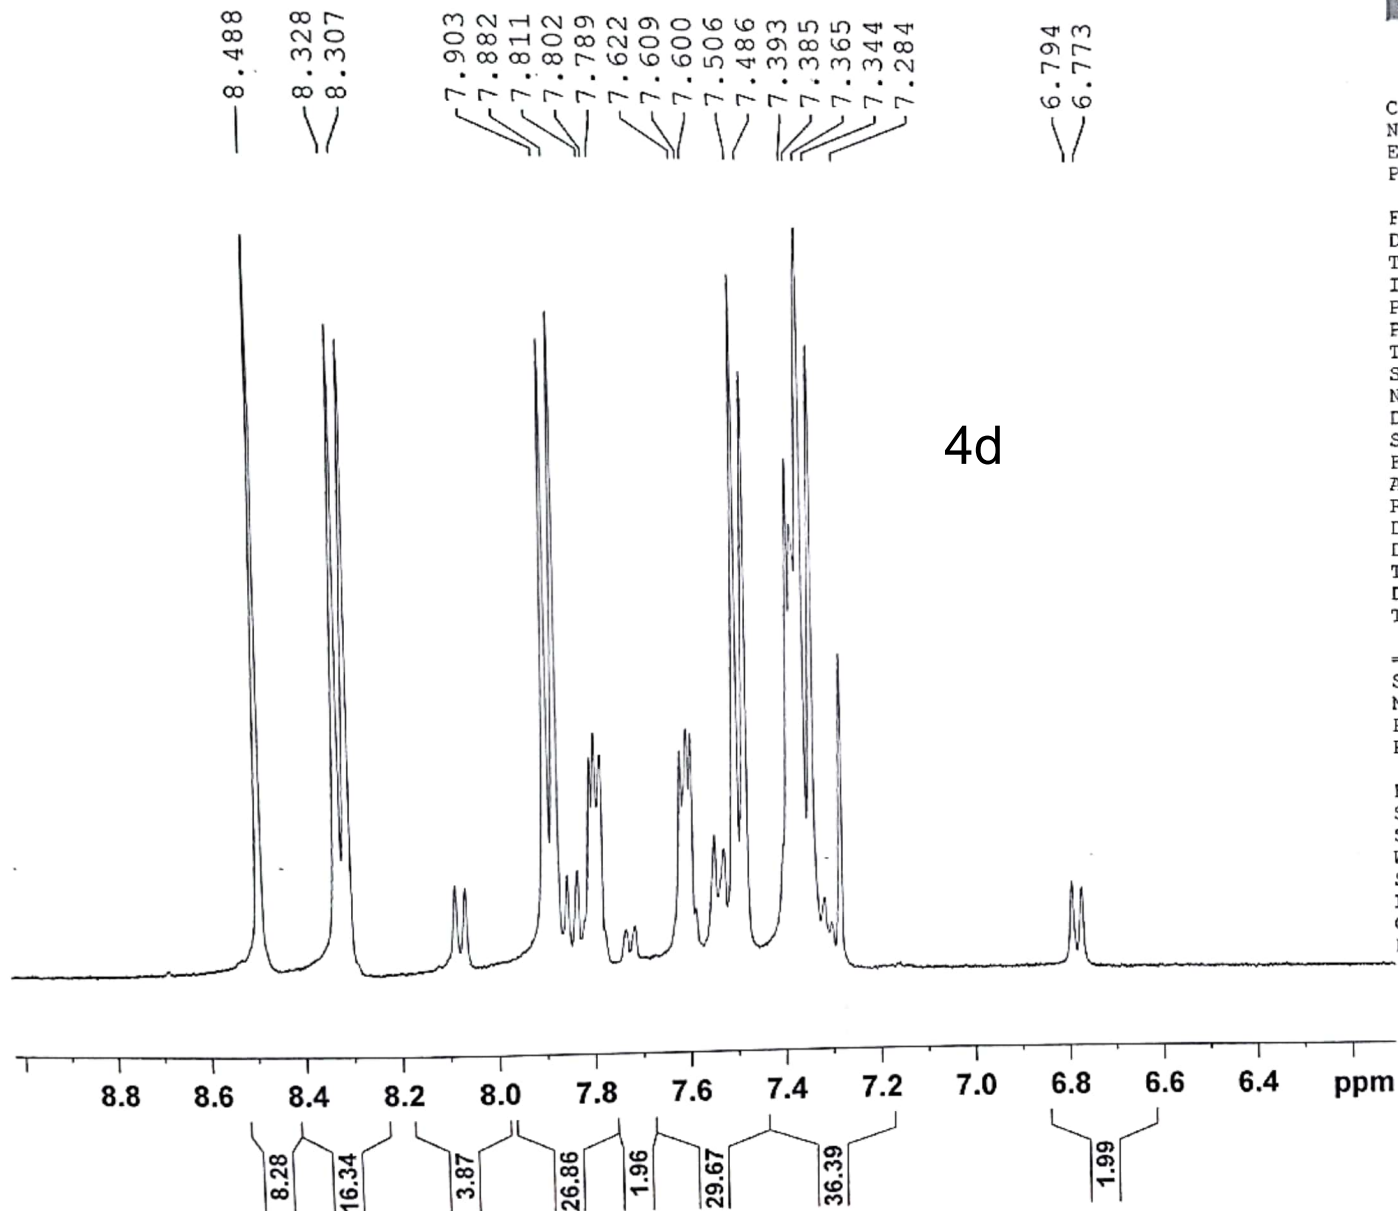

RT: 0.12 - 3.10 SM: 15B

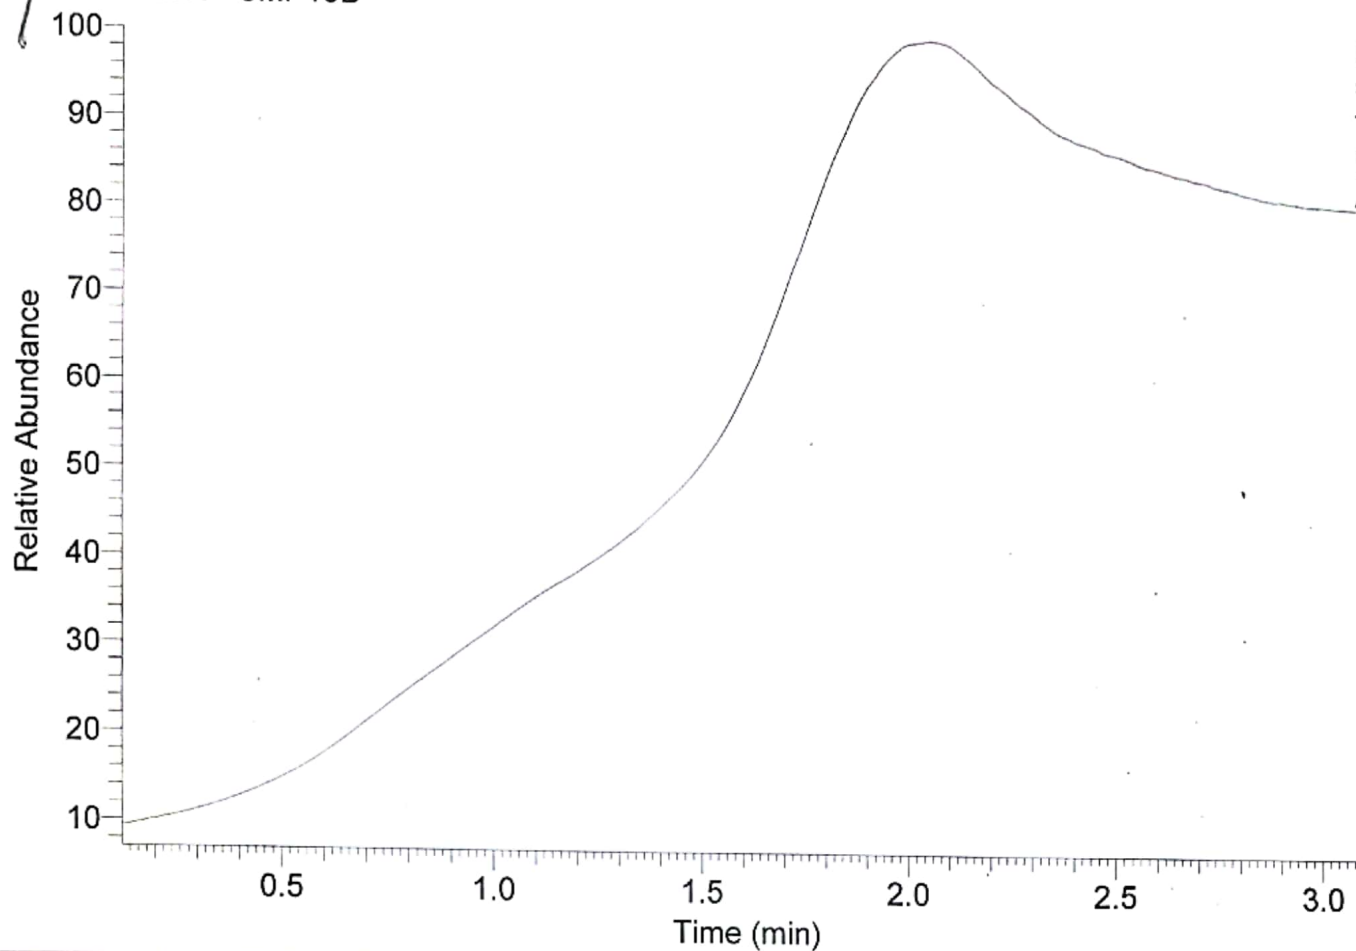

NL:  
5.08E8  
TIC MS  
HEBA-  
ATEF-4D

HEBA-ATEF-4D #121 RT: 2.04 AV: 1 NL: 1.41E8  
T: {0,0} + c EI Full ms [40.00-1000.00]

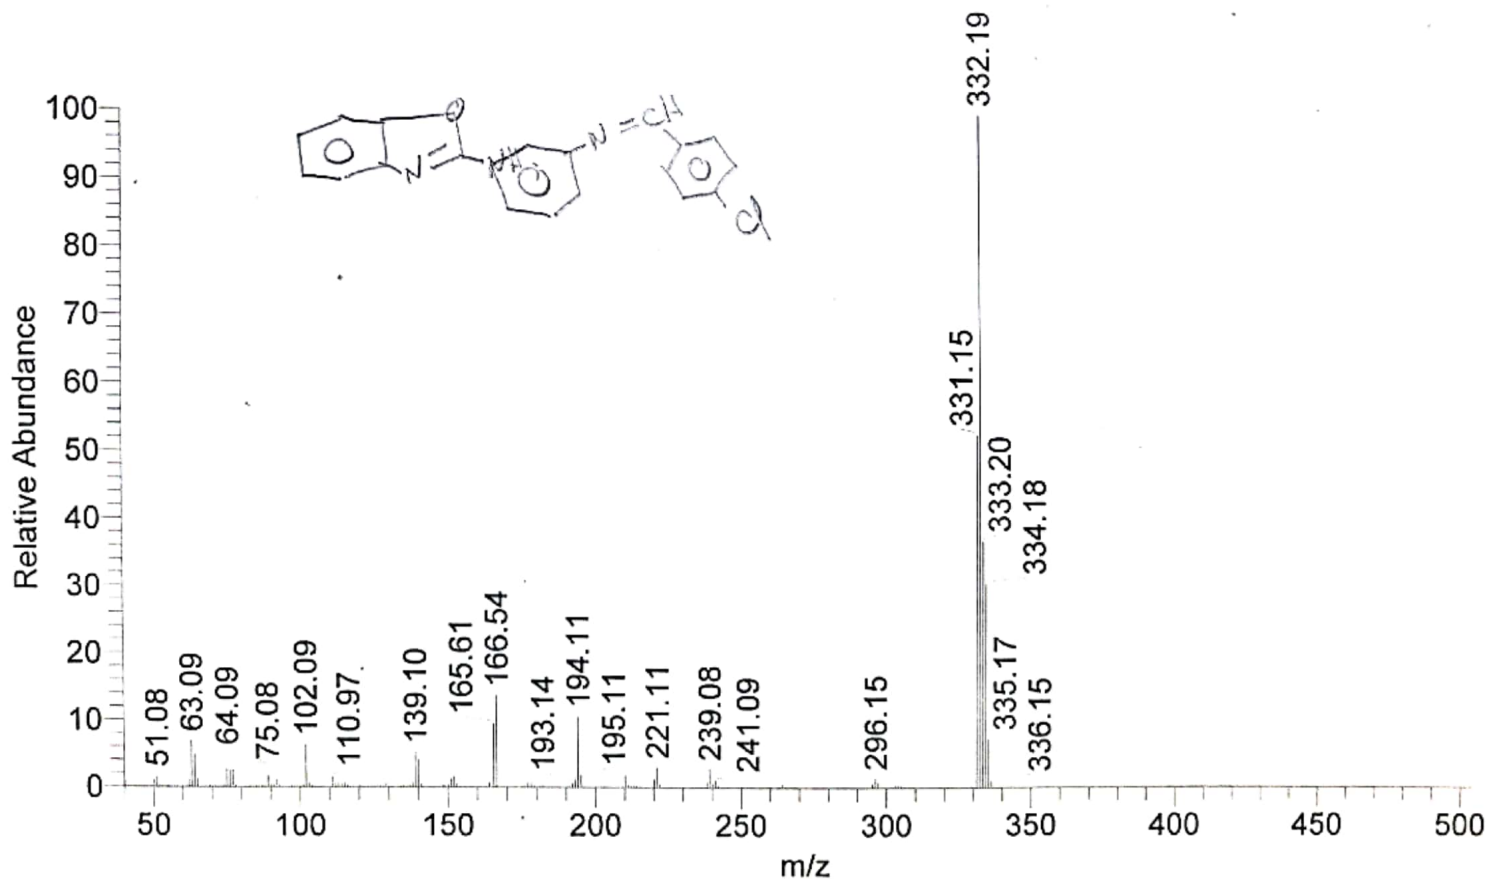

A-ATEF-4D#121 RT: 2.04

{0,0} + c EI Full ms [40.00-1000.00]

z= 40.00-504.01

| m/z    | Intensity   | Relative |
|--------|-------------|----------|
| 40.17  | 1209924.4   | 0.86     |
| 50.07  | 1350006.5   | 0.96     |
| 51.08  | 2157045.8   | 1.53     |
| 62.09  | 1369074.9   | 0.97     |
| 63.09  | 9699247.0   | 6.89     |
| 64.09  | 6923080.0   | 4.92     |
| 65.10  | 1597905.0   | 1.13     |
| 75.08  | 3756161.3   | 2.67     |
| 76.09  | 3364332.8   | 2.39     |
| 77.10  | 3453805.3   | 2.45     |
| 89.10  | 2427412.0   | 1.72     |
| 92.08  | 1579385.0   | 1.12     |
| 102.09 | 8836083.0   | 6.28     |
| 110.97 | 2194348.5   | 1.56     |
| 113.08 | 1067448.5   | 0.76     |
| 139.10 | 7146959.5   | 5.08     |
| 140.10 | 5721987.5   | 4.06     |
| 151.19 | 1773000.5   | 1.26     |
| 152.12 | 2257774.8   | 1.60     |
| 165.61 | 13383663.0  | 9.51     |
| 166.54 | 19211098.0  | 13.64    |
| 177.10 | 1048933.5   | 0.75     |
| 178.11 | 1015557.2   | 0.72     |
| 193.14 | 1456183.3   | 1.03     |
| 194.11 | 14918124.0  | 10.60    |
| 195.11 | 2620085.0   | 1.86     |
| 210.11 | 2420634.5   | 1.72     |
| 220.11 | 1670932.1   | 1.19     |
| 221.11 | 4170292.3   | 2.96     |
| 238.12 | 1294302.4   | 0.92     |
| 239.08 | 3818686.0   | 2.71     |
| 241.09 | 1428294.4   | 1.01     |
| 296.15 | 1951939.8   | 1.39     |
| 297.17 | 1048052.9   | 0.74     |
| 331.15 | 74490352.0  | 52.91    |
| 332.19 | 140794816.0 | 100.00   |
| 333.20 | 52392040.0  | 37.21    |
| 334.18 | 43396020.0  | 30.82    |
| 335.17 | 10219559.0  | 7.26     |
| 336.15 | 1362400.9   | 0.97     |

HEBA-4E  
 PROTON\_BSU CDC13 {C:\data} nmr 3

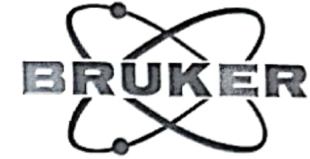

Current Data Parameters  
 NAME Mar05-2015-nmr  
 EXPNO 260  
 PROCNO 1

F2 - Acquisition Parameters  
 Date\_ 20150305  
 Time\_ 12.27  
 INSTRUM spect  
 PROBHD 5 mm PABBO BB/  
 PULPROG zg30  
 TD 65536  
 SOLVENT CDC13  
 NS 16  
 DS 2  
 SWH 8012.820 Hz  
 FIDRES 0.122266 Hz  
 AQ 4.0894465 sec  
 RG 147.93  
 DW 62.400 usec  
 DE 6.50 usec  
 TE 293.8 K  
 D1 1.00000000 sec  
 TDO 1

===== CHANNEL f1 =====  
 SFO1 400.1324710 MHz  
 NUC1 1H  
 P1 10.00 usec  
 PLW1 16.00000000 W

F2 - Processing parameters  
 SI 65536  
 SF 400.1300000 MHz  
 WDW EM  
 SSB 0  
 LB 0.10 Hz  
 GB 0  
 PC 1.00

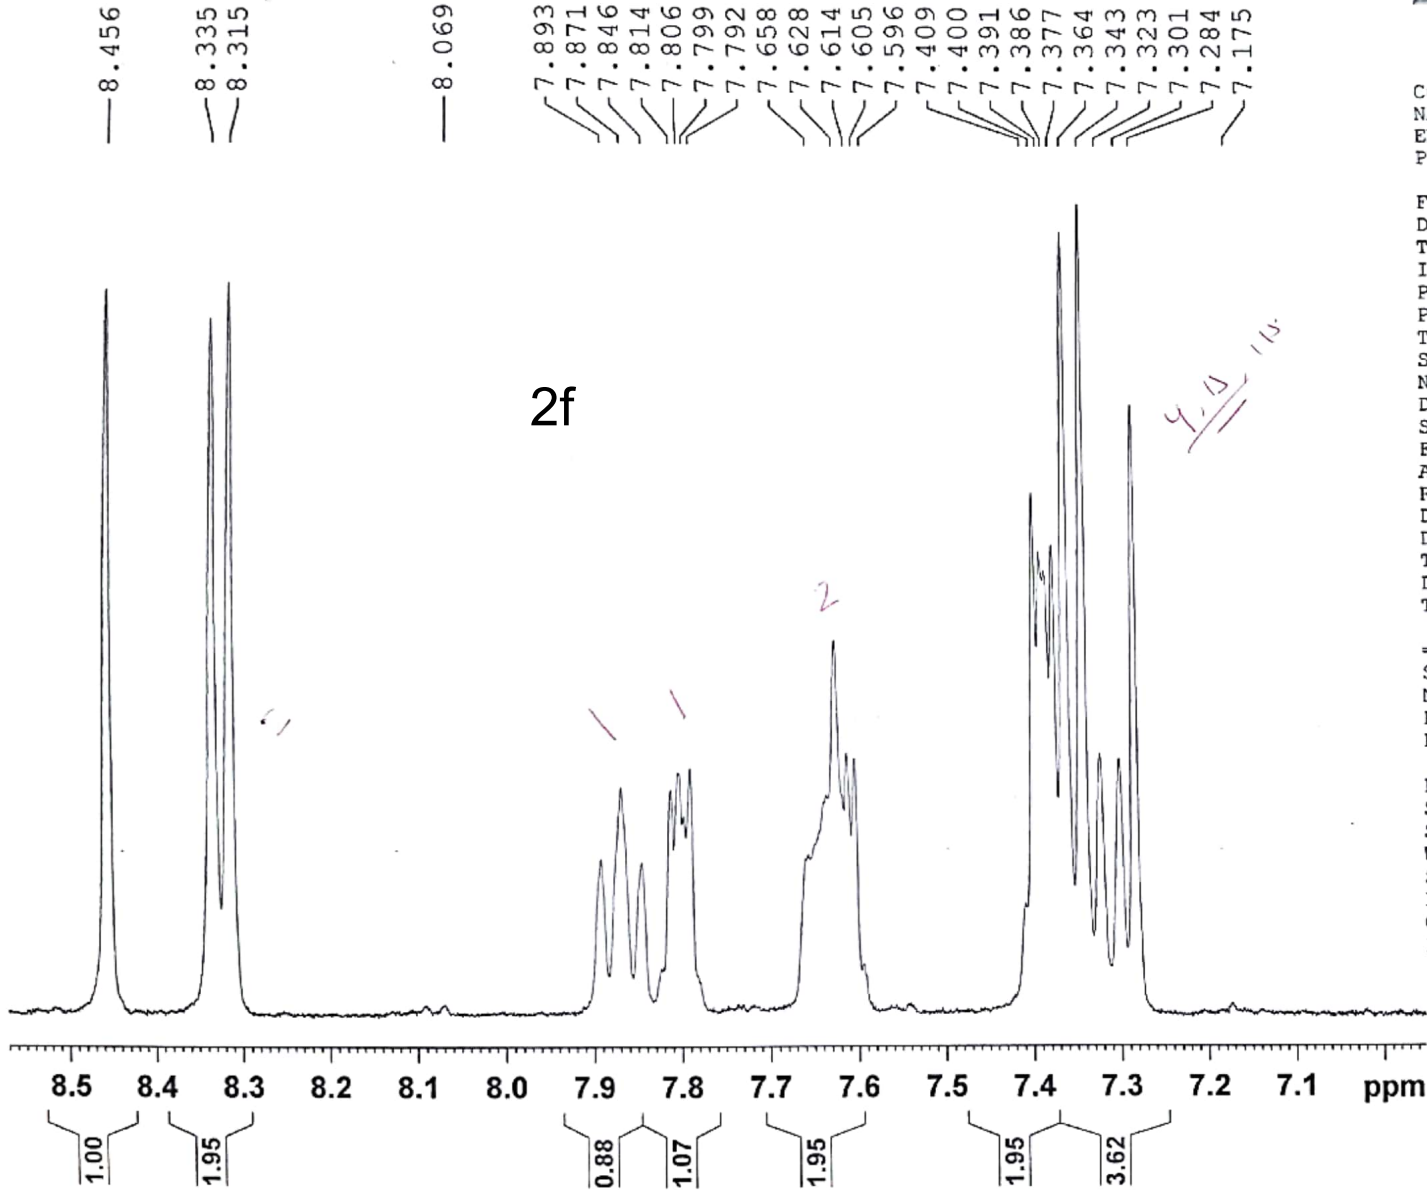

HEBA-4E  
 DEPTQ-BSU CDCl3 {C:\data} nmr 19

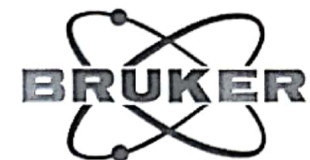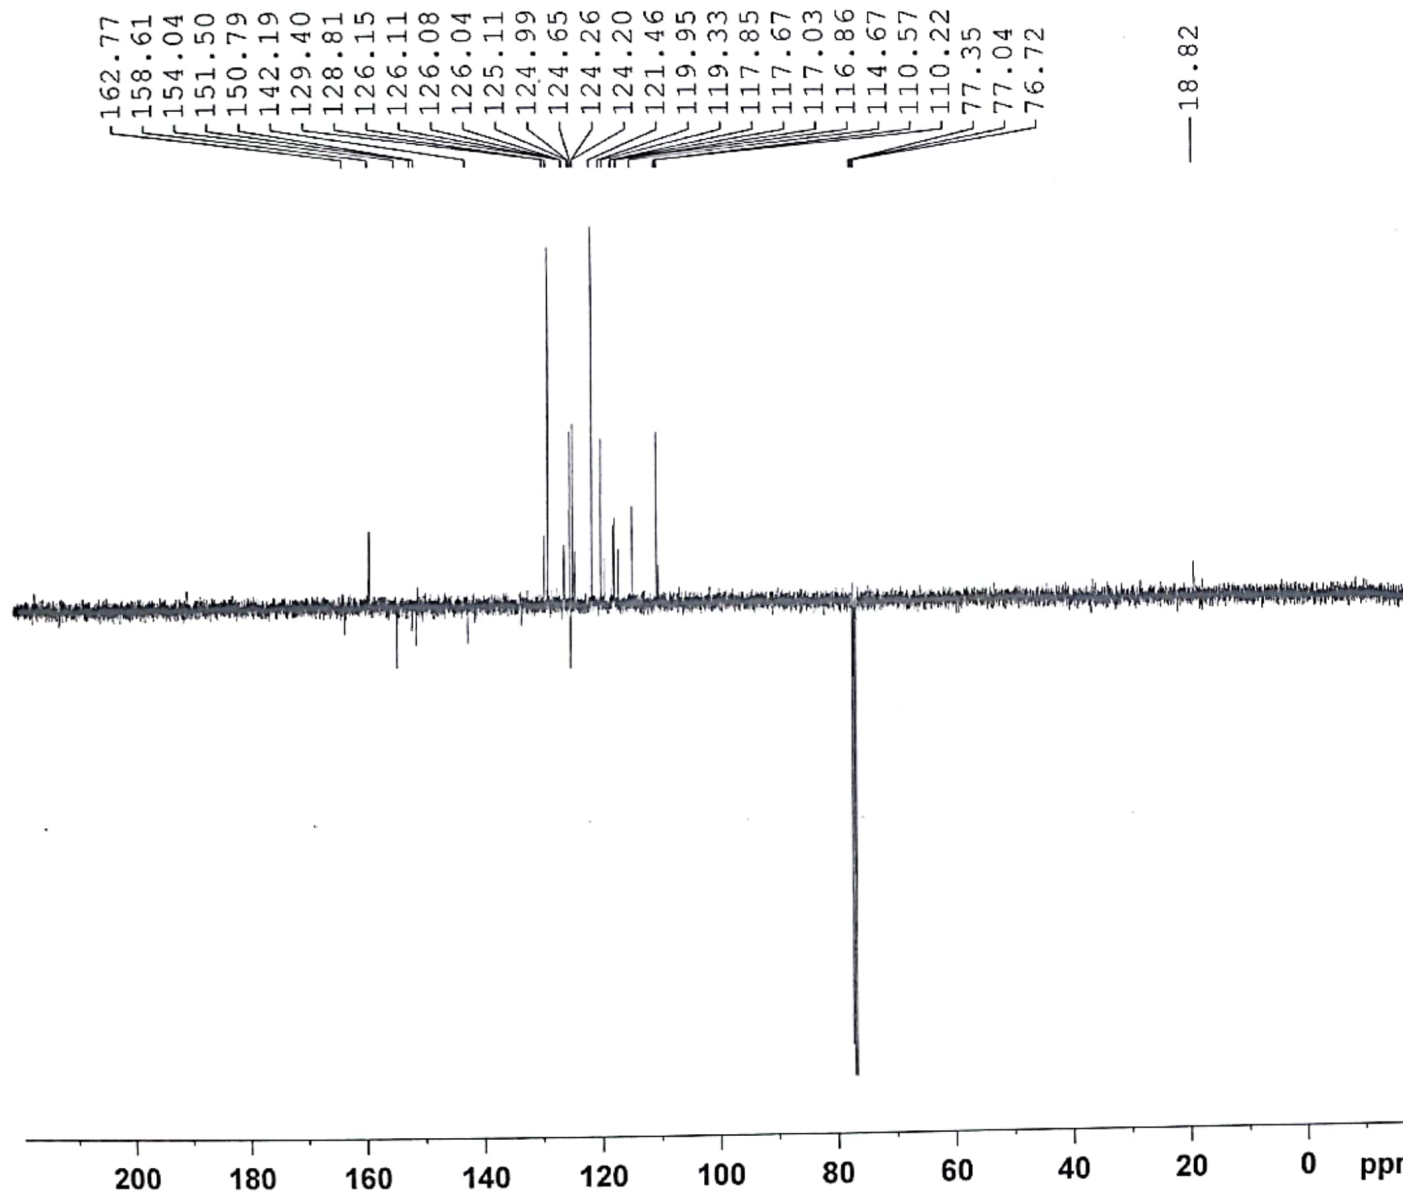

162.77  
 158.61  
 154.04  
 151.50  
 150.79  
 142.19  
 129.40  
 128.81  
 126.15  
 126.11  
 126.08  
 126.04  
 125.11  
 124.99  
 124.65  
 124.26  
 124.20  
 121.46  
 119.95  
 119.33  
 117.85  
 117.67  
 117.03  
 116.86  
 114.67  
 110.57  
 110.22  
 77.35  
 77.04  
 76.72

—18.82

Current Data Parameters  
 NAME Mar15-2015-nmr  
 EXPNO 310  
 PROCNO 1

F2 - Acquisition Parameters  
 Date\_ 20150316  
 Time 10.07  
 INSTRUM spect  
 PROBHD 5 mm PABBO BB/  
 PULPROG deptqppsp  
 TD 65536  
 SOLVENT CDCl3  
 NS 4000  
 DS 4  
 SWH 24038.461 Hz  
 FIDRES 0.366798 Hz  
 AQ 1.3631488 sec  
 RG 205.44  
 DW 20.800 usec  
 DE 6.50 usec  
 TE 294.3 K  
 CNST2 145.000000  
 CNST12 1.500000  
 D1 2.00000000 sec  
 D2 0.00344828 sec  
 D12 0.00002000 sec  
 D16 0.00020000 sec  
 TD0 1

==== CHANNEL f1 =====  
 SFO1 100.6228303 MHz  
 NUC1 13C  
 P1 10.00 usec  
 P13 2000.00 usec  
 PLW0 0 W  
 PLW1 66.00000000 W  
 SPNAM[5] Crp60comp.4  
 SPOALS 0.500  
 SPOFFS5 0 Hz  
 SPW5 10.08399963 W

==== CHANNEL f2 =====  
 SFO2 400.1312797 MHz  
 NUC2 1H  
 CPDPRG[2] waltz16  
 P0 15.75 usec  
 P3 10.50 usec  
 P4 21.00 usec  
 PCPD2 90.00 usec  
 PLW2 16.00000000 W  
 PLW12 0.21777999 W

==== GRADIENT CHANNEL =====  
 GPNAM[1] SMSQ10.100  
 GENAM[2] SMSQ10.100  
 GPNAM[3] SMSQ10.100  
 GPZ1 31.00 %  
 GPZ2 31.00 %  
 GPZ3 31.00 %  
 P16 1000.00 usec

F2 - Processing parameters  
 SI 32768  
 SF 100.6127890 MHz  
 WDW EM  
 SSB 0  
 LB 1.00 Hz  
 GB 0  
 PC 1.40

HEBA-4E  
DEPTQ-BSU CDC13 {C:\data} nmr 19

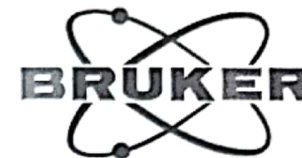

— 162.77  
— 158.61  
— 154.04  
— 151.50  
— 150.79  
142.19  
129.40  
128.81  
126.15  
126.11  
126.08  
126.04  
125.11  
124.99  
124.65  
124.26  
124.20  
121.46  
119.95  
119.33  
117.85  
117.67  
117.03  
116.86  
114.67  
110.57  
110.22

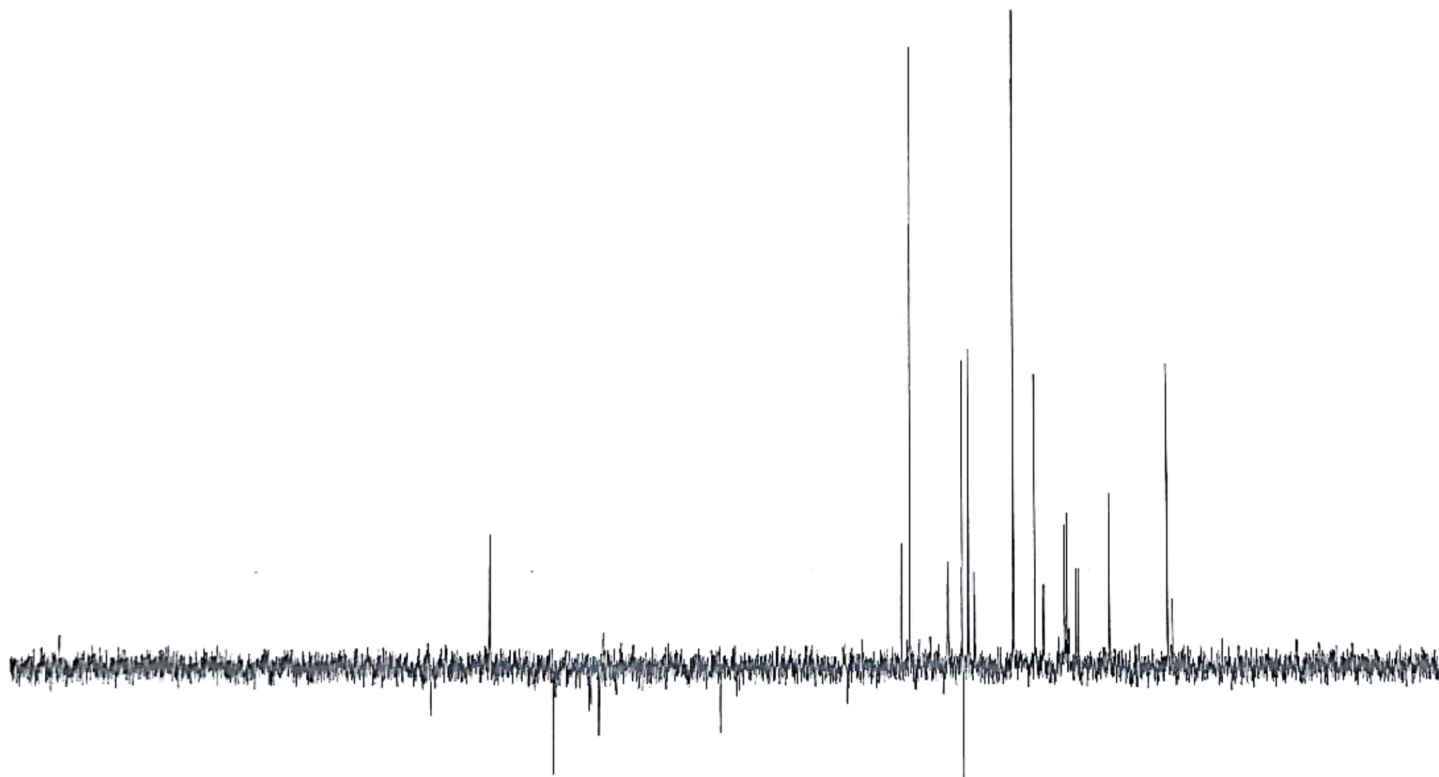

Current Data Parameters  
NAME Mar15-2015-nmr  
EXPNO 310  
PROCNO 1

F2 - Acquisition Parameters  
Date\_ 20150316  
Time\_ 10.07  
INSTRUM spect  
PROBHD 5 mm PABBO BB/  
PULPROG deptqqppp  
TD 65536  
SOLVENT CDC13  
NS 4000  
DS 4  
SWH 24038.461 Hz  
FIDRES 0.366798 Hz  
AQ 1.3631488 sec  
RG 205.44  
DW 20.800 usec  
DE 6.50 usec  
TE 294.3 K  
CNST2 145.000000  
CNST12 1.500000  
D1 2.0000000 sec  
D2 0.00344828 sec  
D12 0.00002000 sec  
D16 0.00020000 sec  
TD0 1

===== CHANNEL f1 =====  
SFO1 100.6228303 MHz  
NUC1 13C  
P1 10.00 usec  
P13 2000.00 usec  
PLWD 0 W  
PLW1 66.00000000 W  
SFNAM[5] Crp60ccomp.4  
SFOALS 0.500  
SPOFFS5 0 Hz  
SFWS 10.08399963 W

===== CHANNEL f2 =====  
SFO2 400.1312797 MHz  
NUC2 1H  
CPDPRG[2] waltz16  
P0 15.75 usec  
P3 10.50 usec  
P4 21.00 usec  
PCPD2 90.00 usec  
PLW2 16.00000000 W  
PLW12 0.21777999 W

===== GRADIENT CHANNEL =====  
GFNAM[1] SMSQ10.100  
GFNAM[2] SMSQ10.100  
GFNAM[3] SMSQ10.100  
GPZ1 31.00 %  
GPZ2 31.00 %  
GPZ3 31.00 %  
P16 1000.00 usec

F2 - Processing parameters  
SI 32768  
SF 100.6127690 MHz  
WDW EM  
SSB 0  
LB 1.00 Hz  
GB 0  
PC 1.40

HEBA-4F  
PROTON\_BSU CDC13 {C:\data} nmr 4

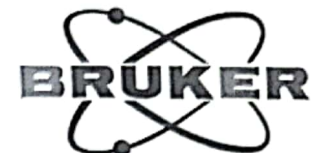

Current Data Parameters  
NAME Mar05-2015-nmr  
EXPNO 270  
PROCNO 1

F2 - Acquisition Parameters  
Date\_ 20150305  
Time\_ 12.31  
INSTRUM spect  
PROBHD 5 mm PABBO BB/  
PULPROG zg30  
TD 65536  
SOLVENT CDC13  
NS 16  
DS 2  
SWH 8012.820 Hz  
FIDRES 0.122266 Hz  
AQ 4.0894465 sec  
RG 147.93  
DW 62.400 usec  
DE 6.50 usec  
TE 293.9 K  
D1 1.0000000 sec  
TD0 1

==== CHANNEL f1 =====  
SF01 400.1324710 MHz  
NUC1 1H  
P1 10.00 usec  
PLW1 16.00000000 W

F2 - Processing parameters  
SI 65536  
SF 400.1300000 MHz  
WDW EM  
SSB 0  
LB 0.10 Hz  
GB 0  
PC 1.00

10.113  
8.557  
8.336  
8.316  
8.069  
8.049  
8.012  
7.835  
7.810  
7.801  
7.780  
7.760  
7.738  
7.714  
7.616  
7.603  
7.595  
7.549  
7.528  
7.383  
7.364  
7.327  
7.311  
7.284  
6.784  
6.763  
3.513  
1.787

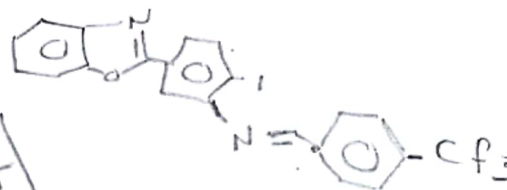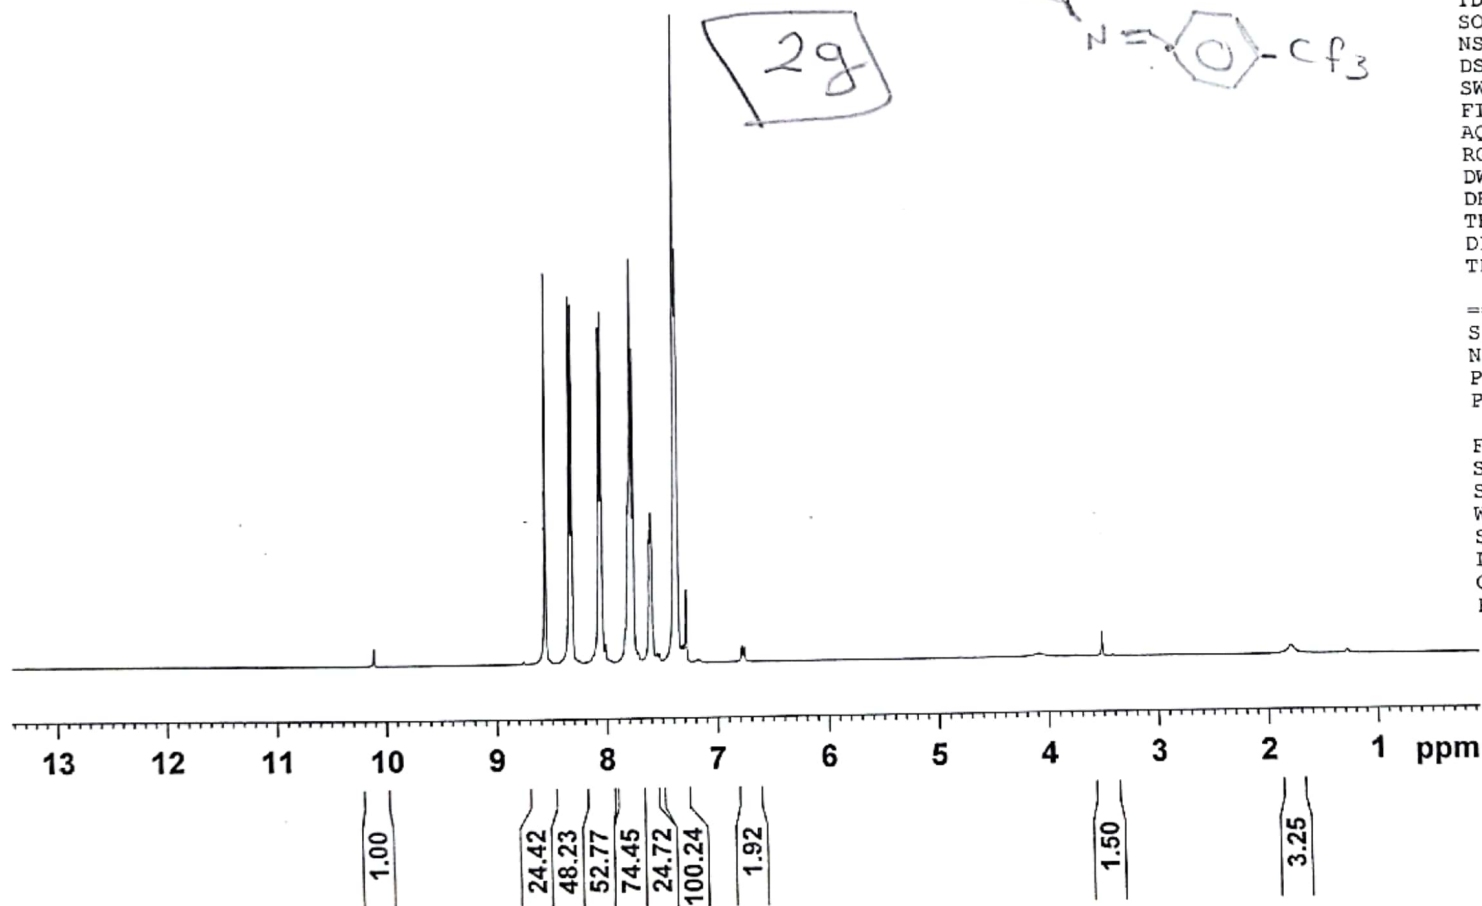



HEBA-M11  
DEPTQ-BSU DMSO (C:\data) nmr 20

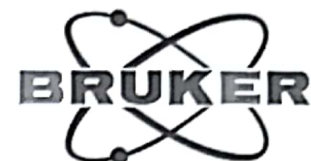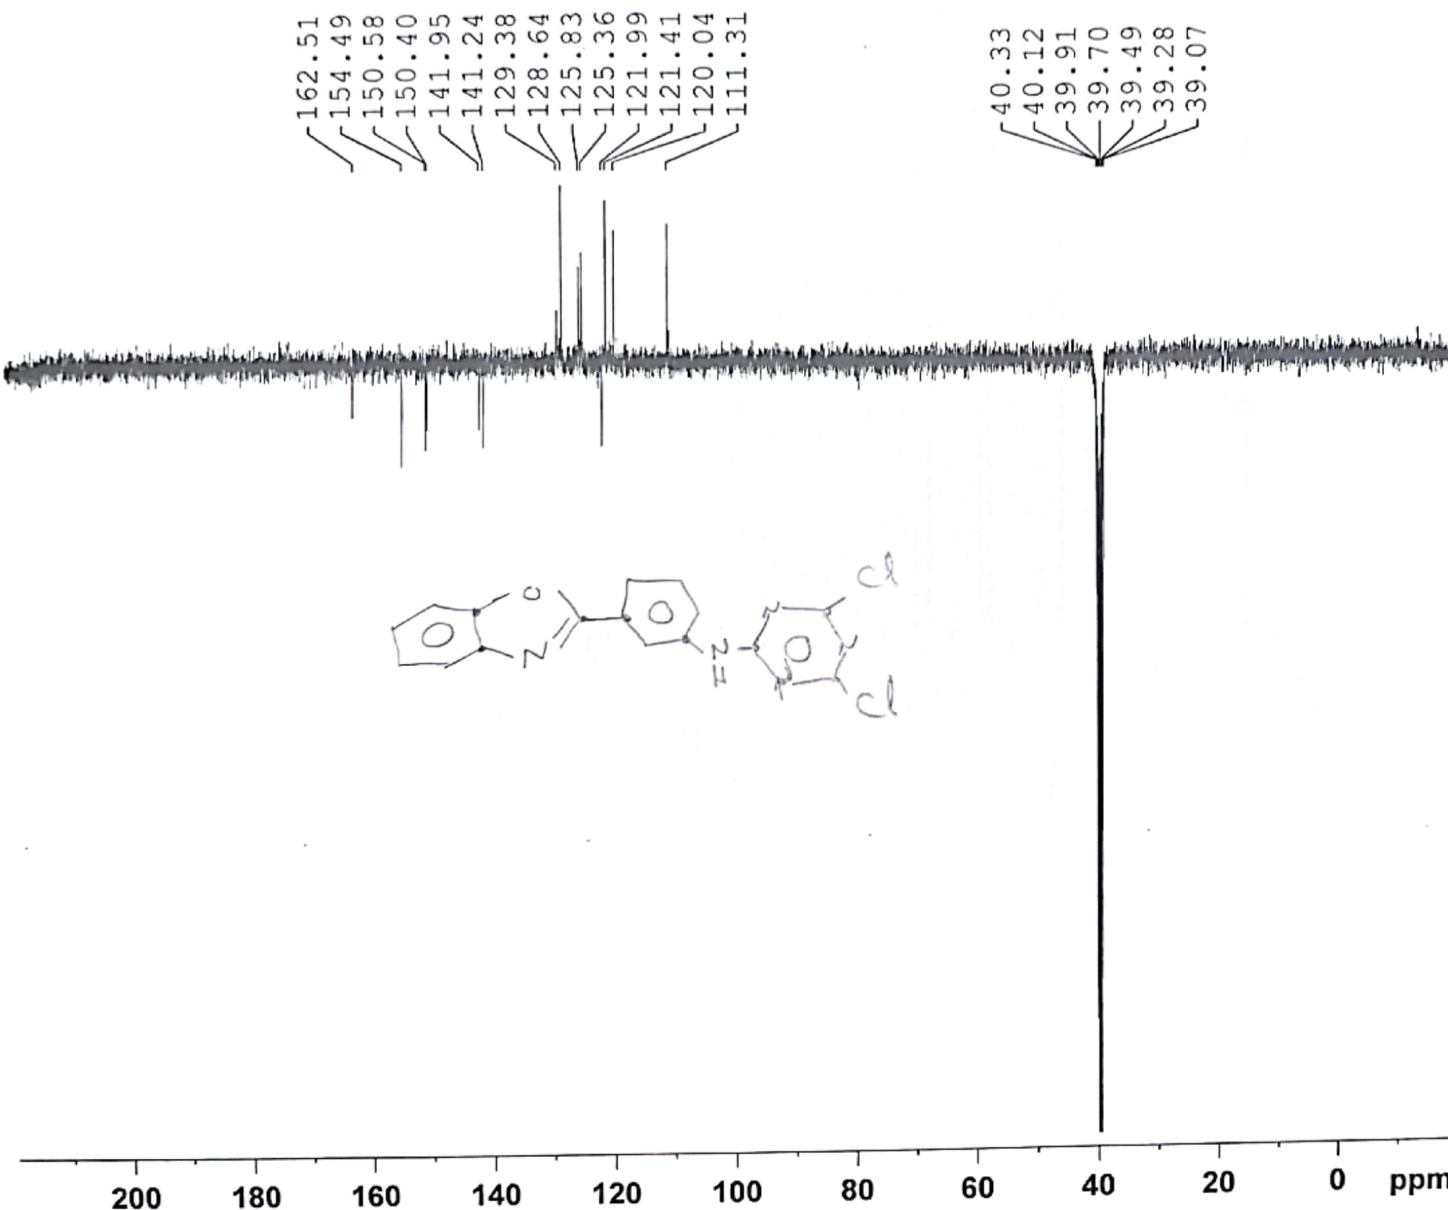

Current Data Parameters  
NAME Apr19-2015-nmr  
EXPNO 520  
PROCNO 1

F2 - Acquisition Parameters  
Date\_ 20150420  
Time 9.11  
INSTRUM spect  
PROBHD 5 mm PABBO BB/  
PULPROG deptqqqpp  
TD 65536  
SOLVENT DMSO  
NS 4000  
DS 4  
SWH 24038.461 Hz  
FIDRES 0.366798 Hz  
AQ 1.3631488 sec  
RG 205.44  
LW 20.800 usec  
DE 6.50 usec  
TE 294.8 K  
CNST2 145.0000000  
CNST12 1.5000000  
D1 2.00000000 sec  
D2 0.00344828 sec  
D12 0.00002000 sec  
D16 0.00020000 sec  
TD0 1

----- CHANNEL f1 -----  
SFO1 100.6228303 MHz  
NUC1 13C  
P1 10.00 usec  
P13 2000.00 usec  
PLW0 0 W  
PLW1 66.00000000 W  
SFNAM[5] Crp60comp.4  
SFOALS 0.500  
SPOFFS5 0 Hz  
SPW5 10.08399963 W

----- CHANNEL f2 -----  
SFO2 400.1312797 MHz  
NUC2 1H  
CPDPRG[2] waltz16  
P0 15.75 usec  
P3 10.50 usec  
P4 21.00 usec  
PCPD2 90.00 usec  
PLW2 16.00000000 W  
PLW12 0.21777999 W

----- GRADIENT CHANNEL -----  
GPNAM[1] SMSQ10.100  
GPNAM[2] SMSQ10.100  
GPNAM[3] SMSQ10.100  
GP21 31.00 %  
GP22 31.00 %  
GP23 31.00 %  
P16 1000.00 usec

F2 - Processing parameters  
SI 32768  
SF 100.6127690 MHz  
WDW EM  
SSB 0  
LB 1.00 Hz  
GB 0  
PC 1.40

HEBA-M11  
DEPTQ-BSU DMSO {C:\data} nmr 20

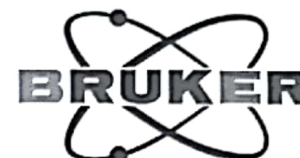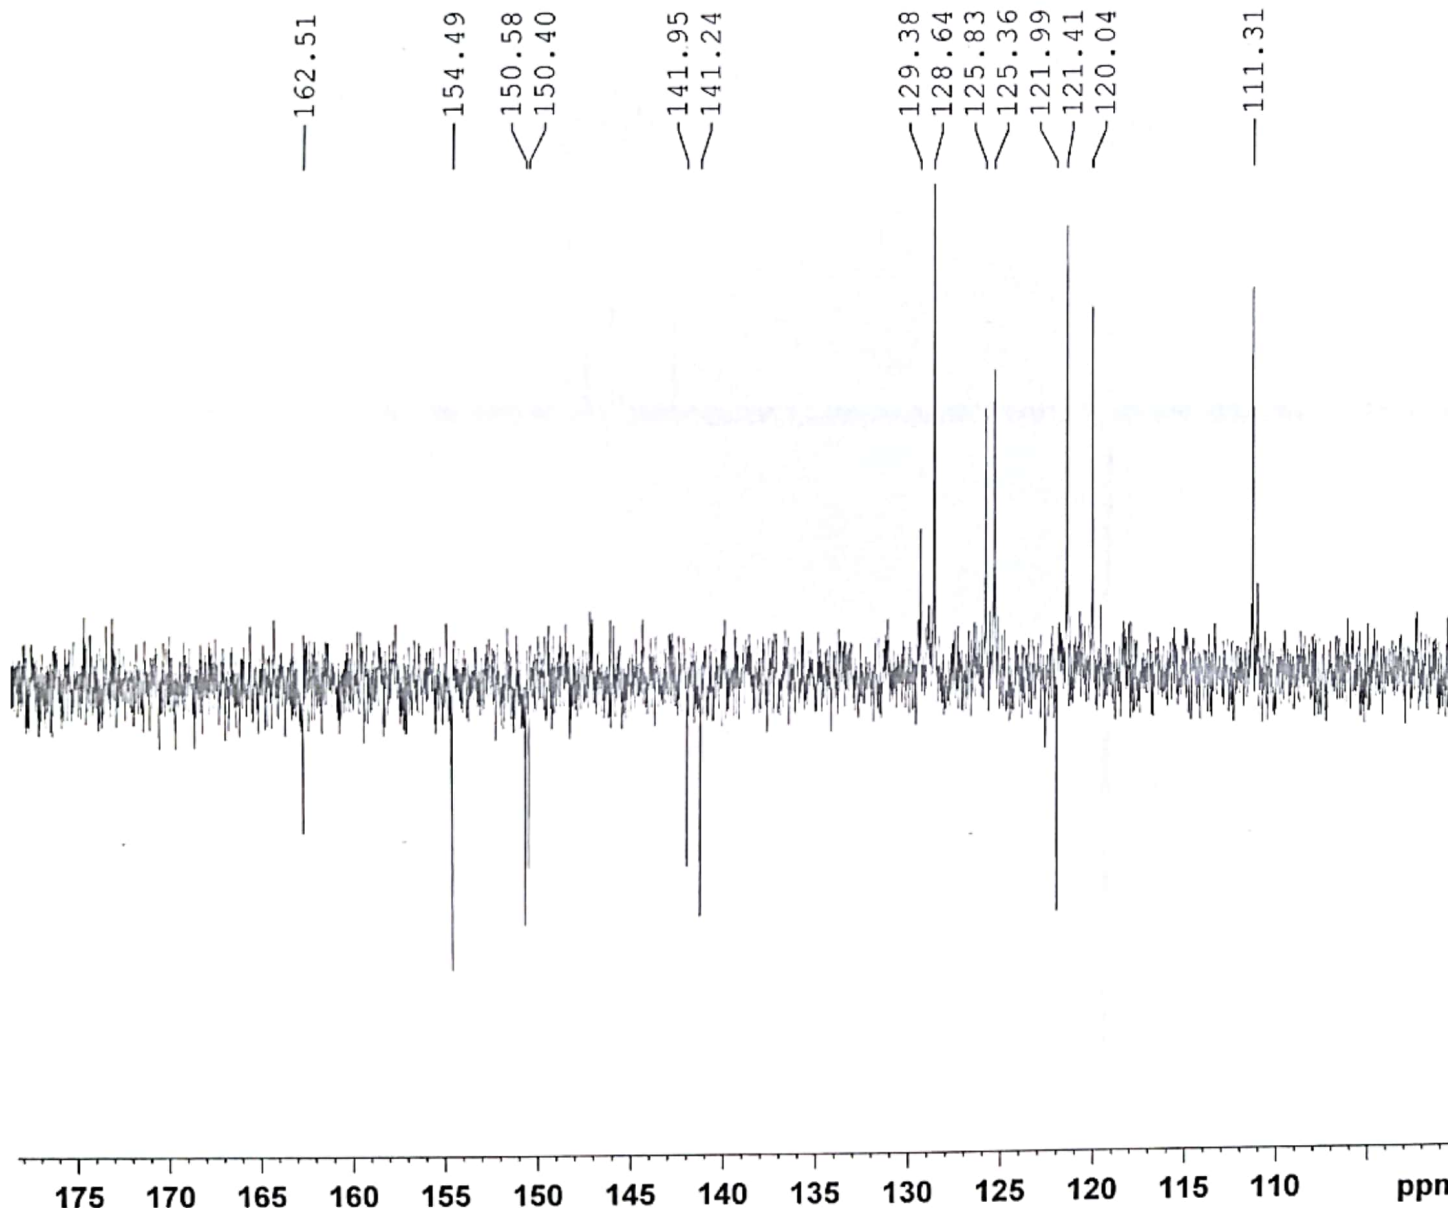

Current Data Parameters  
NAME Apr19-2015-nmr  
EXPNO 520  
PROCNO 1

F2 - Acquisition Parameters  
Date\_ 20150420  
Time 9.11  
INSTRUM spect  
PROBHD 5 mm PABBO BB/  
PULPROG deptqqpsp  
TD 65536  
SOLVENT DMSO  
NS 4000  
DS 4  
SWH 24038.461 Hz  
FIDRES 0.366798 Hz  
AQ 1.3631488 sec  
RG 205.44  
DW 20.800 usec  
DE 6.50 usec  
TE 294.8 K  
CNST2 145.0000000  
CNST12 1.5000000  
D1 2.00000000 sec  
D2 0.00344828 sec  
D12 0.00002000 sec  
D16 0.00020000 sec  
TDO 1

===== CHANNEL f1 =====  
SFO1 100.6228303 MHz  
NUC1 13C  
P1 10.00 usec  
P13 2000.00 usec  
PLW0 0 W  
PLW1 66.00000000 W  
SPNAM[5] Crp60ccmp.4  
SFOAL5 0.500  
SPOFFS5 0 Hz  
SPW5 10.08399963 W

===== CHANNEL f2 =====  
SFO2 400.1312797 MHz  
NUC2 1H  
CPDPRG[2] waltz16  
P0 15.75 usec  
P3 10.50 usec  
P4 21.00 usec  
PCPD2 90.00 usec  
PLW2 16.00000000 W  
PLW12 0.21777999 W

===== GRADIENT CHANNEL =====  
GPNAM[1] SMSQ10.100  
GPNAM[2] SMSQ10.100  
GPNAM[3] SMSQ10.100  
GPZ1 31.00 %  
GPZ2 31.00 %  
GPZ3 31.00 %  
P16 1000.00 usec

F2 - Processing parameters  
SI 32768  
SF 100.6127690 MHz  
WDW EM  
SSB 0  
LB 1.00 Hz  
GB 0  
PC 1.40

HEBA-M11  
DEPTQ-BSU DMSO {C:\data} nmr 20

another  
copy

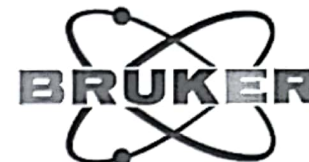

162.51  
154.49  
150.58  
150.40  
141.95  
141.24  
129.38  
128.64  
125.83  
125.36  
121.99  
121.41  
120.04  
111.31

40.33  
40.12  
39.91  
39.70  
39.49  
39.28  
39.07

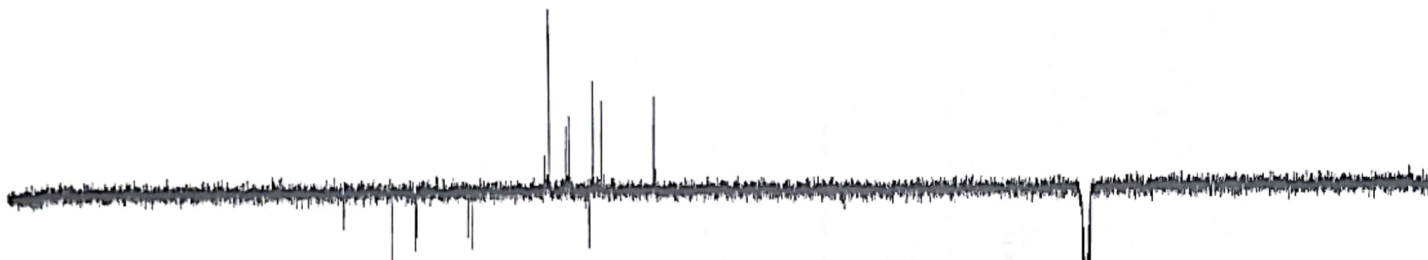

Current Data Parameters  
NAME Apr19-2015-nmr  
EXPNO 520  
PROCNO 1

F2 - Acquisition Parameters  
Date\_ 20150420  
Time 9.11  
INSTRUM spect  
PROBHD 5 mm PABBO BB/  
PULPROG deptqqpsp  
TD 65536  
SOLVENT DMSO  
NS 4000  
DS 4  
SWH 24038.461 Hz  
FIDRES 0.366798 Hz  
AQ 1.3631488 sec  
RG 205.44  
DW 20.800 usec  
DE 6.50 usec  
TE 294.8 K  
CNST2 145.000000  
CNST12 1.500000  
D1 2.00000000 sec  
D2 0.00344828 sec  
D12 0.00002000 sec  
D16 0.00020000 sec  
TD0 1

===== CHANNEL f1 =====  
SFO1 100.6228303 MHz  
NUC1 13C  
P1 10.00 usec  
P13 2000.00 usec  
PLW0 0 W  
PLW1 66.00000000 W  
SPNAM[5] Crp60comp.4  
SPOALS 0.500  
SPOFFS5 0 Hz  
SPW5 10.08399963 W

===== CHANNEL f2 =====  
SFO2 400.1312797 MHz  
NUC2 1H  
CPDPRG[2] waltz16  
P0 15.75 usec  
P3 10.50 usec  
P4 21.00 usec  
PCPD2 90.00 usec  
PLW2 16.00000000 W  
PLW12 0.21777999 W

===== GRADIENT CHANNEL =====  
GPNAM[1] SMSQ10.100  
GPNAM[2] SMSQ10.100  
GPNAM[3] SMSQ10.100  
GFZ1 31.00 %  
GFZ2 31.00 %  
GFZ3 31.00 %  
P16 1000.00 usec

F2 - Processing parameters  
SI 32768  
SF 100.6127690 MHz  
WDW EM  
SSB 0  
LB 1.00 Hz  
GB 0  
PC 1.40

200 180 160 140 120 100 80 60 40 20 0 ppm

HEBA-M11  
DEPTQ-BSU DMSO {C:\data} nmr 20

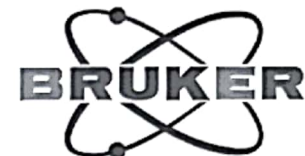

Current Data Parameters  
NAME Apr19-2015-nmr  
EXPNO 520  
PROCNO 1

F2 - Acquisition Parameters  
Date\_ 20150420  
Time 9.11  
INSTRUM spect  
PROBHD 5 mm PABSO BB/  
PULPROG deptqqsp  
TD 65536  
SOLVENT DMSO  
NS 4000  
DS 4  
SWH 24038.461 Hz  
FIDRES 0.366798 Hz  
AQ 1.3631488 sec  
RG 205.44  
DW 20.800 usec  
DE 6.50 usec  
TE 294.8 K  
CNST2 145.000000  
CNST12 1.500000  
D1 2.0000000 sec  
D2 0.00344828 sec  
D12 0.00002000 sec  
D16 0.00020000 sec  
TDO 1

===== CHANNEL f1 =====  
SFO1 100.6228303 MHz  
NUC1 13C  
P1 10.00 usec  
P13 2000.00 usec  
PLW0 0 W  
PLW1 66.00000000 W  
SPNAM[5] Crp60comp.4  
SFOAL5 0.500  
SPOFFS5 0 Hz  
SPW5 10.08399963 W

===== CHANNEL f2 =====  
SFO2 400.1312797 MHz  
NUC2 1H  
CPDPRG[2] waltz16  
P0 15.75 usec  
P3 10.50 usec  
P4 21.00 usec  
PCPD2 90.00 usec  
PLW2 16.00000000 W  
PLW12 0.21777999 W

===== GRADIENT CHANNEL =====  
GPNAM[1] SMSQ10.100  
GPNAM[2] SMSQ10.100  
GPNAM[3] SMSQ10.100  
GPZ1 31.00 %  
GPZ2 31.00 %  
GPZ3 31.00 %  
P16 1000.00 usec

F2 - Processing parameters  
SI 32768  
SF 100.6127690 MHz  
WDW EM  
SSB 0  
LB 1.00 Hz  
GB 0  
PC 1.40

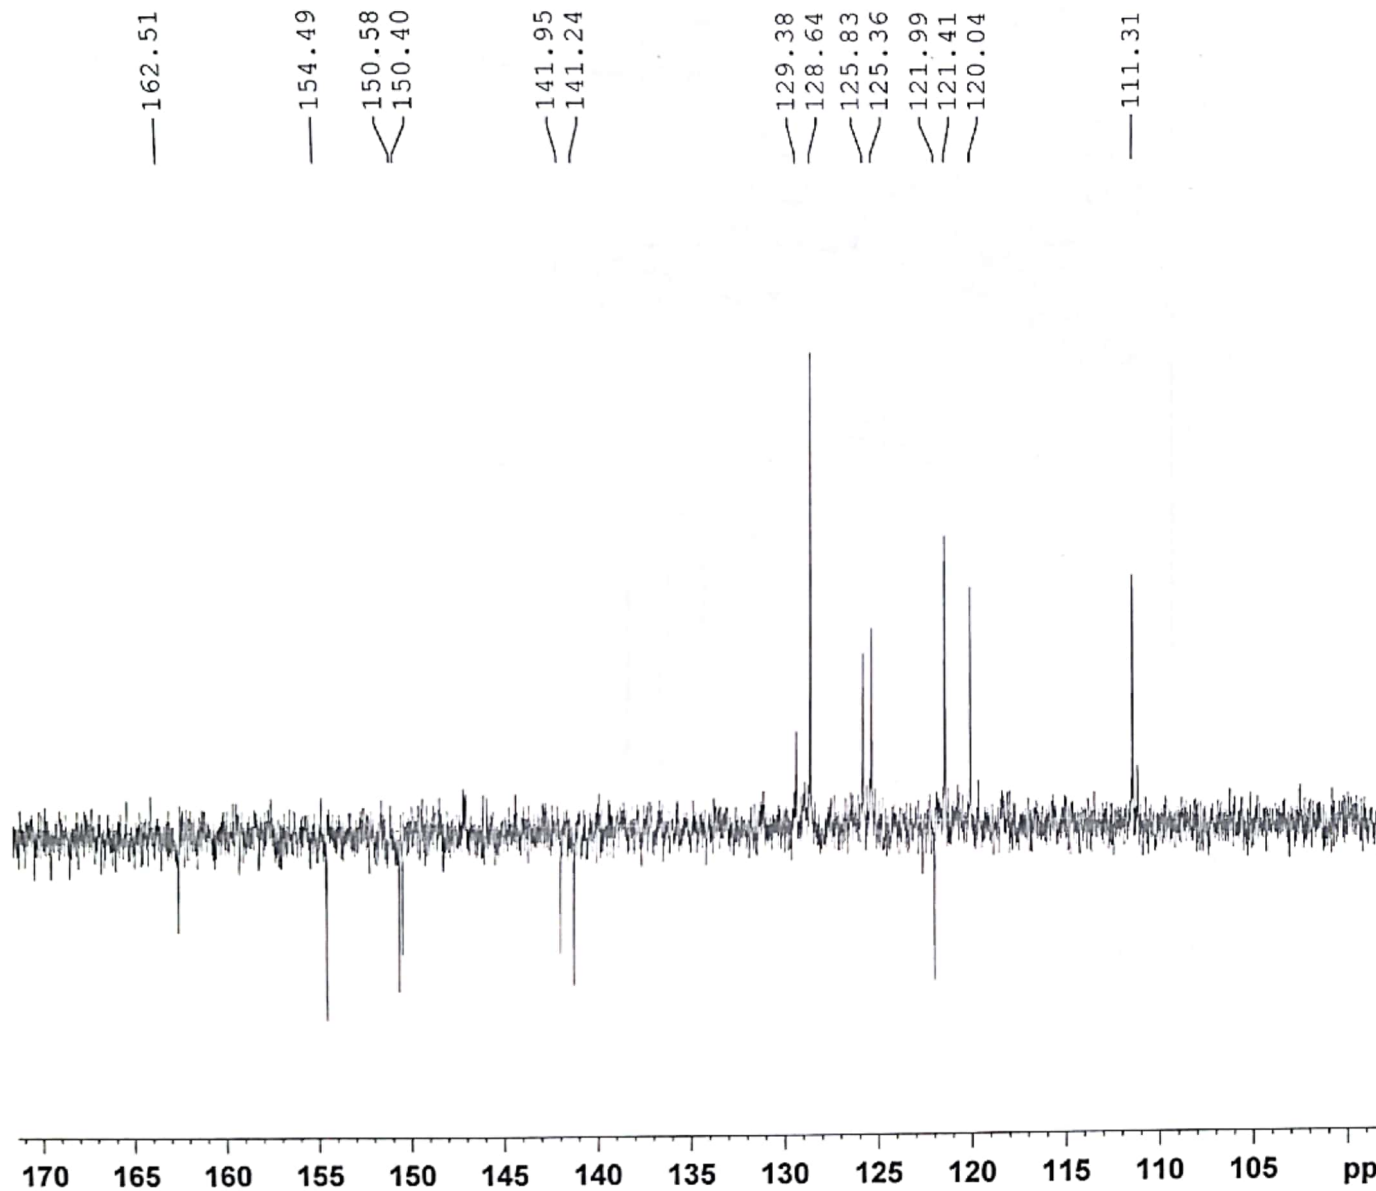

HEBA-11  
PROTON\_B9

11.507  
10.900  
10.785  
10.772  
8.400  
8.387  
8.286  
8.250  
8.216  
8.198  
8.176  
8.076  
8.064  
8.037  
8.027  
8.024  
8.016  
7.991  
7.879  
7.863  
7.857  
7.784  
7.726  
7.534  
7.410  
7.402  
7.138  
7.114  
6.993

*Cryst (11 new)  
25 Start (16)*

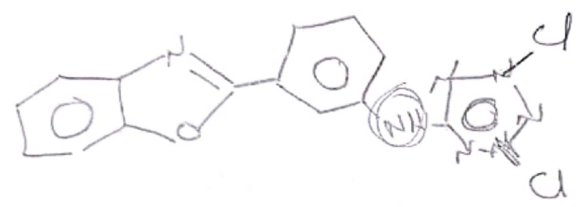

3

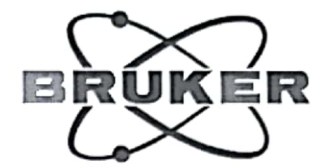

Current Data Parameters  
NAME Apr26-2015-nmr  
EXPNO 330  
PROCNO 1

F2 - Acquisition Parameters  
Date 20150426  
Time 12.28  
INSTRUM spect  
PROBHD 5 mm PABBO BB/  
PULPROG zg30  
TD 65536  
SOLVENT DMSO  
NS 16  
DS 2  
SWH 8012.820 Hz  
FIDRES 0.122266 Hz  
AQ 4.0894465 sec  
RG 147.93  
DW 62.400 usec  
DE 6.50 usec  
TE 293.7 K  
D1 1.00000000 sec  
TDO 1

==== CHANNEL f1 =====  
SFO1 400.1324710 MHz  
NUC1 1H  
P1 10.00 usec  
PLW1 16.00000000 W

F2 - Processing parameters  
SI 65536  
SF 400.1300000 MHz  
WDW EM  
SSB 0  
LB 0.10 Hz  
GB 0  
PC 1.00

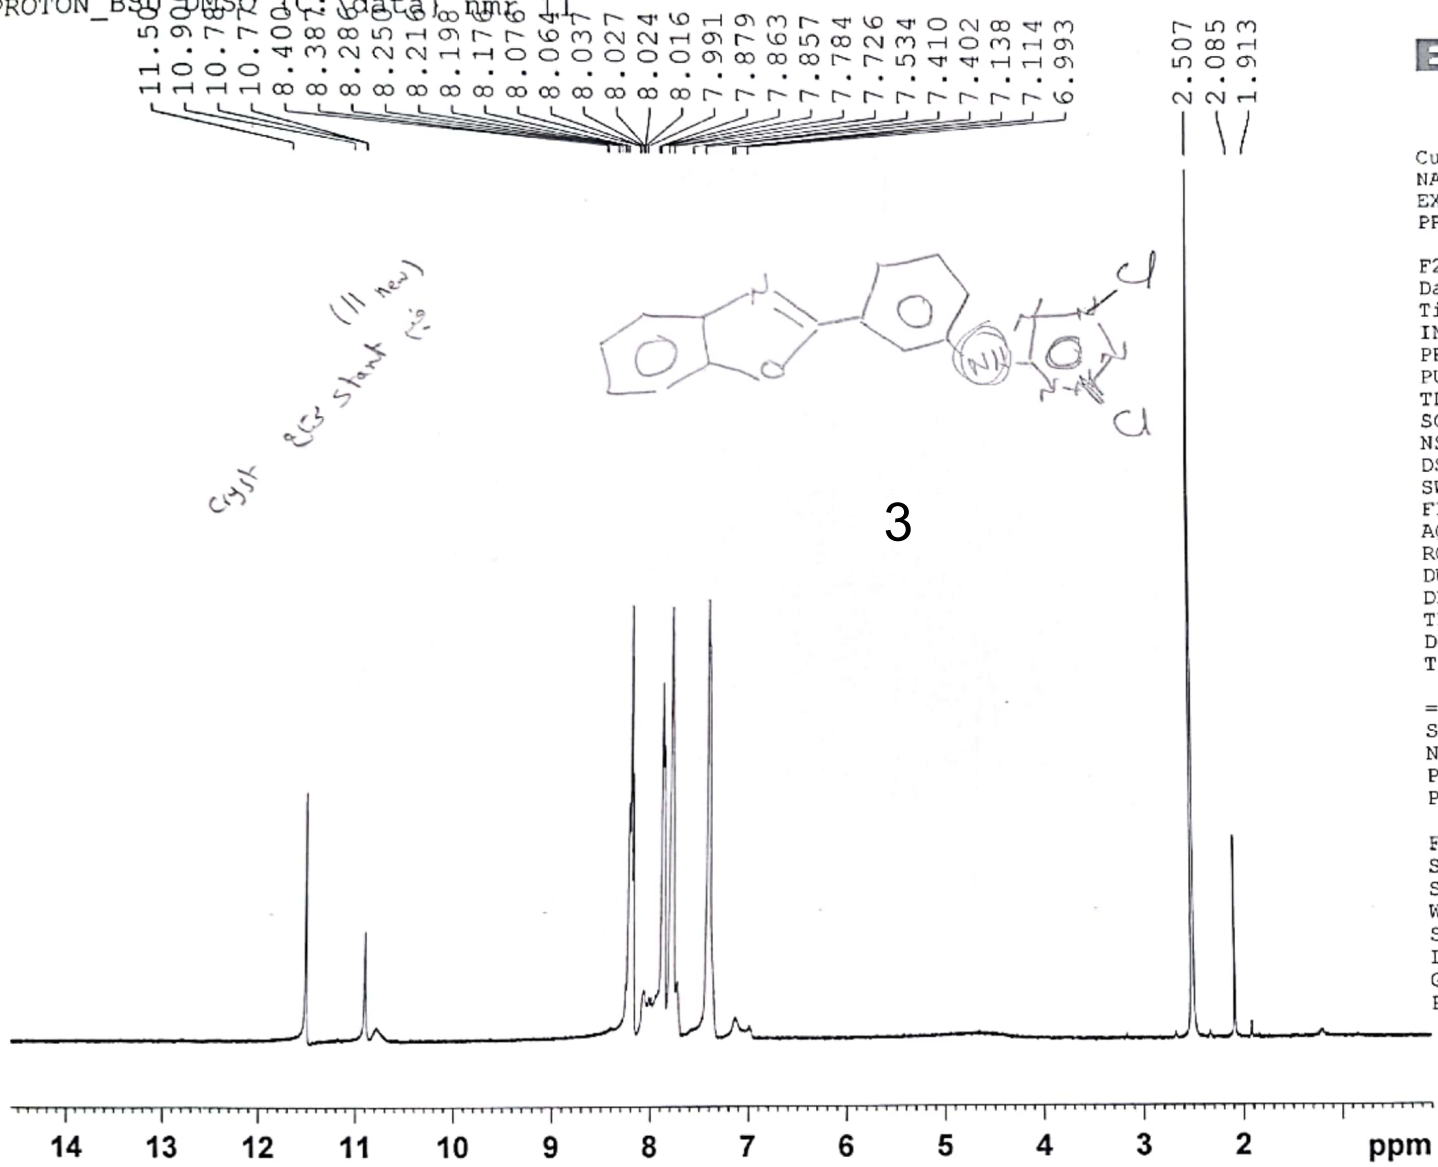

1.00 0.60 4.52 1.44 3.90 4.90 5.18 0.65 0.42 4.30 0.50

HEBA-11  
PROTON\_BSU DMSO {C:\data} nmr 11

8.400  
8.387  
8.286  
8.250  
8.216  
8.198  
8.176  
8.076  
8.064  
8.037  
8.027  
8.024  
8.016  
7.991  
7.879  
7.863  
7.857  
7.784  
7.726

— 7.534

< 7.410  
< 7.402

< 7.138  
< 7.114

— 6.993

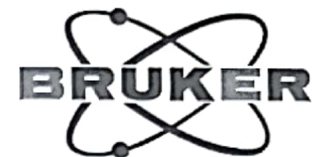

Current Data Parameters  
NAME Apr26-2015-nmr  
EXPNO 330  
PROCNO 1

F2 - Acquisition Parameters  
Date 20150426  
Time 12.28  
INSTRUM spect  
PROBHD 5 mm PABBO BB/  
PULPROG zg30  
TD 65536  
SOLVENT DMSO  
NS 16  
DS 2  
SWH 8012.820 Hz  
FIDRES 0.122266 Hz  
AQ 4.0894465 sec  
RG 147.93  
DW 62.400 usec  
DE 6.50 usec  
TE 293.7 K  
D1 1.00000000 sec  
TDO 1

==== CHANNEL f1 =====  
SFO1 400.1324710 MHz  
NUC1 1H  
P1 10.00 usec  
PLW1 16.00000000 W

F2 - Processing parameters  
SI 65536  
SF 400.1300000 MHz  
WDW EM  
SSB 0  
LB 0.10 Hz  
GB 0  
PC 1.00

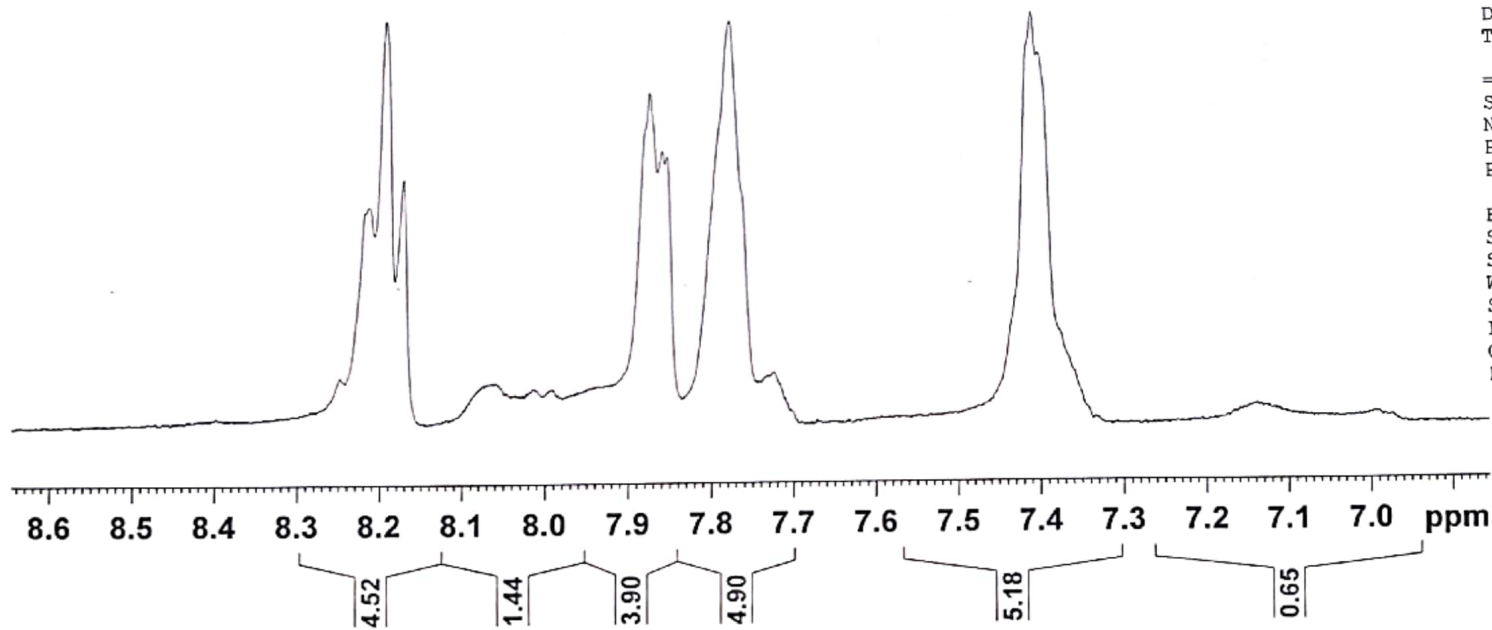

HEBA-12A  
PROTON\_BSU CDC13 {C:\data} nmr 13

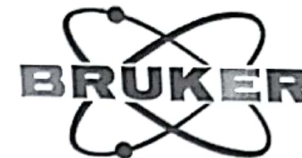

Current Data Parameters  
NAME May14-2015-nmr  
EXPNO 160  
PROCNO 1

F2 - Acquisition Parameters  
Date 20150514  
Time 11.26  
INSTRUM spect  
PROBHD 5 mm PABBO BB/  
PULPROG zg30  
TD 65536  
SOLVENT CDC13  
NS 16  
DS 2  
SWH 8012.820 Hz  
FIDRES 0.122266 Hz  
AQ 4.0894465 sec  
RG 147.93  
DW 62.400 usec  
DE 6.50 usec  
TE 293.6 K  
D1 1.00000000 sec  
TDO 1

==== CHANNEL f1 =====  
SFO1 400.1324710 MHz  
NUC1 1H  
P1 10.00 usec  
PLW1 16.00000000 W

F2 - Processing parameters  
SI 65536  
SF 400.1300000 MHz  
WDW EM  
SSB 0  
LB 0.10 Hz  
GB 0  
PC 1.00

8.247  
8.223  
8.197  
7.790  
7.600  
7.405  
7.368  
7.301  
7.284  
7.263  
7.205  
7.200  
7.194  
7.167  
7.147

4a

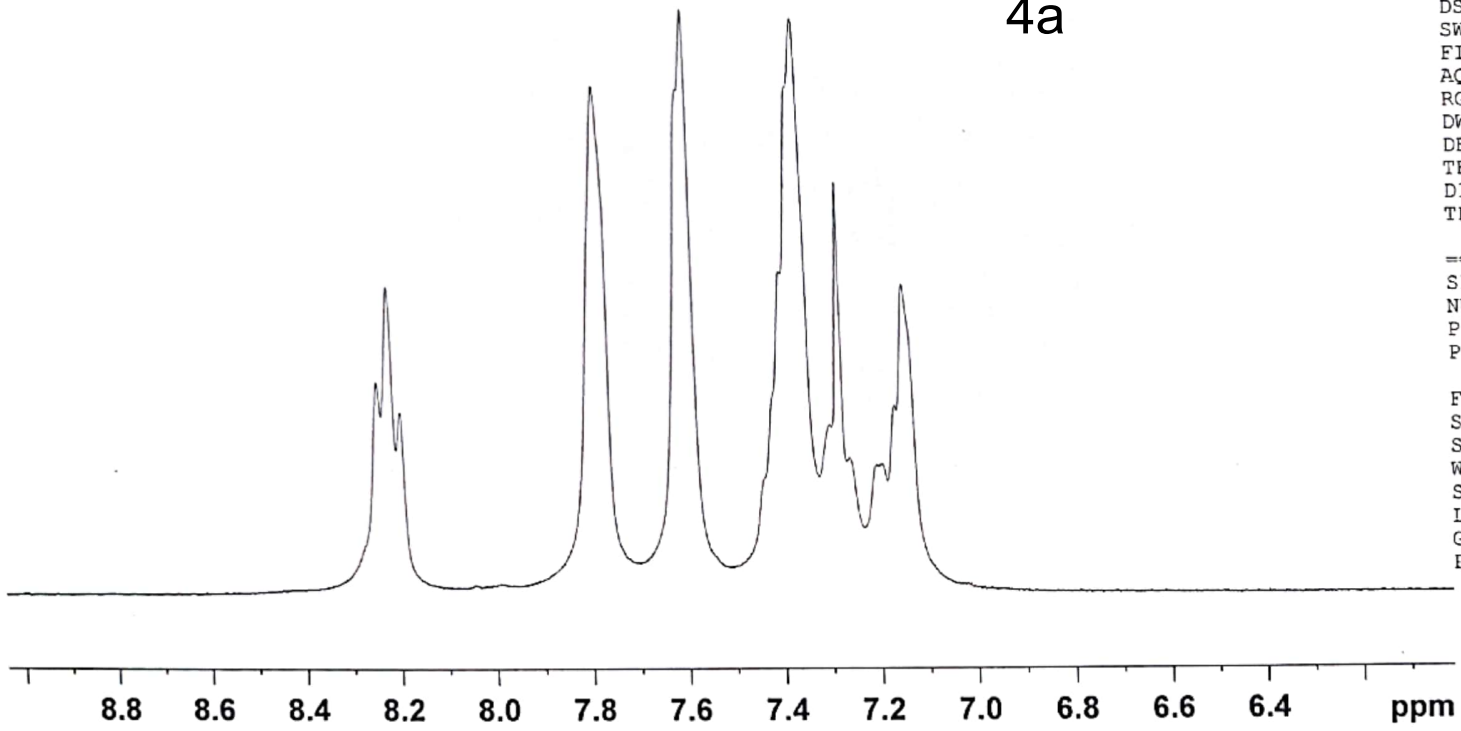

1.00  
1.53  
1.74  
2.19  
0.83  
1.22

HEBA-12A  
 DEPTQ-BSU DMSO (C:\data) nmr 18

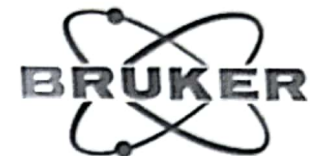

Current Data Parameters  
 NAME Jul21-2015-nmr  
 EXPMO 250  
 PROCNO 1

F2 - Acquisition Parameters  
 Date\_ 20150722  
 Time\_ 0.17  
 INSTRUM spect  
 PROBHD 5 mm PABBO BB/  
 PULPROG deptqppp  
 TD 65536  
 SOLVENT DMSO  
 NS 4000  
 DS 4  
 SWH 24038.461 Hz  
 FIDRES 0.366798 Hz  
 AQ 1.3631488 sec  
 RG 205.44  
 DW 20.800 usec  
 DE 6.50 usec  
 TE 300.8 K  
 CNST2 145.000000  
 CNST12 1.500000  
 D1 2.00000000 sec  
 D2 0.00344828 sec  
 D12 0.00002000 sec  
 C16 0.00020000 sec  
 TDO 1

----- CHANNEL f1 -----  
 SFO1 100.6228303 MHz  
 NUC1 13C  
 P1 10.00 usec  
 P13 2000.00 usec  
 PLW0 0 W  
 PLW1 66.00000000 W  
 SFO1(5) Crp60comp.4  
 SFO1(5) 0.500  
 SFOFF5 0 Hz  
 SPW5 10.08399963 W

----- CHANNEL f2 -----  
 SFO2 400.1312797 MHz  
 NUC2 1H  
 CPOPRG2 waltz16  
 P0 15.75 usec  
 P3 10.50 usec  
 P4 21.00 usec  
 P4 90.00 usec  
 PCPD2 16.00000000 W  
 PLW2 0.21779999 W

----- GRADIENT CHANNEL -----  
 GPNAM[1] SMO210.100  
 GPNAM[2] SMO210.100  
 GPNAM[3] SMO210.100  
 GP21 31.00 A  
 GP22 31.00 A  
 GP23 31.00 A  
 P16 1000.00 usec

F2 - Processing parameters  
 SI 32.68  
 SF 100.6127690 MHz  
 EQU EM  
 SSB 0  
 LB 1.00 Hz  
 GB 0  
 PC 1.40

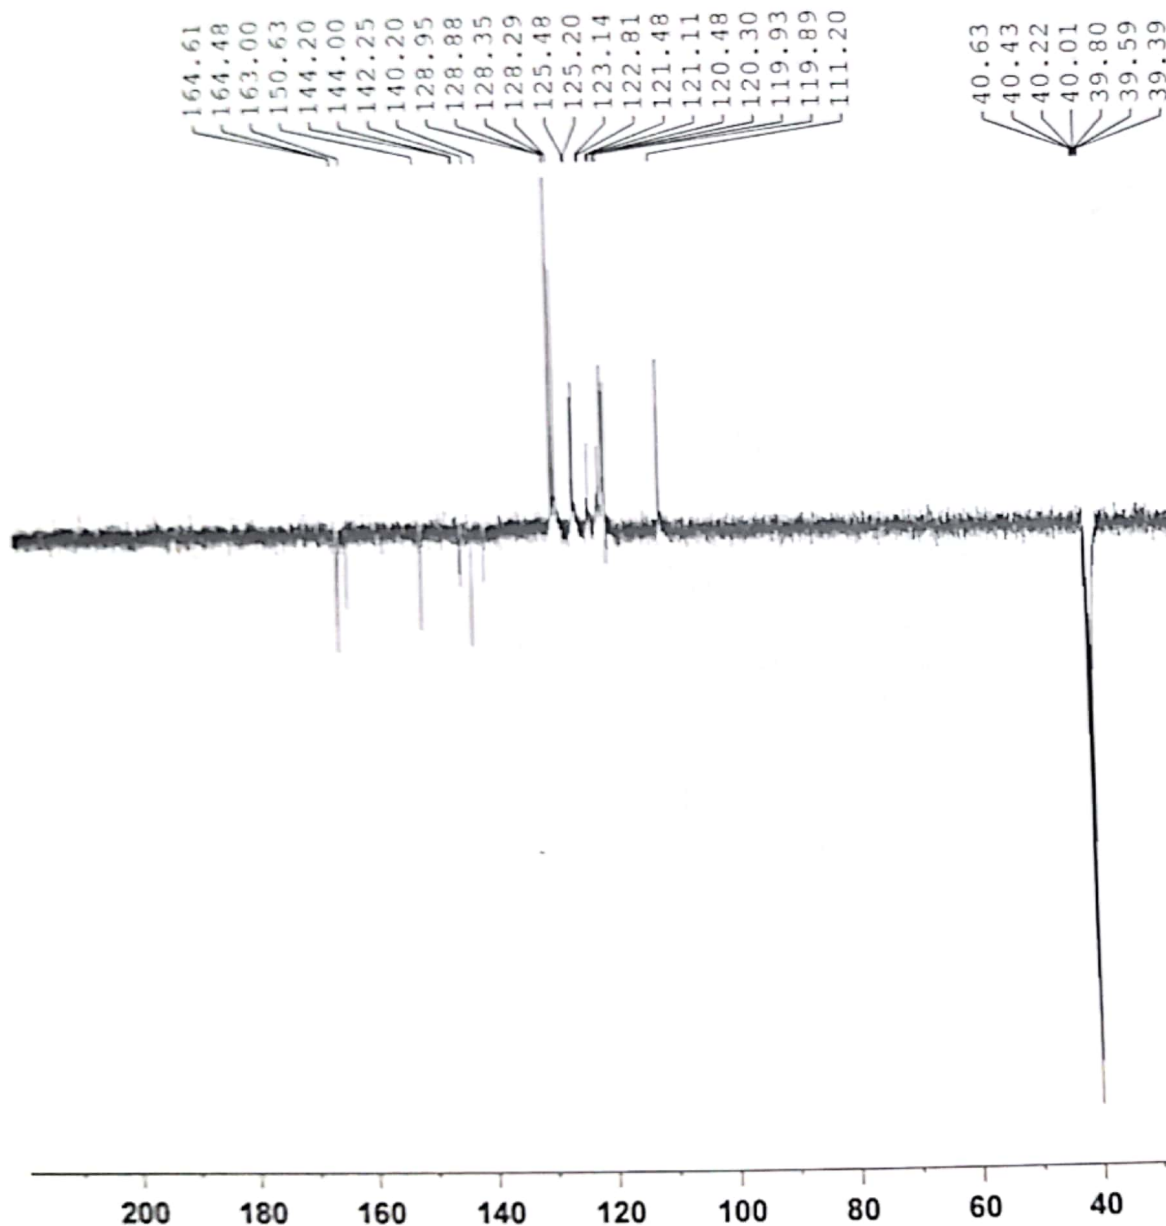



HEBA-12A  
DEPTQ-BSU DMSO {C:\data} nmr 18

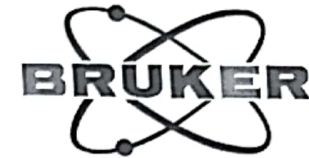

Current Data Parameters  
NAME Jul21-2015-nmr  
EXPNO 250  
PROCNO 1

F2 - Acquisition Parameters  
Date\_ 20150722  
Time 0.17  
INSTRUM spect  
PROBHD 5 mm PABBO BB/  
PULPROG deptqgppsp  
TD 65536  
SOLVENT DMSO  
NS 4000  
DS 4  
SWH 24038.461 Hz  
FIDRES 0.366798 Hz  
AQ 1.3631488 sec  
RG 205.44  
DW 20.800 usec  
DE 6.50 usec  
TE 300.8 K  
CNST2 145.0000000  
CNST12 1.5000000  
D1 2.00000000 sec  
D2 0.00344828 sec  
D12 0.00002000 sec  
D16 0.00020000 sec  
TDO 1

===== CHANNEL f1 =====  
SFO1 100.6228303 MHz  
NUC1 13C  
P1 10.00 usec  
P13 2000.00 usec  
PLW0 0 W  
PLW1 66.00000000 W  
SPNAM[5] Crp60comp.4  
SFOALS 0.500  
SPOFFS5 0 Hz  
SPW5 10.08399963 W

===== CHANNEL f2 =====  
SFO2 400.1312797 MHz  
NUC2 1H  
CPDPRG[2] waltz16  
P0 15.75 usec  
P3 10.50 usec  
P4 21.00 usec  
PCPD2 90.00 usec  
PLW2 16.00000000 W  
PLW12 0.21777999 W

===== GRADIENT CHANNEL =====  
GPNAM[1] SMSQ10.100  
GPNAM[2] SMSQ10.100  
GPNAM[3] SMSQ10.100  
GPZ1 31.00 %  
GPZ2 31.00 %  
GPZ3 31.00 %  
P16 1000.00 usec

F2 - Processing parameters  
SI 32768  
SF 100.6127690 MHz  
WDW EM  
SSB 0  
LB 1.00 Hz  
GB 0  
PC 1.40

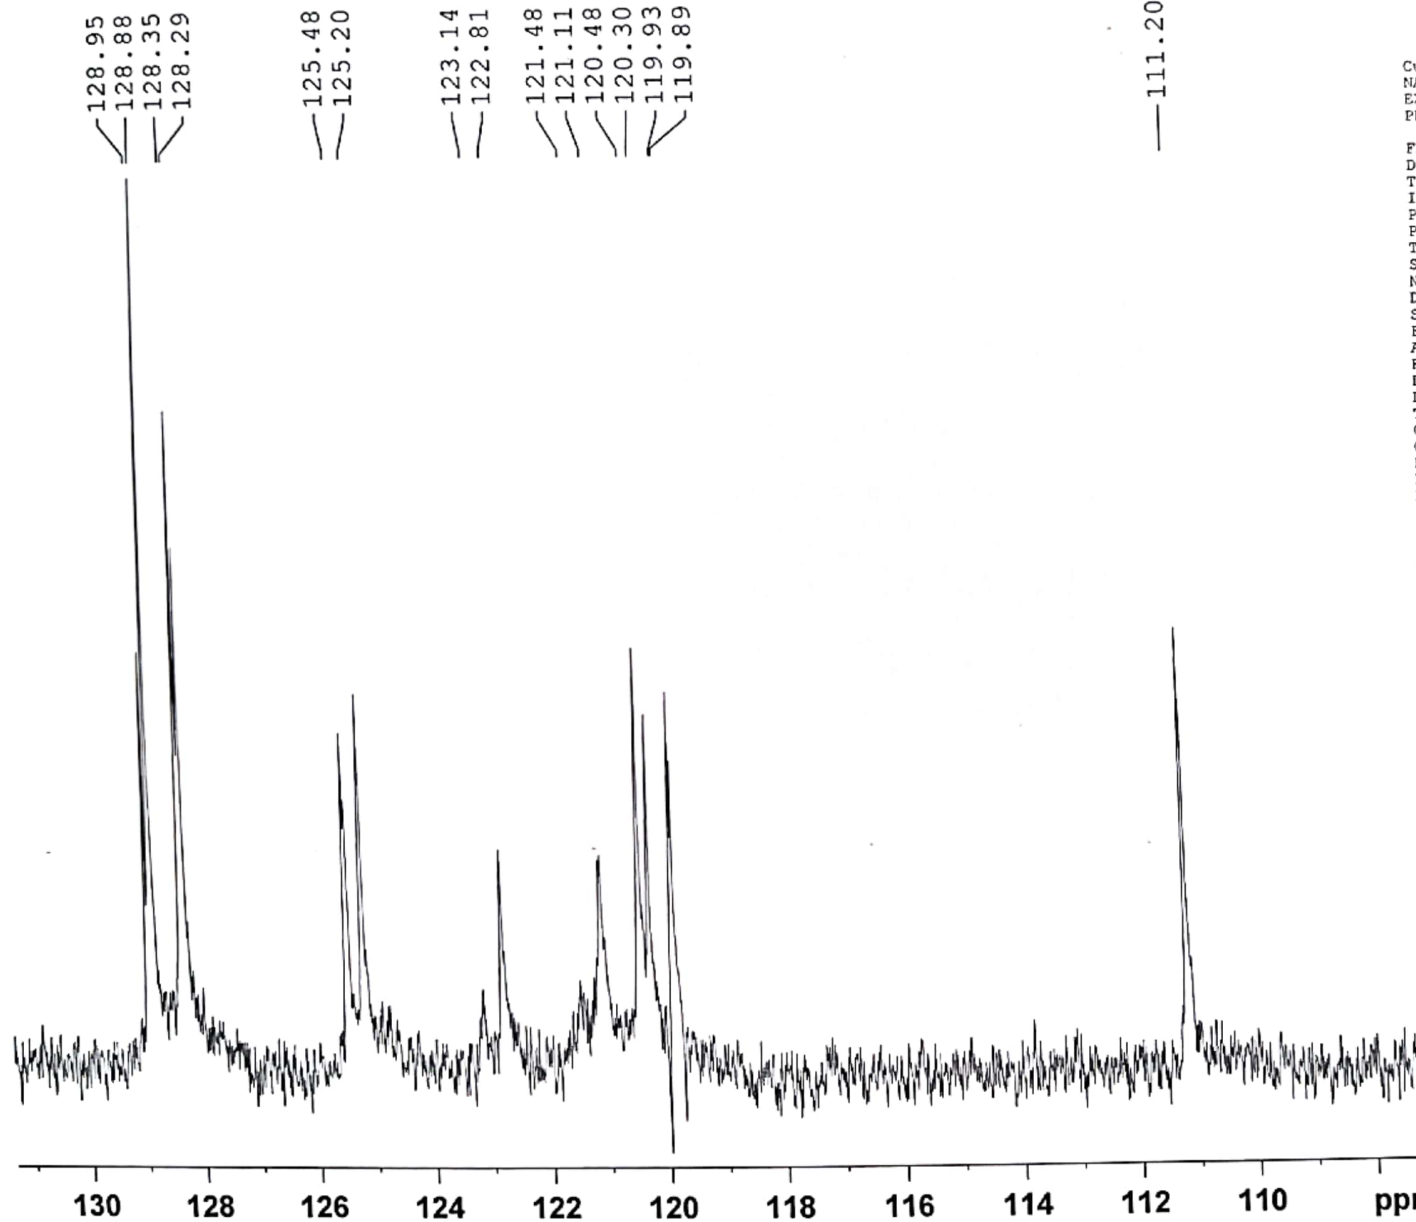

HEBA-12A  
DEPTQ-BSU DMSO {C:\data} nmr 18

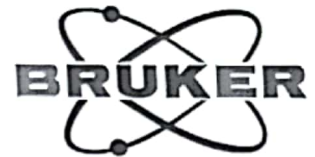

164.61  
164.48  
163.00

150.63

144.20  
144.00

142.25

140.20

Current Data Parameters  
NAME Jul21-2015-nmr  
EXPNO 250  
PROCNO 1

F2 - Acquisition Parameters  
Date 20150722  
Time 0.17  
INSTRUM spect  
PROBHD 5 mm PABBO BB/  
PULPROG deptqgppp  
TD 65536  
SOLVENT DMSO  
NS 4000  
DS 4  
SWH 24038.461 Hz  
FIDRES 0.366798 Hz  
AQ 1.3631488 sec  
RG 205.44  
DW 20.800 usec  
DE 6.50 usec  
TE 300.8 K  
CNST2 145.0000000  
CNST12 1.5000000  
D1 2.00000000 sec  
D2 0.00344829 sec  
D12 0.00002000 sec  
D16 0.00020000 sec  
TDO 1

==== CHANNEL f1 =====  
SFO1 100.6228303 MHz  
NUC1 13C  
P1 10.00 usec  
P13 2000.00 usec  
PLW0 0 W  
PLW1 66.00000000 W  
SPNAM[5] Crp60comp.4  
SFOALS 0.500  
SPOFFS5 0 Hz  
SPW5 10.08399963 W

==== CHANNEL f2 =====  
SFO2 400.1312797 MHz  
NUC2 1H  
CPDPRG[2] waltz16  
P0 15.75 usec  
P3 10.50 usec  
P4 21.00 usec  
PCPD2 90.00 usec  
PLW2 16.00000000 W  
PLW12 0.21777999 W

==== GRADIENT CHANNEL =====  
GPNAM[1] SMSQ10.100  
GPNAM[2] SMSQ10.100  
GPNAM[3] SMSQ10.100  
GPZ1 31.00 %  
GPZ2 31.00 %  
GPZ3 31.00 %  
P16 1000.00 usec

F2 - Processing parameters  
SI 32768  
SF 100.6127690 MHz  
WDW EM  
SSB 0  
LB 1.00 Hz  
GB 0  
PC 1.40

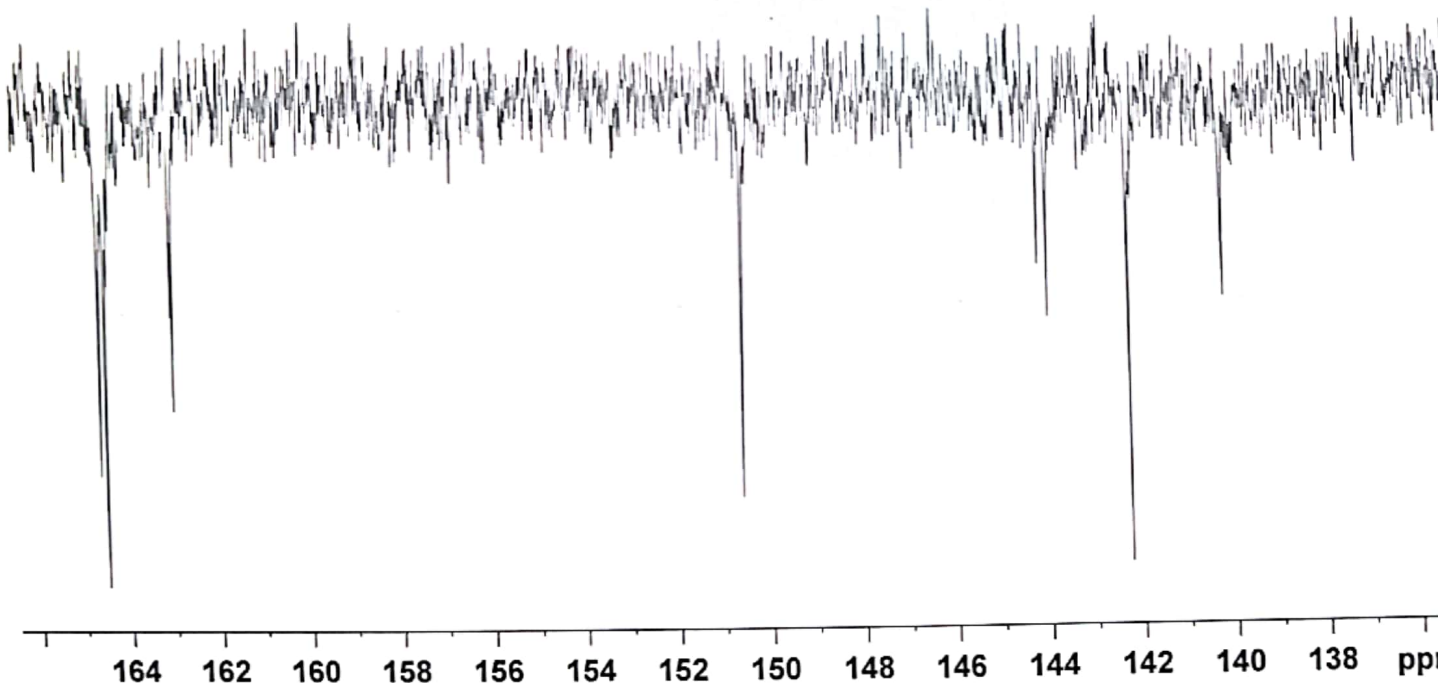

HEBA-12B  
 PROTON\_BSU CDC13 {C:\data} nmr 20

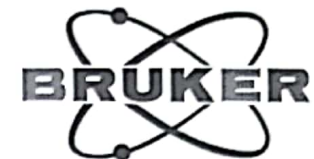

Current Data Parameters  
 NAME May19-2015-nmr  
 EXPNO 410  
 PROCNO 1

F2 - Acquisition Parameters  
 Date\_ 20150519  
 Time\_ 13.00  
 INSTRUM spect  
 PROBHD 5 mm PABBO BB/  
 PULPROG zg30  
 TD 65536  
 SOLVENT CDC13  
 NS 16  
 DS 2  
 SWH 8012.820 Hz  
 FIDRES 0.122266 Hz  
 AQ 4.0894465 sec  
 RG 147.93  
 DW 62.400 usec  
 DE 6.50 usec  
 TE 295.8 K  
 D1 1.00000000 sec  
 TD0 1

===== CHANNEL f1 =====  
 SF01 400.1324710 MHz  
 NUC1 1H  
 P1 10.00 usec  
 PLW1 16.00000000 W

F2 - Processing parameters  
 SI 65536  
 SF 400.1300000 MHz  
 WDW EM  
 SSB 0  
 LB 0.10 Hz  
 GB 0  
 PC 1.00

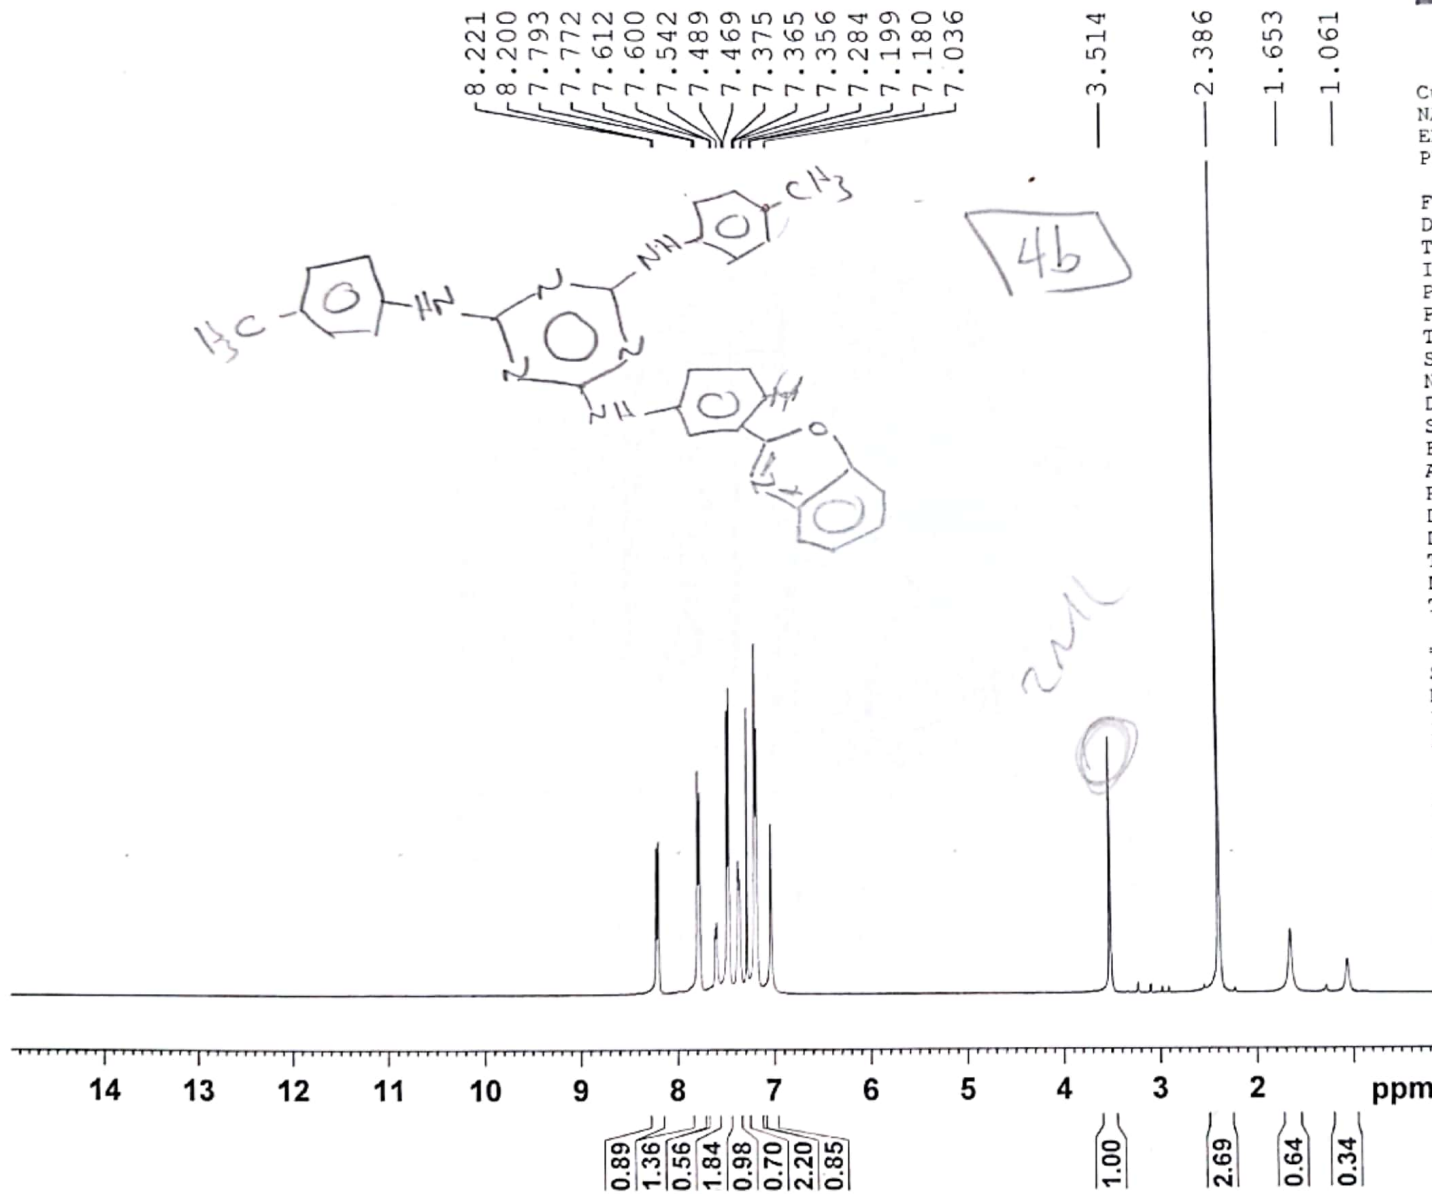

HEBA-12B  
 PROTON\_BSU CDC13 {C:\data} nmr 20

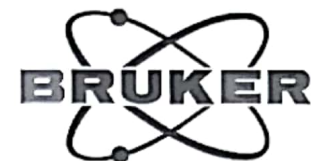

Current Data Parameters  
 NAME May19-2015-nmr  
 EXPNO 410  
 PROCNO 1

F2 - Acquisition Parameters  
 Date\_ 20150519  
 Time\_ 13.00  
 INSTRUM spect  
 PROBHD 5 mm PABBO BB/  
 PULPROG zg30  
 TD 65536  
 SOLVENT CDC13  
 NS 16  
 DS 2  
 SWH 8012.820 Hz  
 FIDRES 0.122266 Hz  
 AQ 4.0894465 sec  
 RG 147.93  
 DW 62.400 usec  
 DE 6.50 usec  
 TE 295.8 K  
 D1 1.00000000 sec  
 TD0 1

===== CHANNEL f1 =====  
 SF01 400.1324710 MHz  
 NUC1 1H  
 P1 10.00 usec  
 PLW1 16.00000000 W

F2 - Processing parameters  
 SI 65536  
 SF 400.1300000 MHz  
 WDW EM  
 SSB 0  
 LB 0.10 Hz  
 GB 0  
 PC 1.00

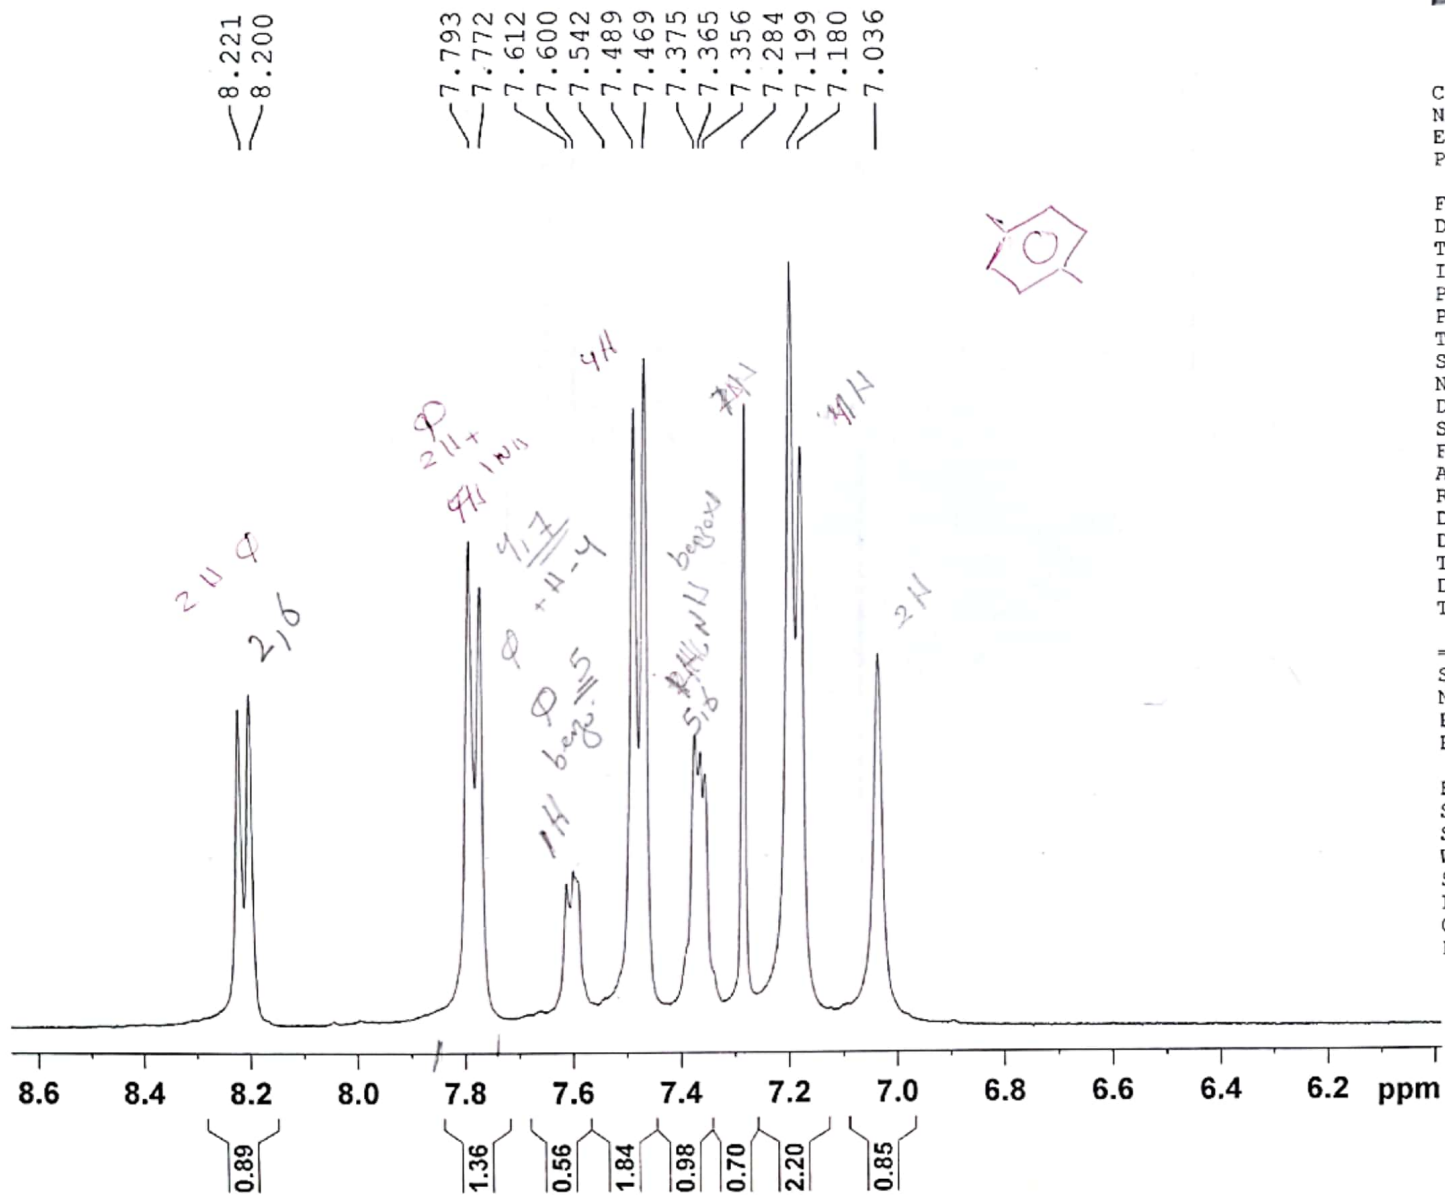

HEBA-12B  
DEPTQ-BSU CDC13 {C:\data} nmr 20

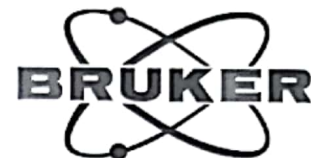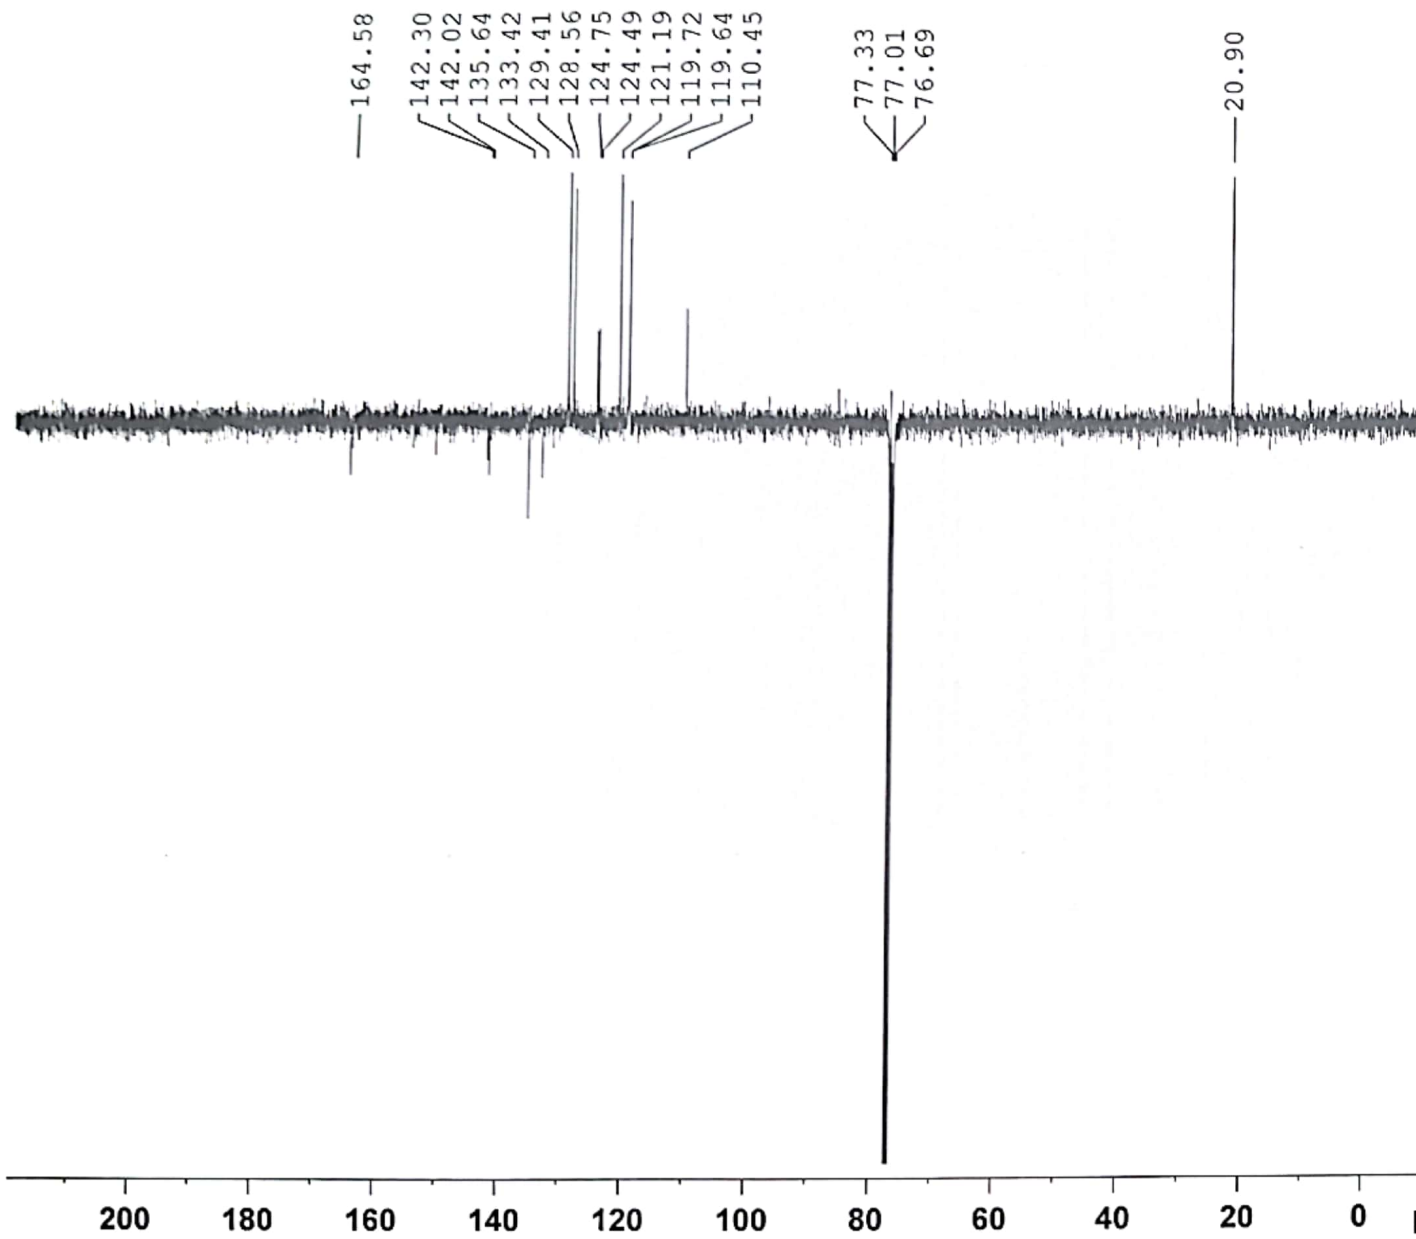

164.58  
142.30  
142.02  
135.64  
133.42  
129.41  
128.56  
124.75  
124.49  
121.19  
119.72  
119.64  
110.45

77.33  
77.01  
76.69

20.90

Current Data Parameters  
NAME Jun28-2015-nmr  
EXPNO 280  
PROCNO 1

F2 - Acquisition Parameters  
Date\_ 20150629  
Time 8.54  
INSTRUM spect  
PROBHD 5 mm PABBO BB/  
PULPROG deptqqpsp  
TD 65536  
SOLVENT CDC13  
NS 4000  
DS 4  
SWH 24038.461 Hz  
FIDRES 0.366798 Hz  
AQ 1.3631488 sec  
RG 205.44  
DW 20.800 usec  
DE 6.50 usec  
TE 298.2 K  
CNST2 145.0000000  
CNST12 1.5000000  
D1 2.0000000 sec  
D2 0.00344828 sec  
D12 0.00002000 sec  
D16 0.00002000 sec  
TDO 1

===== CHANNEL f1 =====  
SFO1 100.6228303 MHz  
NUC1 13C  
P1 10.00 usec  
P13 2000.00 usec  
PLW0 0 W  
PLW1 66.00000000 W  
SFOAL5 Crp60comp.4  
SFOALS 0.500  
SFOFFS5 0 Hz  
SFO5 10.08399963 W

===== CHANNEL f2 =====  
SFO2 400.1312797 MHz  
NUC2 1H  
CPDPRG2 waltz16  
P0 15.75 usec  
P3 10.50 usec  
P4 21.00 usec  
PCPD2 90.00 usec  
PLW2 16.00000000 W  
PLW12 0.21777999 W

===== GRADIENT CHANNEL =====  
GPNAM[1] SMSQ10.100  
GPNAM[2] SMSQ10.100  
GPNAM[3] SMSQ10.100  
GPZ1 31.00 %  
GPZ2 31.00 %  
GPZ3 31.00 %  
P16 1000.00 usec

F2 - Processing parameters  
SI 32768  
SF 100.6127690 MHz  
WDW EM  
SSB 0  
LB 1.00 Hz  
GB 0  
PC 1.40

HEBA-12B  
DEPTQ-BSU CDC13 (C:\data) nmr 20

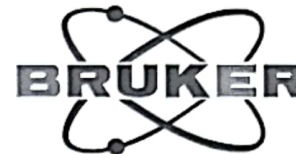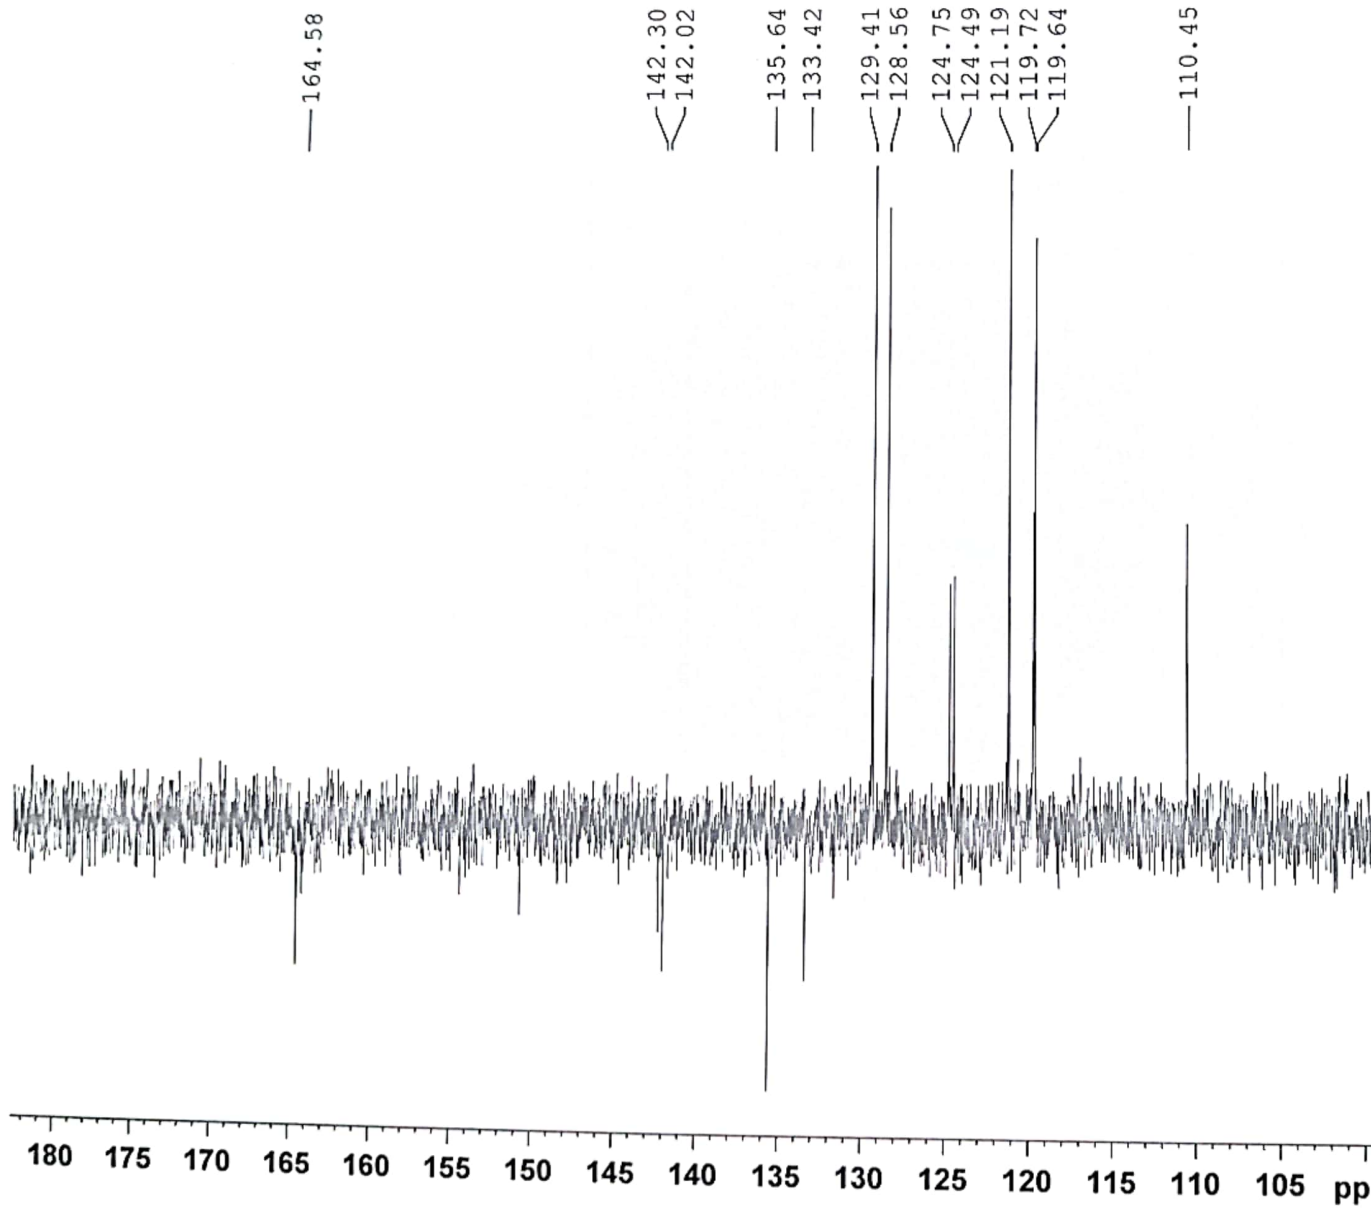

Current Data Parameters  
NAME Jun28-2015-nmr  
EXPNO 280  
PROCNO 1

F2 - Acquisition Parameters  
Date\_ 20150629  
Time\_ 8.54  
INSTRUM spect  
PROBHD 5 mm PABBO BB/  
PULPROG deptgpgsp  
TD 65536  
SOLVENT CDC13  
NS 4000  
DS 4  
SWH 24038.461 Hz  
FIDRES 0.366798 Hz  
AQ 1.3631488 sec  
RG 205.44  
DW 20.800 usec  
DE 6.50 usec  
TE 298.2 K  
CNST2 145.000000  
CNST12 1.500000  
D1 2.0000000 sec  
D2 0.00344828 sec  
D12 0.00002000 sec  
D16 0.00020000 sec  
TD0 1

===== CHANNEL f1 =====  
SFO1 100.6228303 MHz  
NUC1 13C  
P1 10.00 usec  
P13 2000.00 usec  
PLW0 0 W  
PLW1 66.00000000 W  
SPNAM[5] Crp60comp.4  
SPOALS 0.500  
SPOFFS5 0 Hz  
SPW5 10.08399963 W

===== CHANNEL f2 =====  
SFO2 400.1312797 MHz  
NUC2 1H  
CPDPRG2 waltz16  
P0 15.75 usec  
P3 10.50 usec  
P4 21.00 usec  
PCPD2 90.00 usec  
PLW2 16.00000000 W  
PLW12 0.21777999 W

----- GRADIENT CHANNEL -----  
GPNAM[1] SMSQ10.100  
GPNAM[2] SMSQ10.100  
GPNAM[3] SMSQ10.100  
GPZ1 31.00 %  
GPZ2 31.00 %  
GPZ3 31.00 %  
P16 1000.00 usec

F2 - Processing parameters  
SI 32768  
SF 100.6127690 MHz  
WDW EM  
SSB 0  
LB 1.00 Hz  
GB 0  
PC 1.40

HEBA-12B  
DEPTQ-BSU CDC13 {C:\data} nmr 20

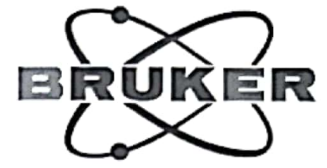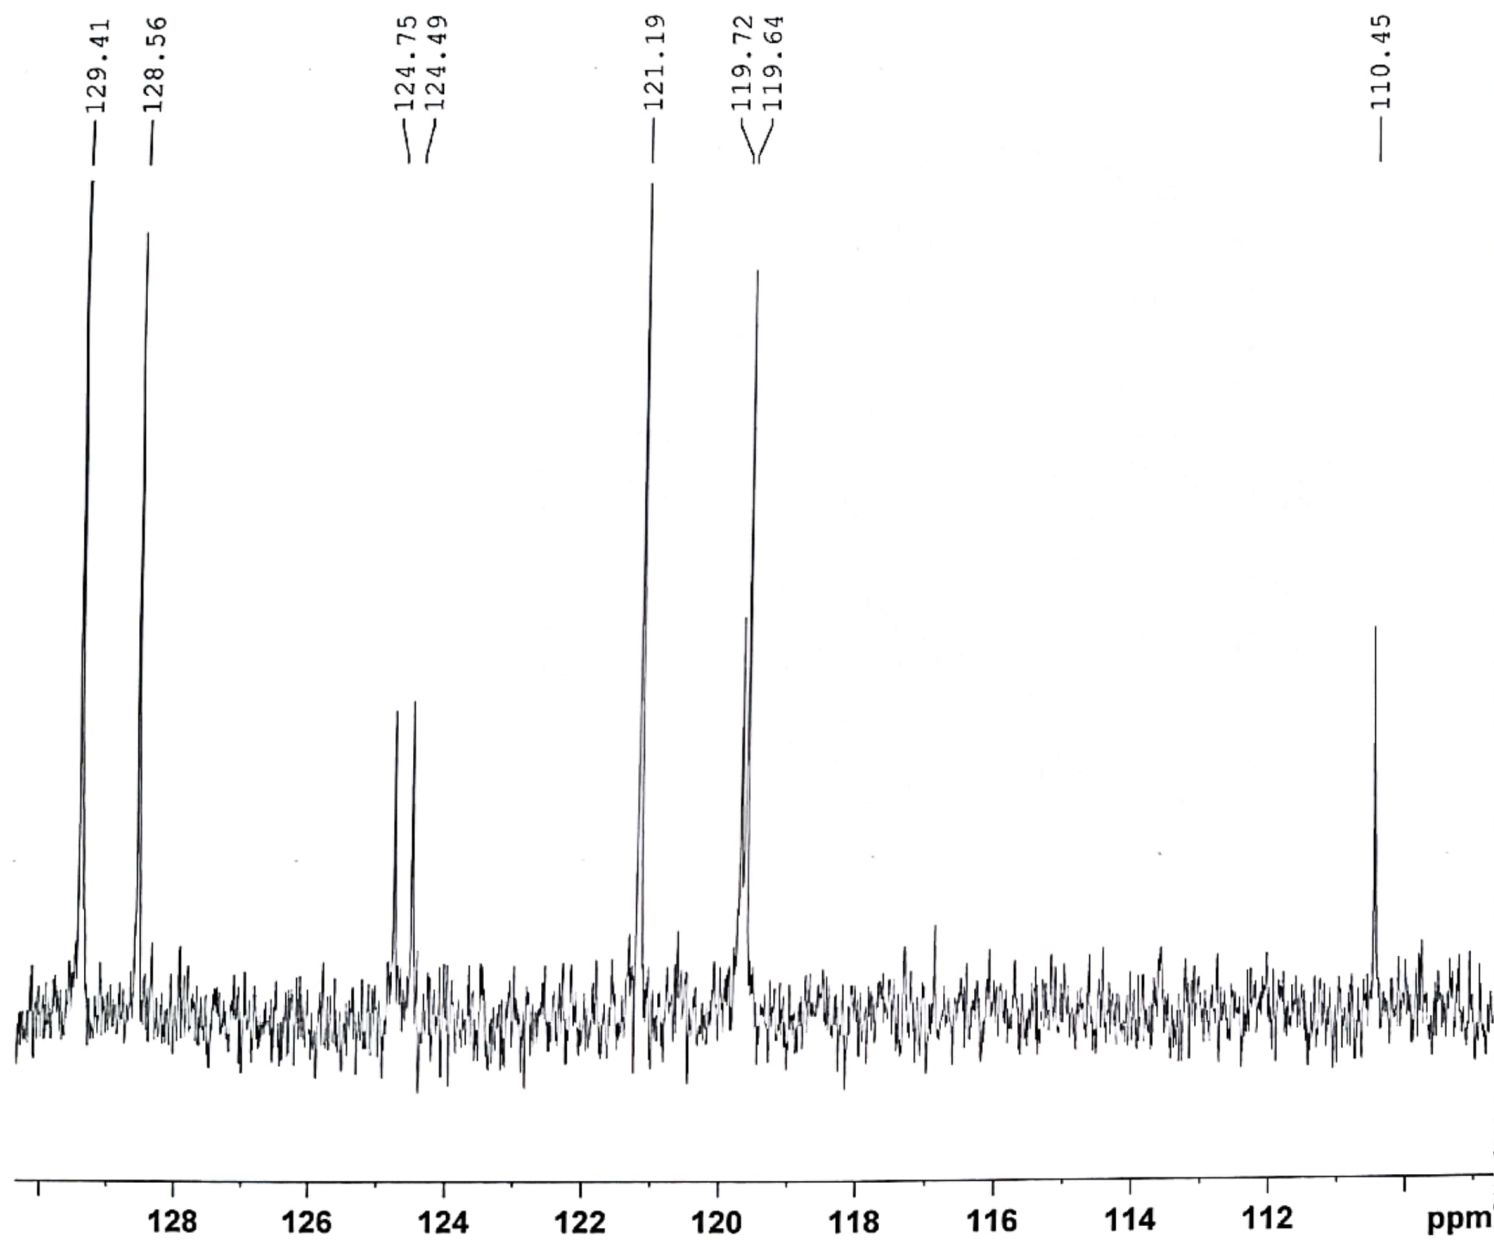

Current Data Parameters  
NAME Jun28-2015-nmr  
EXPNO 280  
PROCNO 1

F2 - Acquisition Parameters  
Date\_ 20150629  
Time 8.54  
INSTRUM spect  
PROBHD 5 mm PABBO BB/  
PULPROG deptqgppsp  
TD 65536  
SOLVENT CDC13  
NS 4000  
DS 4  
SWH 24038.461 Hz  
FIDRES 0.366798 Hz  
AQ 1.3631488 sec  
RG 205.44  
DW 20.800 usec  
DE 6.50 usec  
TE 298.2 K  
CNST2 145.0000000  
CNST12 1.5000000  
D1 2.0000000 sec  
D2 0.00344828 sec  
D12 0.00002000 sec  
D16 0.00020000 sec  
TD0 1

===== CHANNEL f1 =====  
SFO1 100.6228303 MHz  
NUC1 13C  
P1 10.00 usec  
P13 2000.00 usec  
PLW0 0 W  
PLW1 66.00000000 W  
SPNAM[5] Crp60comp.4  
SFOAL5 0.500  
SFOFFS5 0 Hz  
SPW5 10.08399963 W

===== CHANNEL f2 =====  
SFO2 400.1312797 MHz  
NUC2 1H  
CPDPRG[2] waltz16  
P0 15.75 usec  
P3 10.50 usec  
P4 21.00 usec  
PCPD2 90.00 usec  
PLW2 16.00000000 W  
PLW12 0.21777999 W

===== GRADIENT CHANNEL =====  
GPNAM[1] SMSQ10.100  
GPNAM[2] SMSQ10.100  
GPNAM[3] SMSQ10.100  
GPZ1 31.00 %  
GPZ2 31.00 %  
GPZ3 31.00 %  
P16 1000.00 usec

F2 - Processing parameters  
SI 32768  
SF 100.6127690 MHz  
WDW EM  
SSB 0  
LB 1.00 Hz  
GB 0  
PC 1.40

HEBA-12B  
DEPTQ-BSU CDC13 {C:\data} nmr 20

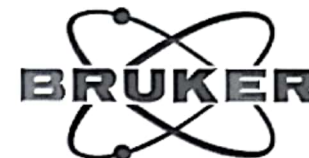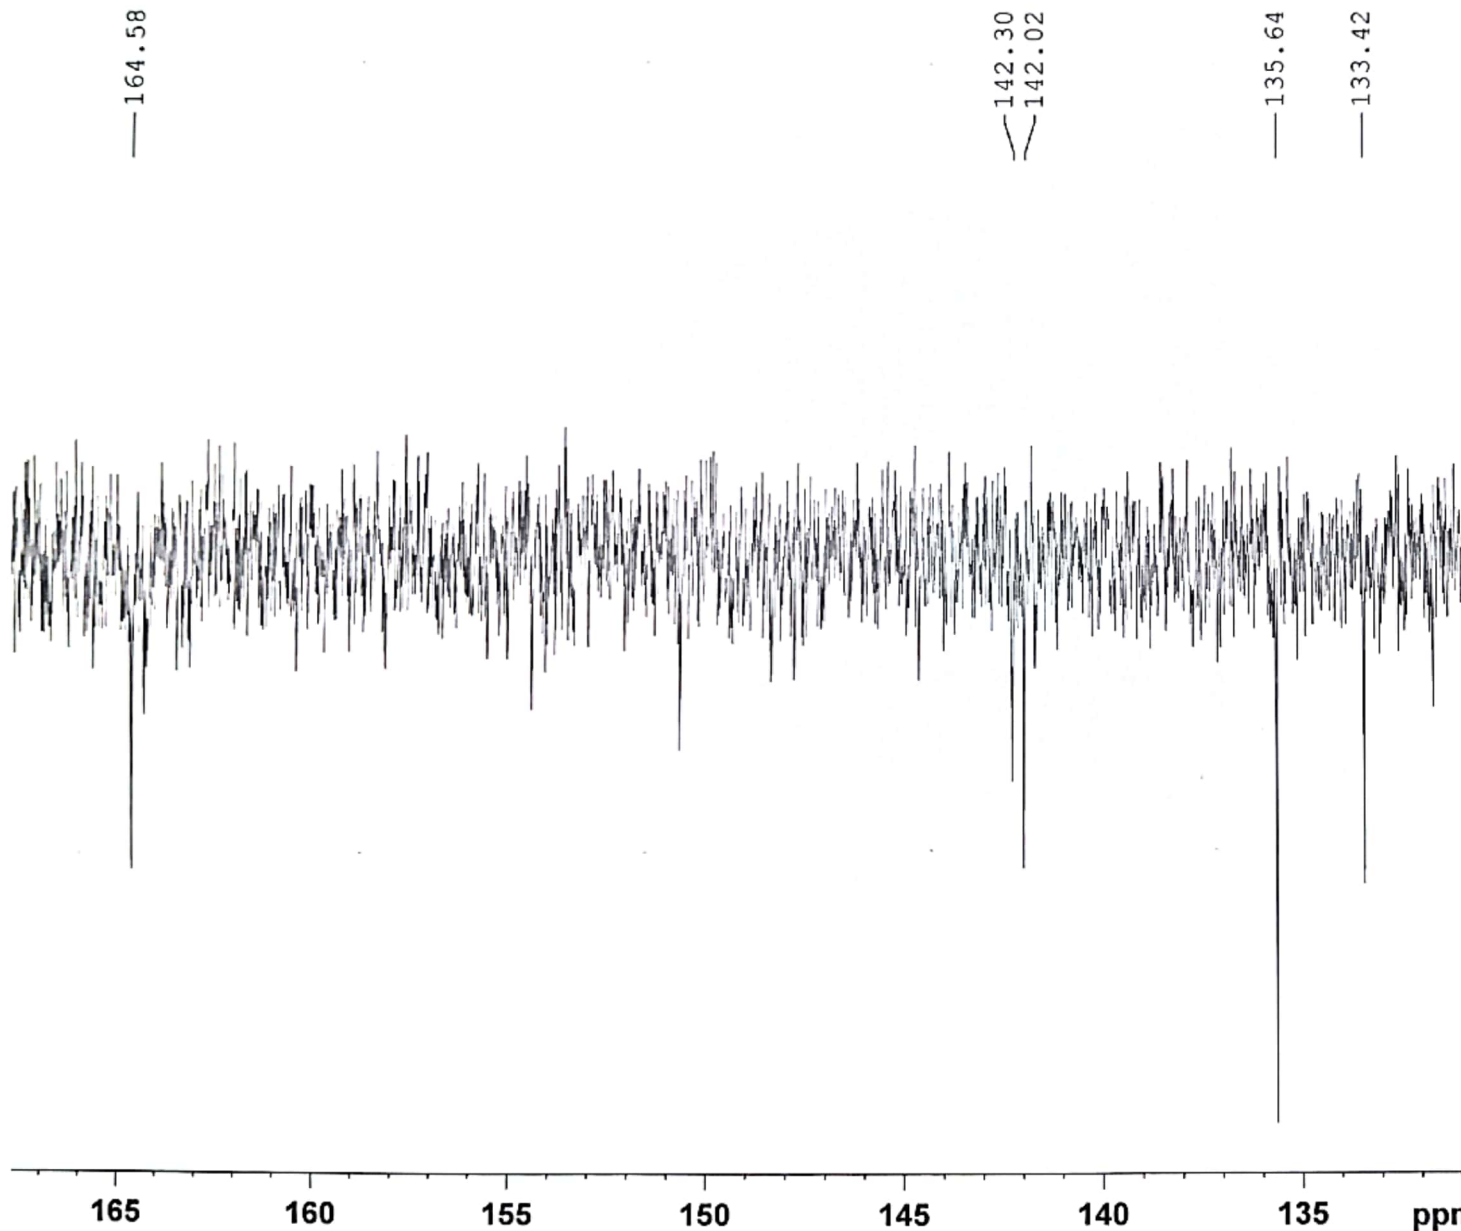

Current Data Parameters  
NAME Jun28-2015-nmr  
EXPNO 280  
PROCNO 1

F2 - Acquisition Parameters  
Date\_ 20150629  
Time 8.54  
INSTRUM spect  
PROBHD 5 mm PABBO BB/  
PULPROG deptqqpap  
TD 65536  
SOLVENT CDC13  
NS 4000  
DS 4  
SWH 24038.461 Hz  
FIDRES 0.366798 Hz  
AQ 1.3631488 sec  
RG 205.44  
DW 20.800 usec  
DE 6.50 usec  
TE 298.2 K  
CNST2 145.0000000  
CNST12 1.5000000  
D1 2.00000000 sec  
D2 0.00344828 sec  
D12 0.00002000 sec  
D16 0.00020000 sec  
TD0 1

===== CHANNEL f1 =====  
SF01 100.6228303 MHz  
NUC1 13C  
P1 10.00 usec  
P13 2000.00 usec  
PLW0 0 W  
PLW1 66.00000000 W  
SPNAM[5] Crp60ccmp.4  
SPOALS 0.500  
SPOFFS5 0 Hz  
SPW5 10.08399963 W

===== CHANNEL f2 =====  
SF02 400.1312797 MHz  
NUC2 1H  
CPDPRG[2] waltz16  
P0 15.75 usec  
P3 10.50 usec  
P4 21.00 usec  
PCPD2 90.00 usec  
PLW2 16.00000000 W  
PLW12 0.21777999 W

===== GRADIENT CHANNEL =====  
GPNAM[1] SMSQ10.100  
GPNAM[2] SMSQ10.100  
GPNAM[3] SMSQ10.100  
GPZ1 31.00 %  
GPZ2 31.00 %  
GPZ3 31.00 %  
P16 1000.00 usec

F2 - Processing parameters  
SI 32768  
SF 100.6127690 MHz  
WDW EM  
SSB 0  
LB 1.00 Hz  
GB 0  
PC 1.40



HEBA-M12D  
PROTON\_BSU DMSO {C:\data} nmr 20

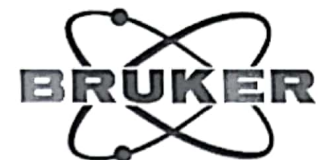

Current Data Parameters  
NAME Jun16-2015-nmr  
EXPNO 120  
PROCNO 1

F2 - Acquisition Parameters  
Date\_ 20150616  
Time\_ 10.42  
INSTRUM spect  
PROBHD 5 mm PABBO BB/  
PULPROG zg30  
TD 65536  
SOLVENT DMSO  
NS 16  
DS 2  
SWH 8012.820 Hz  
FIDRES 0.122266 Hz  
AQ 4.0894465 sec  
RG 147.93  
DW 62.400 usec  
DE 6.50 usec  
TE 296.9 K  
D1 1.00000000 sec  
TD0 1

==== CHANNEL f1 =====  
SFO1 400.1324710 MHz  
NUC1 1H  
P1 10.00 usec  
PLW1 16.00000000 W

F2 - Processing parameters  
SI 65536  
SF 400.1300000 MHz  
WDW EM  
SSB 0  
LB 0.10 Hz  
GB 0  
PC 1.00

4c

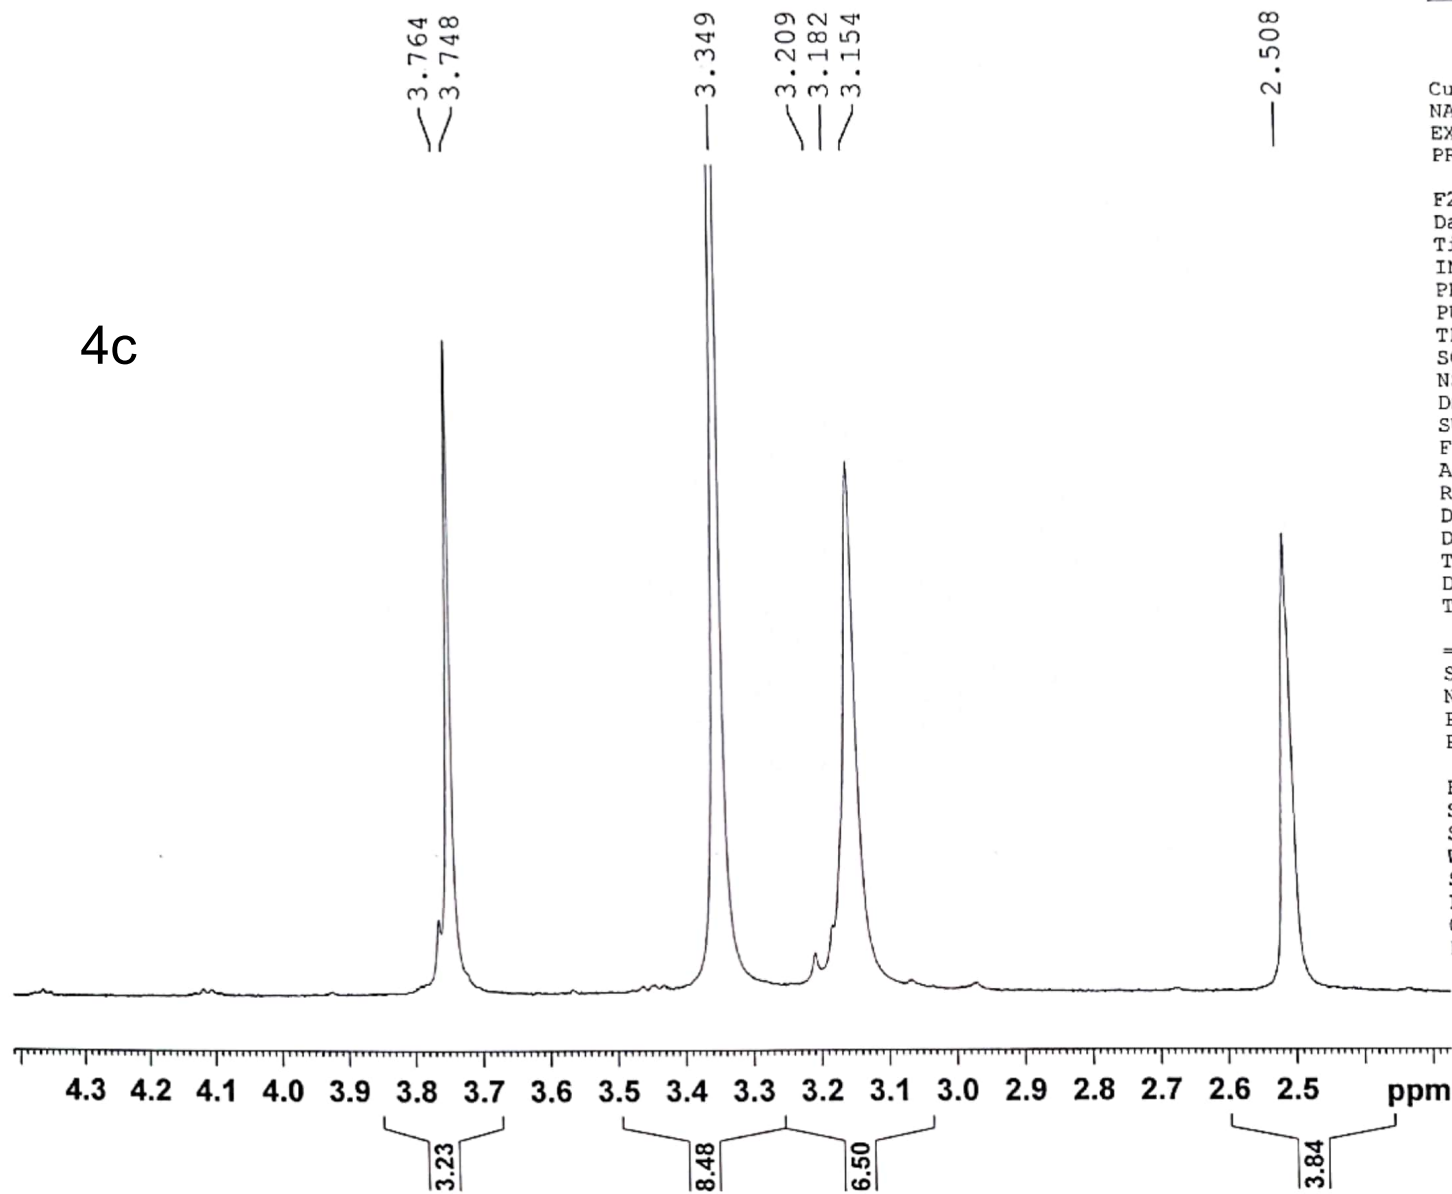

HEBA-M12D  
 PROTON\_BSU DMSO (C:\data) nmr 20

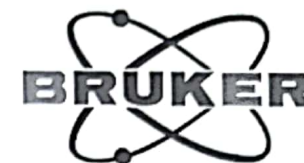

Current Data Parameters  
 NAME Jun16-2015-nmr  
 EXPNO 120  
 PROCNO 1

F2 - Acquisition Parameters  
 Date\_ 20150616  
 Time\_ 10.42  
 INSTRUM spect  
 PROBHD 5 mm PABBO BB/  
 PULPROG zg30  
 TD 65536  
 SOLVENT DMSO  
 NS 16  
 DS 2  
 SWH 8012.820 Hz  
 FIDRES 0.122266 Hz  
 AQ 4.0894465 sec  
 RG 147.93  
 DW 62.400 usec  
 DE 6.50 usec  
 TE 296.9 K  
 D1 1.00000000 sec  
 TDO 1

===== CHANNEL f1 =====  
 SF01 400.1324710 MHz  
 NUC1 1H  
 P1 10.00 usec  
 PLW1 16.00000000 W

F2 - Processing parameters  
 SI 65536  
 SF 400.1300000 MHz  
 WDW EM  
 SSB 0  
 LB 0.10 Hz  
 GB 0  
 PC 1.00

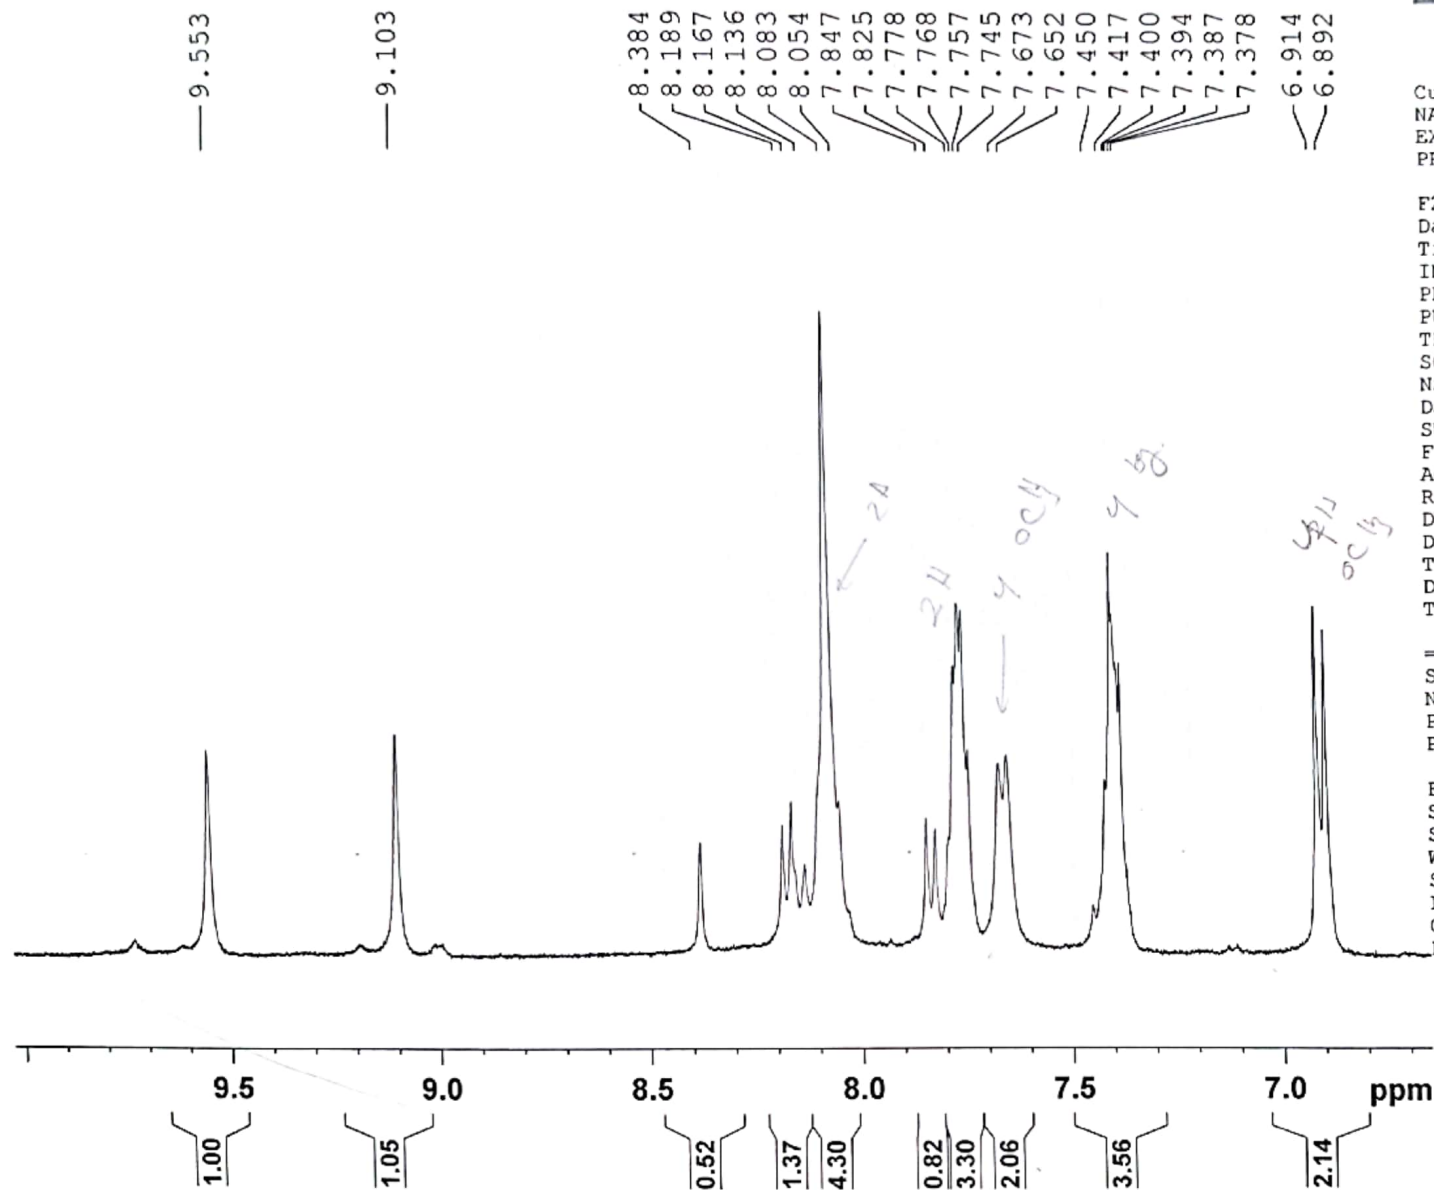

HEBA-M12D  
 DEPTQ-BSU DMSO {C:\data} nmr 19

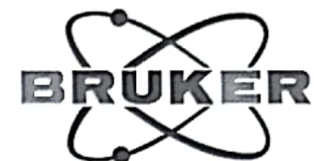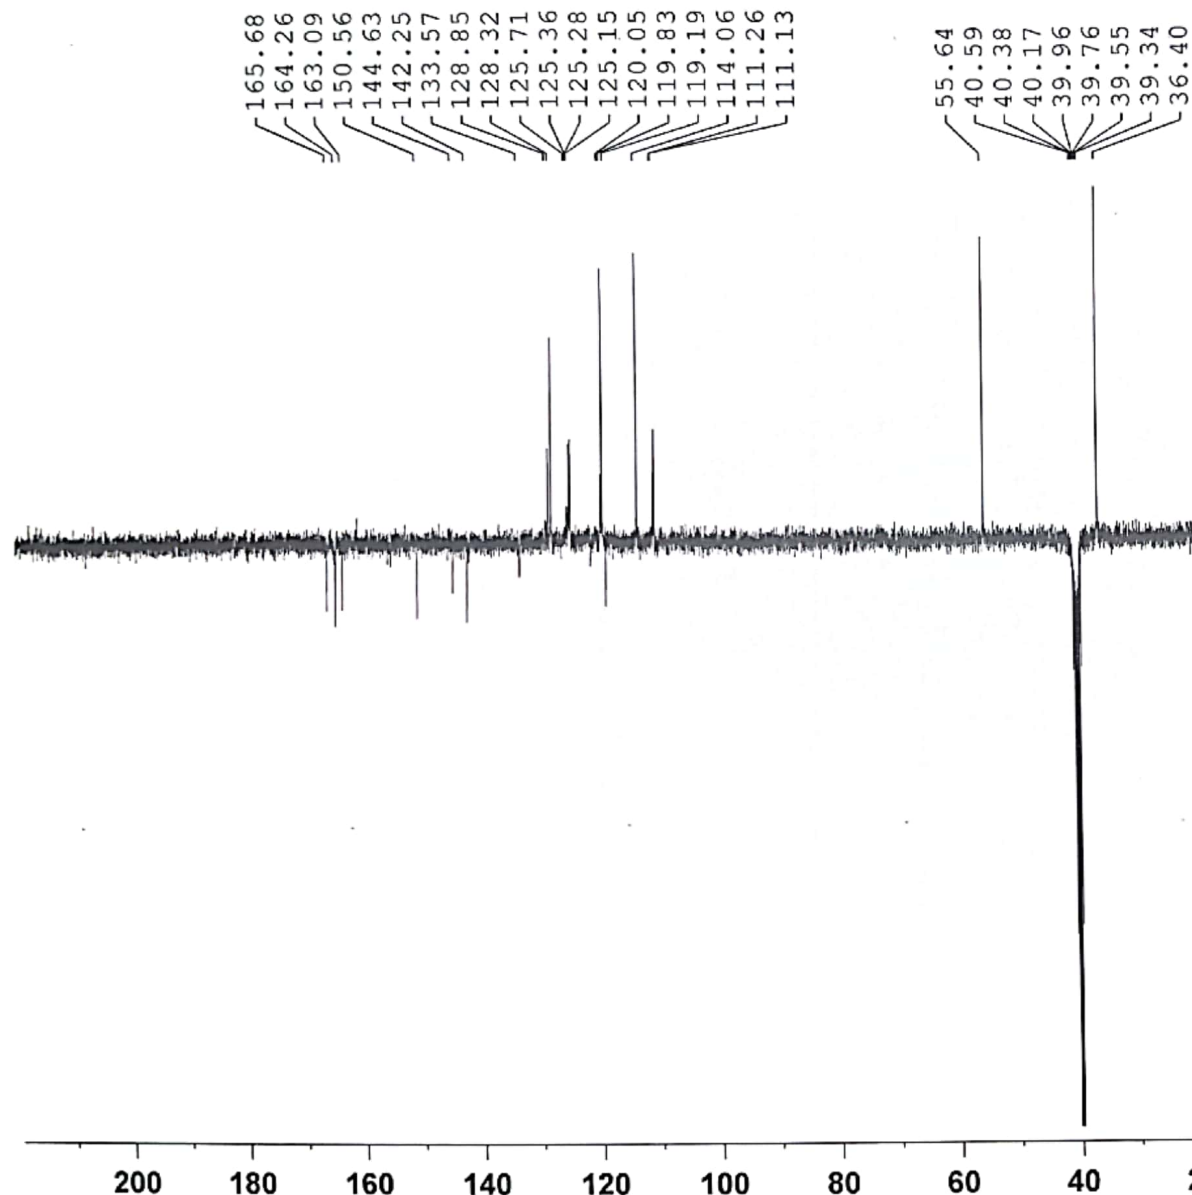

Current Data Parameters  
 NAME Jun17-2015-nmr  
 EXPNO 20  
 PROCNO 1

F2 - Acquisition Parameters  
 Date\_ 20150617  
 Time\_ 20.41  
 INSTRUM spect  
 PROBHD 5 mm PARBO BB/  
 PULPROG deptqgppsp  
 TD 65536  
 SOLVENT DMSO  
 NS 4000  
 DS 4  
 SWH 24038.461 Hz  
 FIDRES 0.366798 Hz  
 AQ 1.3631488 sec  
 RG 205.44  
 DW 20.800 usec  
 DE 6.50 usec  
 TE 296.9 K  
 CNST2 145.0000000  
 CNST12 1.5000000  
 D1 2.0000000 sec  
 D2 0.00344828 sec  
 D12 0.00002000 sec  
 D16 0.00020000 sec  
 TDO 1

===== CHANNEL f1 =====  
 SFO1 100.6228303 MHz  
 NUC1 13C  
 P1 10.00 usec  
 P13 2000.00 usec  
 PLW0 0 W  
 PLW1 66.00000000 W  
 SPNAM[5] Crp60comp.4  
 SPCAL5 0.500  
 SPOFFS5 0 Hz  
 SPW5 10.08399963 W

===== CHANNEL f2 =====  
 SFO2 400.1312797 MHz  
 NUC2 1H  
 CPDPRG[2] waltz16  
 P0 15.75 usec  
 P3 10.50 usec  
 P4 21.00 usec  
 PCPD2 90.00 usec  
 PLW2 16.00000000 W  
 PLW12 0.21777999 W

===== GRADIENT CHANNEL =====  
 GPNAM[1] SMSQ10.100  
 GPNAM[2] SMSQ10.100  
 GPNAM[3] SMSQ10.100  
 GPZ1 31.00 %  
 GPZ2 31.00 %  
 GPZ3 31.00 %  
 P16 1000.00 usec

F2 - Processing parameters  
 SI 32768  
 SF 100.6127690 MHz  
 WDW EM  
 SSB 0  
 LB 1.00 Hz  
 GB 0  
 FC 1.40

HEBA-M12D  
DEPTQ-BSU DMSO {C:\data} nmr 19

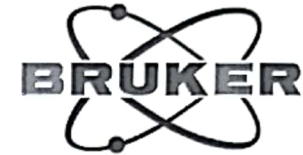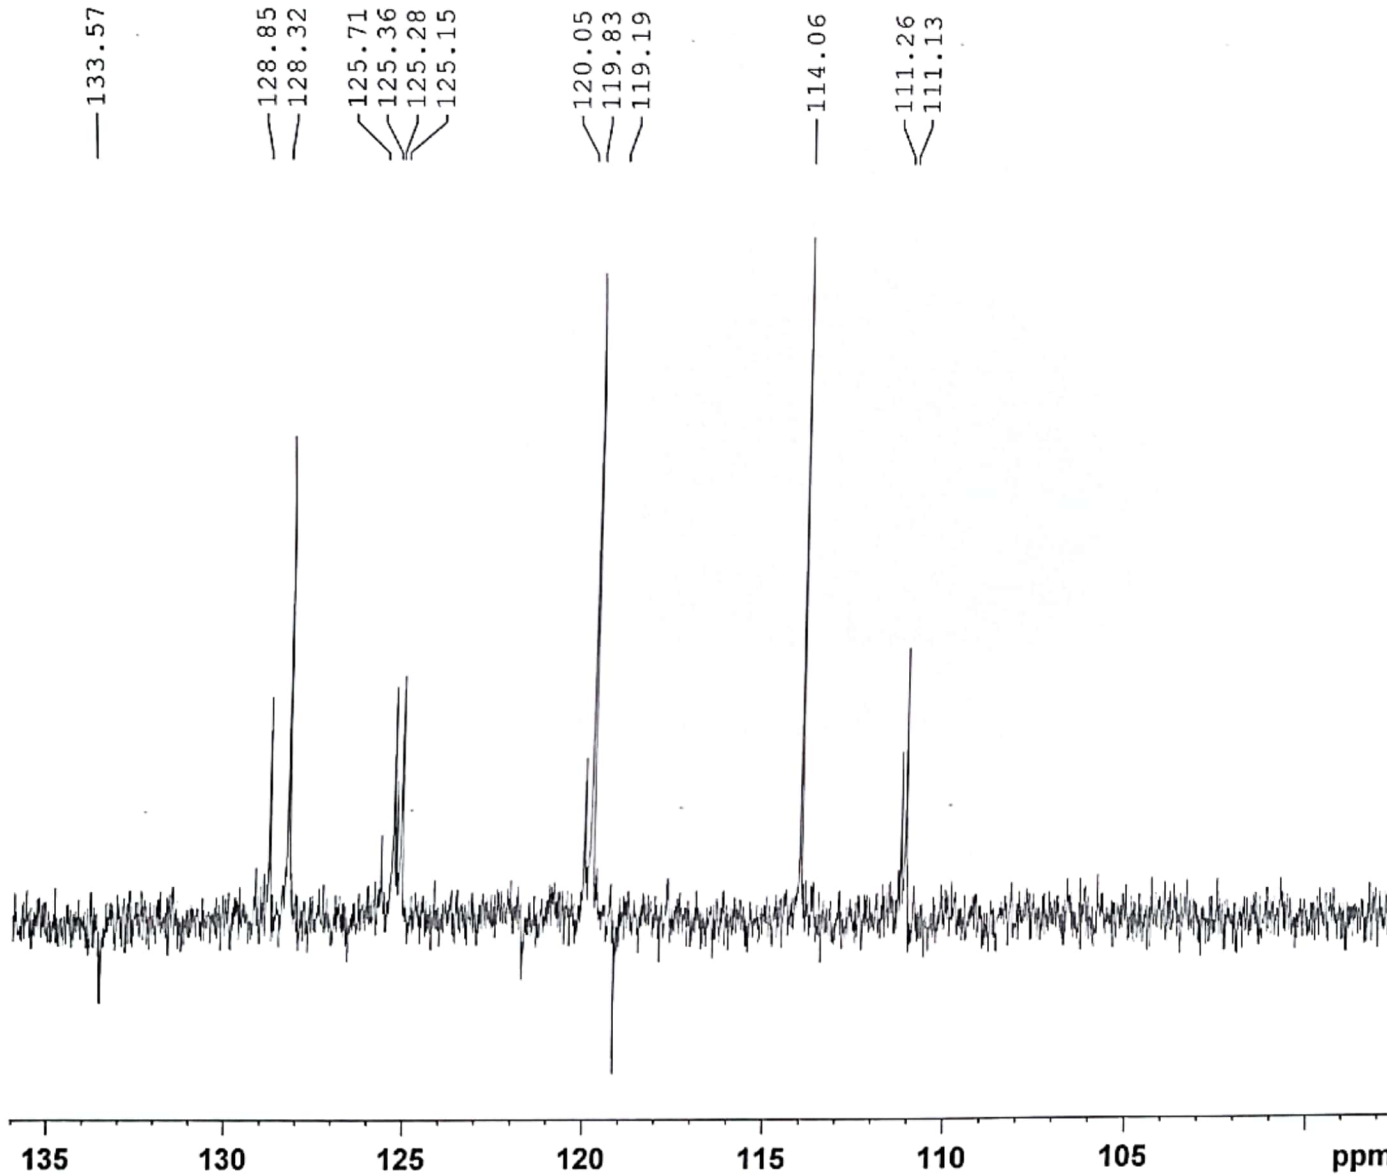

Current Data Parameters  
NAME Jun17-2015-nmr  
EXPNO 20  
PROCNO 1

F2 - Acquisition Parameters  
Date\_ 20150617  
Time 20.41  
INSTRUM spect  
PROBHD 5 mm PABBO BB/  
PULPROG deptgggsp  
TD 65536  
SOLVENT DMSO  
NS 4000  
DS 4  
SWH 24038.461 Hz  
FIDRES 0.366798 Hz  
AQ 1.3631488 sec  
RG 205.44  
DW 20.800 usec  
DE 6.50 usec  
TE 296.9 K  
CNST2 145.0000000  
CNST12 1.5000000  
D1 2.0000000 sec  
D2 0.00344825 sec  
D12 0.00002000 sec  
D16 0.00020000 sec  
TD0 1

==== CHANNEL f1 =====  
SFO1 100.6228303 MHz  
NUC1 13C  
P1 10.00 usec  
P13 2000.00 usec  
PLW0 0 W  
PLW1 66.00000000 W  
SPNAM[5] Crp60comp.4  
SFOAL5 0.500  
SFOFF5 0 Hz  
SPW5 10.08399963 W

==== CHANNEL f2 =====  
SFC2 400.1312797 MHz  
NUC2 1H  
CPDPRG[2] waltz16  
P0 15.75 usec  
P3 10.50 usec  
P4 21.00 usec  
PCPD2 90.00 usec  
PLW2 16.00000000 W  
PLW12 0.21777999 W

==== GRADIENT CHANNEL =====  
GPNAM[1] SMSQ10.100  
GPNAM[2] SMSQ10.100  
GPNAM[3] SMSQ10.100  
GPZ1 31.00 %  
GPZ2 31.00 %  
GPZ3 31.00 %  
P16 1000.00 usec

F2 - Processing parameters  
SI 32768  
SF 100.6127690 MHz  
WDW EM  
SSB 0  
LB 1.00 Hz  
GB 0  
PC 1.40

HEBA-M12D  
DEPTQ-BSU DMSO {C:\data} nmr 19

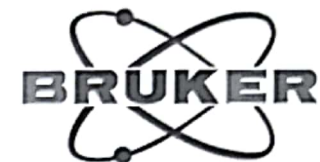

Current Data Parameters  
NAME Jun17-2015-nmr  
EXPNO 20  
PROCNO 1

F2 - Acquisition Parameters  
Date\_ 20150617  
Time 20.41  
INSTRUM spect  
PROBHD 5 mm PABBO BB/  
PULPROG deptqgppsp  
TD 65536  
SOLVENT DMSO  
NS 4000  
DS 4  
SWH 24038.461 Hz  
FIDRES 0.366798 Hz  
AQ 1.3631488 sec  
RG 205.44  
DW 20.800 usec  
DE 6.50 usec  
TE 296.9 K  
CNST2 145.0000000  
CNST12 1.5000000  
D1 2.0000000 sec  
D2 0.00344828 sec  
D12 0.00002000 sec  
D16 0.00020000 sec  
TD0 1

===== CHANNEL f1 =====  
SFO1 100.6228303 MHz  
NUC1 13C  
P1 10.00 usec  
P13 2000.00 usec  
PLW0 0 W  
PLW1 66.00000000 W  
SPNAM[5] Crp60comp.4  
SFOALS 0.500  
SFOFFS5 0 Hz  
SPW5 10.08399963 W

===== CHANNEL f2 =====  
SFO2 400.1312797 MHz  
NUC2 1H  
CPDPRG[2] waltz16  
P0 15.75 usec  
P3 10.50 usec  
P4 21.00 usec  
PCPD2 90.00 usec  
PLW2 16.00000000 W  
PLW12 0.21777999 W

===== GRADIENT CHANNEL =====  
GFNAM[1] SMSQ10.100  
GFNAM[2] SMSQ10.100  
GFNAM[3] SMSQ10.100  
GPZ1 31.00 A  
GPZ2 31.00 A  
GPZ3 31.00 A  
P16 1000.00 usec

F2 - Processing parameters  
S1 32768  
SF 100.6127690 MHz  
WDW EM  
SSB 0  
LB 1.00 Hz  
GB 0  
PC 1.40

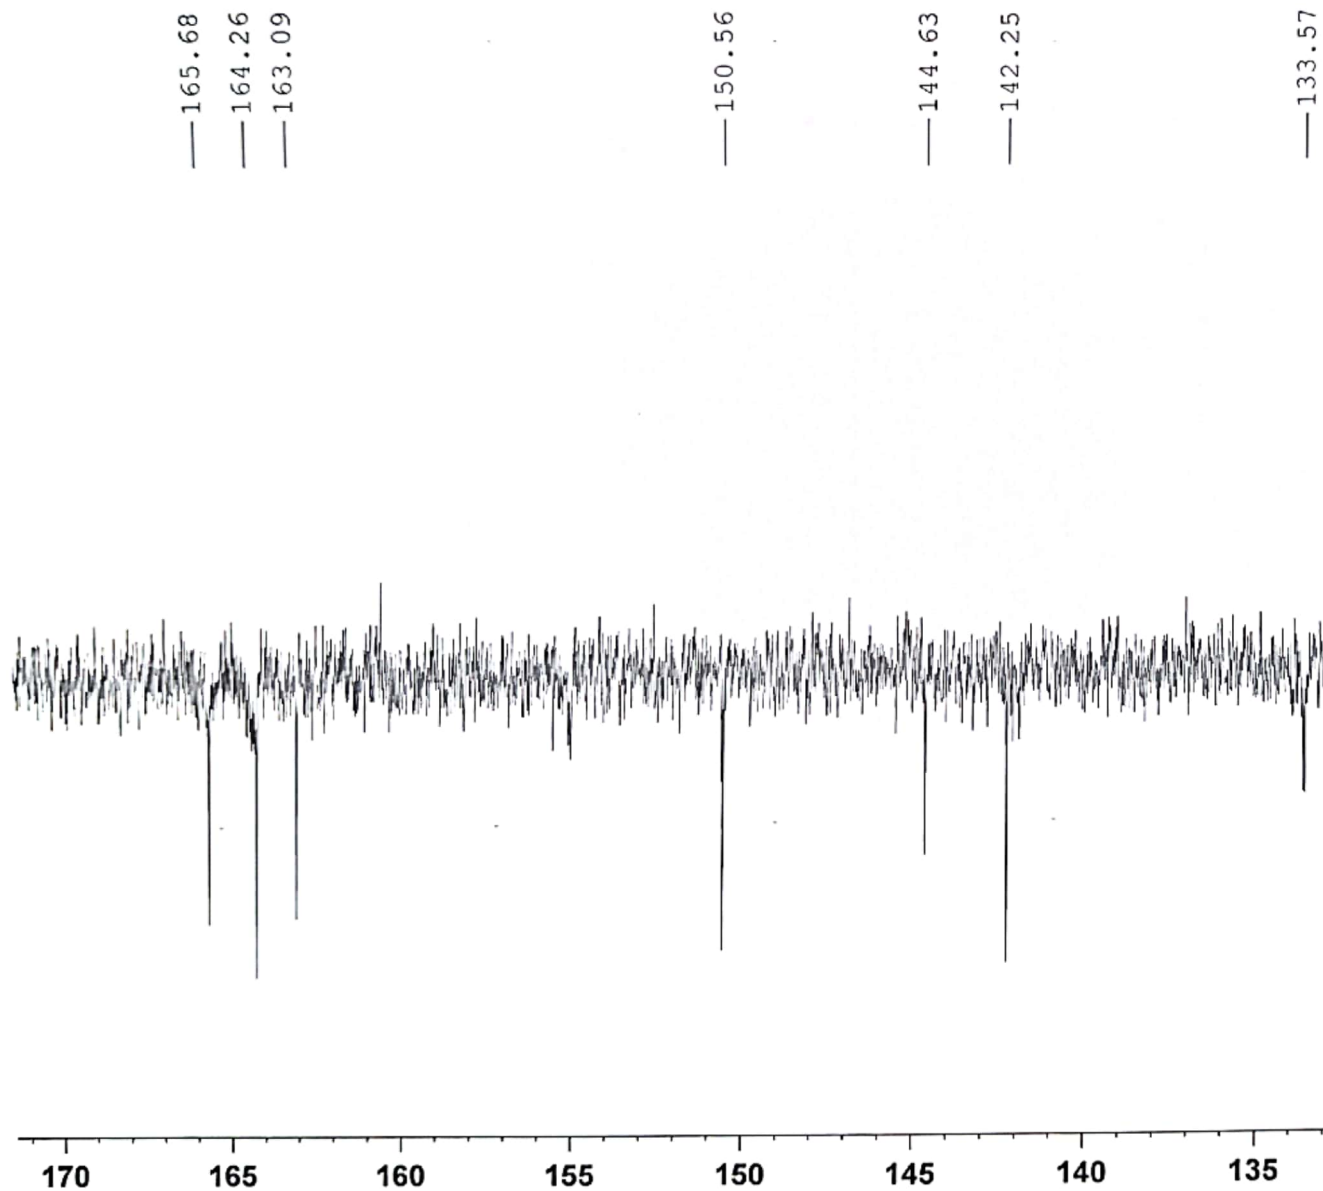

HEBA-12C  
 PROTON\_BSU DMSO (C:\data) nmr 19

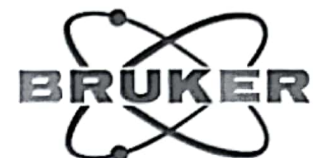

Current Data Parameters  
 NAME Jun16-2015-nmr  
 EXPNO 110  
 PROCNO 1

F2 - Acquisition Parameters  
 Date\_ 20150616  
 Time\_ 10.38  
 INSTRUM spect  
 PROBHD 5 mm PABBO BB/  
 PULPROG zg30  
 TD 65536  
 SOLVENT DMSO  
 NS 16  
 DS 2  
 SWH 8012.820 Hz  
 FIDRES 0.122266 Hz  
 AQ 4.0894465 sec  
 RG 147.93  
 DW 62.400 usec  
 DE 6.50 usec  
 TE 296.8 K  
 D1 1.00000000 sec  
 TD0 1

==== CHANNEL f1 =====  
 SFO1 400.1324710 MHz  
 NUC1 1H  
 P1 10.00 usec  
 PLW1 16.00000000 W

F2 - Processing parameters  
 SI 65536  
 SF 400.1300000 MHz  
 WDW EM  
 SSB 0  
 LB 0.10 Hz  
 GB 0  
 PC 1.00

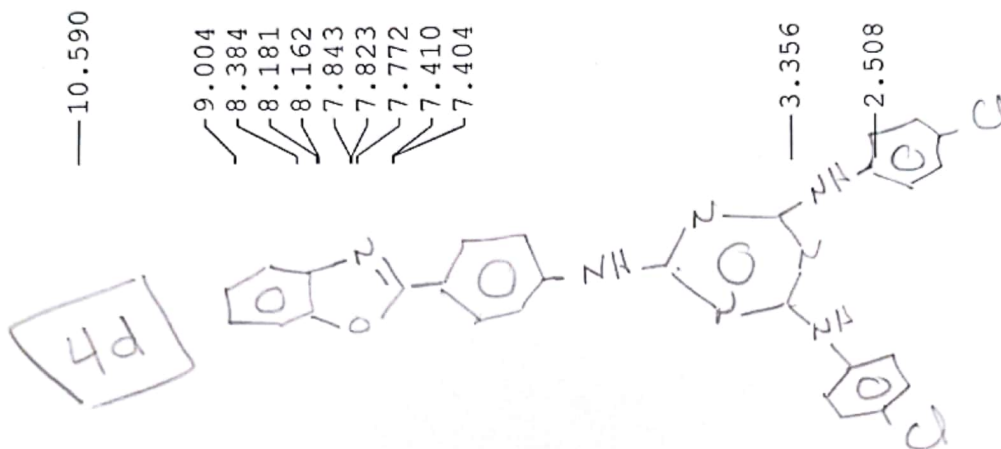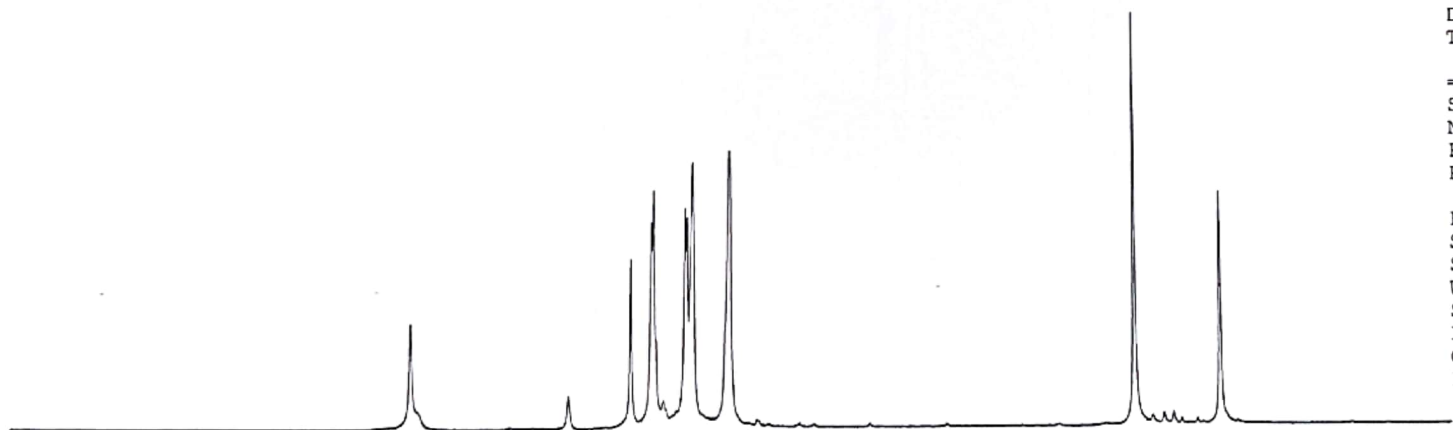

14 13 12 11 10 9 8 7 6 5 4 3 2 ppm

1.00  
 0.22  
 0.90  
 2.58  
 4.00  
 2.88  
 2.01  
 1.31

HEBA-12C  
 PROTON\_BSU DMSO (C:\data) nmr 19

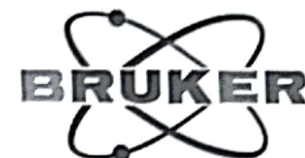

Current Data Parameters  
 NAME Jun16-2015-nmr  
 EXPNO 110  
 PROCNO 1

F2 - Acquisition Parameters  
 Date\_ 20150616  
 Time\_ 10.38  
 INSTRUM spect  
 PROBHD 5 mm PABBO BB/  
 PULPROG zg30  
 TD 65536  
 SOLVENT DMSO  
 NS 16  
 DS 2  
 SWH 8012.820 Hz  
 FIDRES 0.122266 Hz  
 AQ 4.0894465 sec  
 RG 147.93  
 DW 62.400 usec  
 DE 6.50 usec  
 TE 296.8 K  
 D1 1.00000000 sec  
 TD0 1

===== CHANNEL f1 =====  
 SFO1 400.1324710 MHz  
 NUC1 1H  
 P1 10.00 usec  
 PLW1 16.00000000 W

F2 - Processing parameters  
 SI 65536  
 SF 400.1300000 MHz  
 WDW EM  
 SSB 0  
 LB 0.10 Hz  
 GB 0  
 PC 1.00

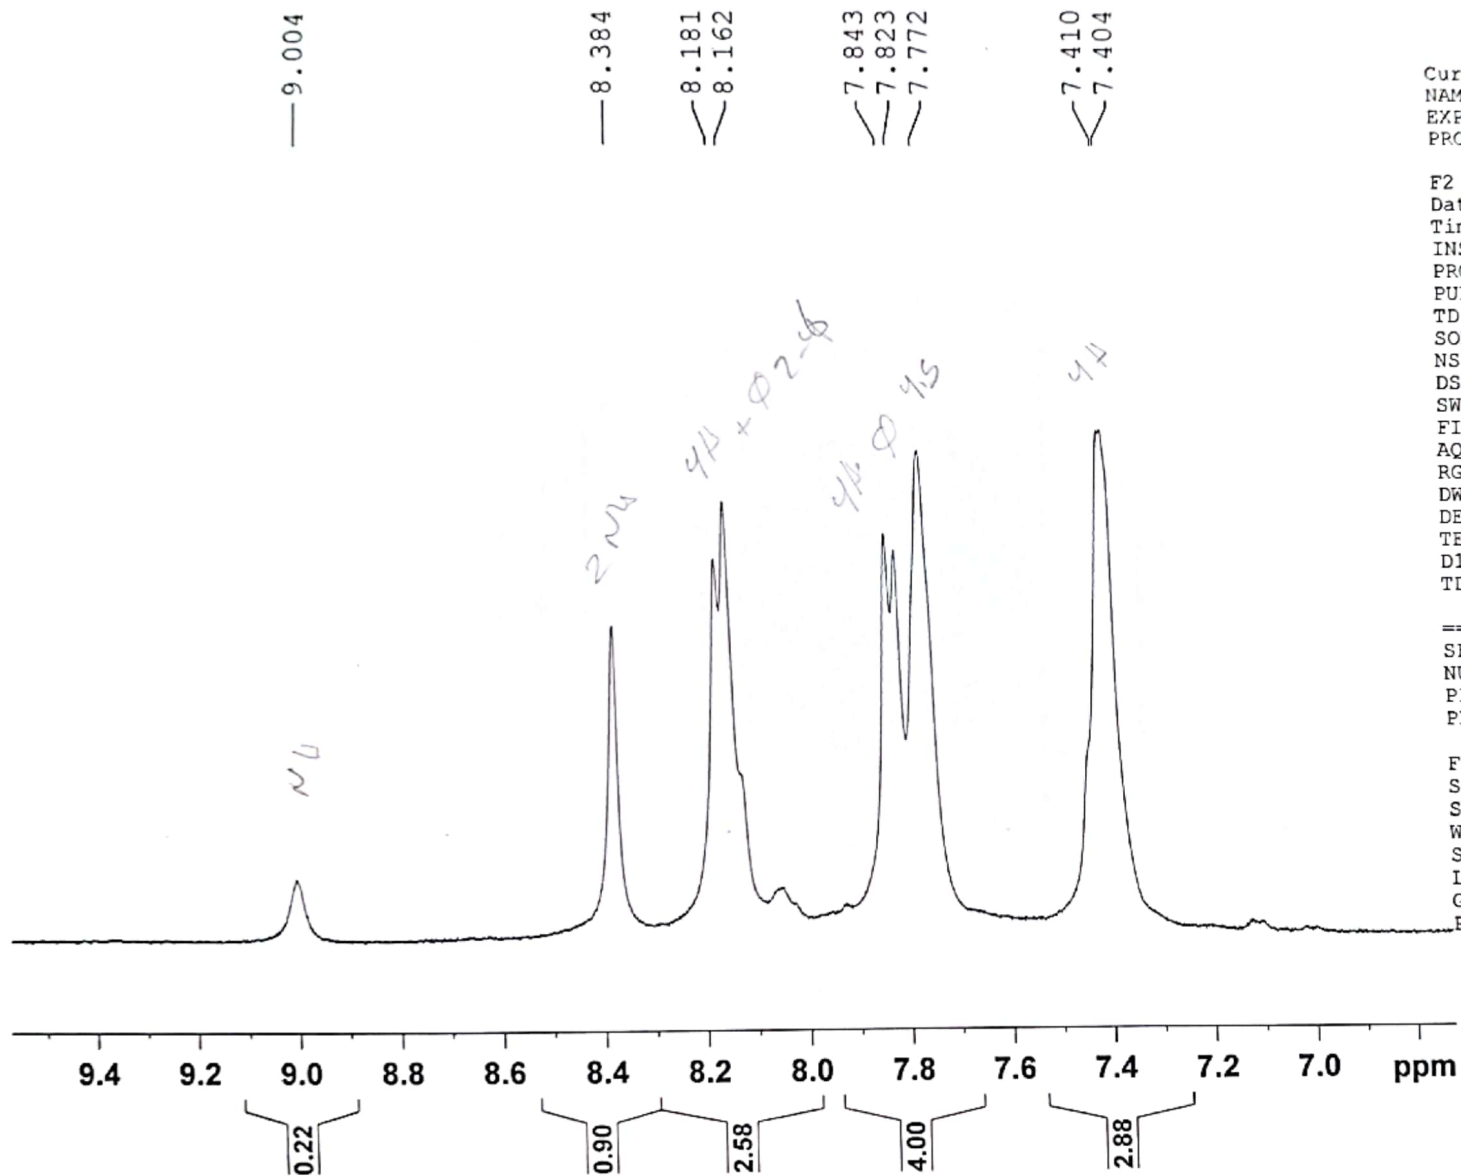

HEBA-12C  
PROTON\_BSU DMSO (C:\data) nmr 19

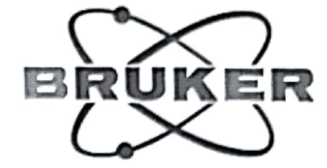

Current Data Parameters  
NAME Jun16-2015-nmr  
EXPNO 110  
PROCNO 1

F2 - Acquisition Parameters  
Date\_ 20150616  
Time 10.38  
INSTRUM spect  
PROBHD 5 mm PABBO BB/  
PULPROG zg30  
TD 65536  
SOLVENT DMSO  
NS 16  
DS 2  
SWH 8012.820 Hz  
FIDRES 0.122266 Hz  
AQ 4.0894465 sec  
RG 147.93  
DW 62.400 usec  
DE 6.50 usec  
TE 296.8 K  
D1 1.00000000 sec  
TDO 1

==== CHANNEL f1 =====  
SFO1 400.1324710 MHz  
NUC1 1H  
P1 10.00 usec  
PLW1 16.00000000 W

F2 - Processing parameters  
SI 65536  
SF 400.1300000 MHz  
WDW EM  
SSB 0  
LB 0.10 Hz  
GB 0  
PC 1.00

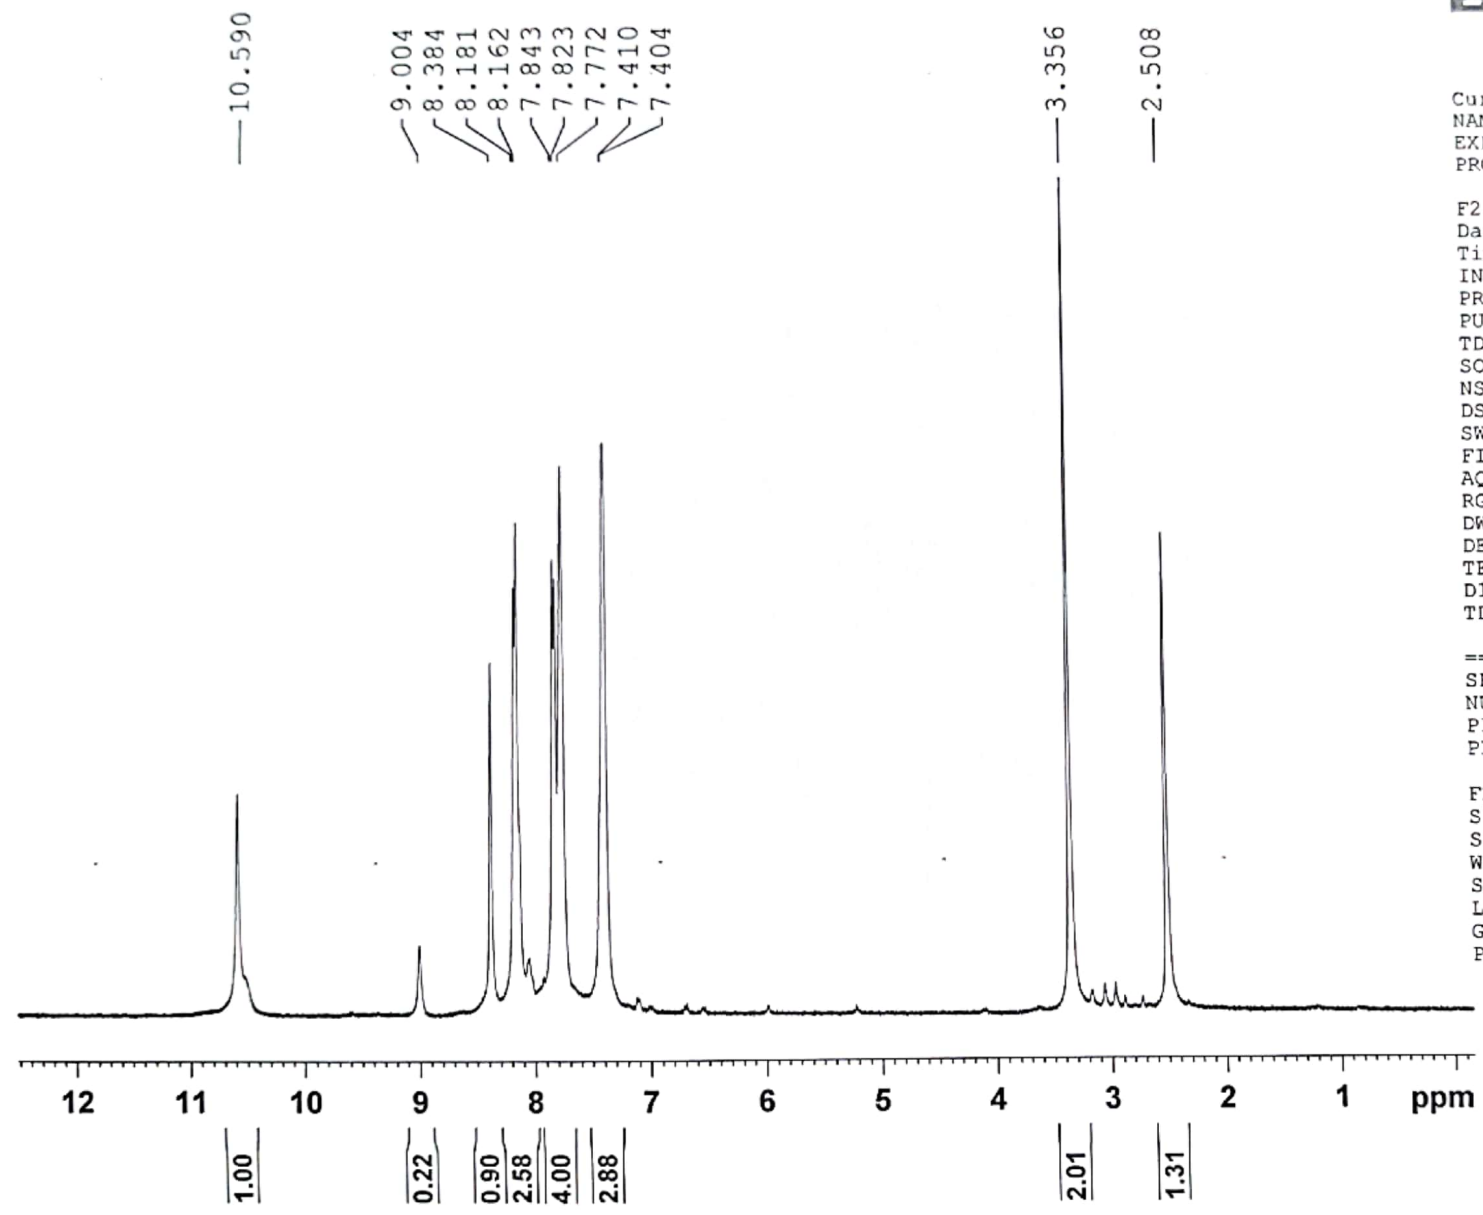



HEBA-12C  
PROTON\_BSU DMSO {C:\data} nmr 19

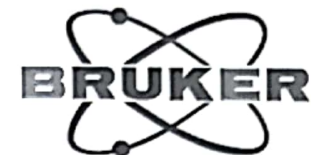

Current Data Parameters  
NAME Jun16-2015-nmr  
EXPNO 110  
PROCNO 1

F2 - Acquisition Parameters  
Date\_ 20150616  
Time 10.38  
INSTRUM spect  
PROBHD 5 mm PABBO BB/  
PULPROG zg30  
TD 65536  
SOLVENT DMSO  
NS 16  
DS 2  
SWH 8012.820 Hz  
FIDRES 0.122266 Hz  
AQ 4.0894465 sec  
RG 147.93  
DW 62.400 usec  
DE 6.50 usec  
TE 296.8 K  
D1 1.00000000 sec  
TD0 1

==== CHANNEL f1 =====  
SFO1 400.1324710 MHz  
NUC1 1H  
P1 10.00 usec  
PLW1 16.00000000 W

F2 - Processing parameters  
SI 65536  
SF 400.1300000 MHz  
WDW EM  
SSB 0  
LB 0.10 Hz  
GB 0  
PC 1.00

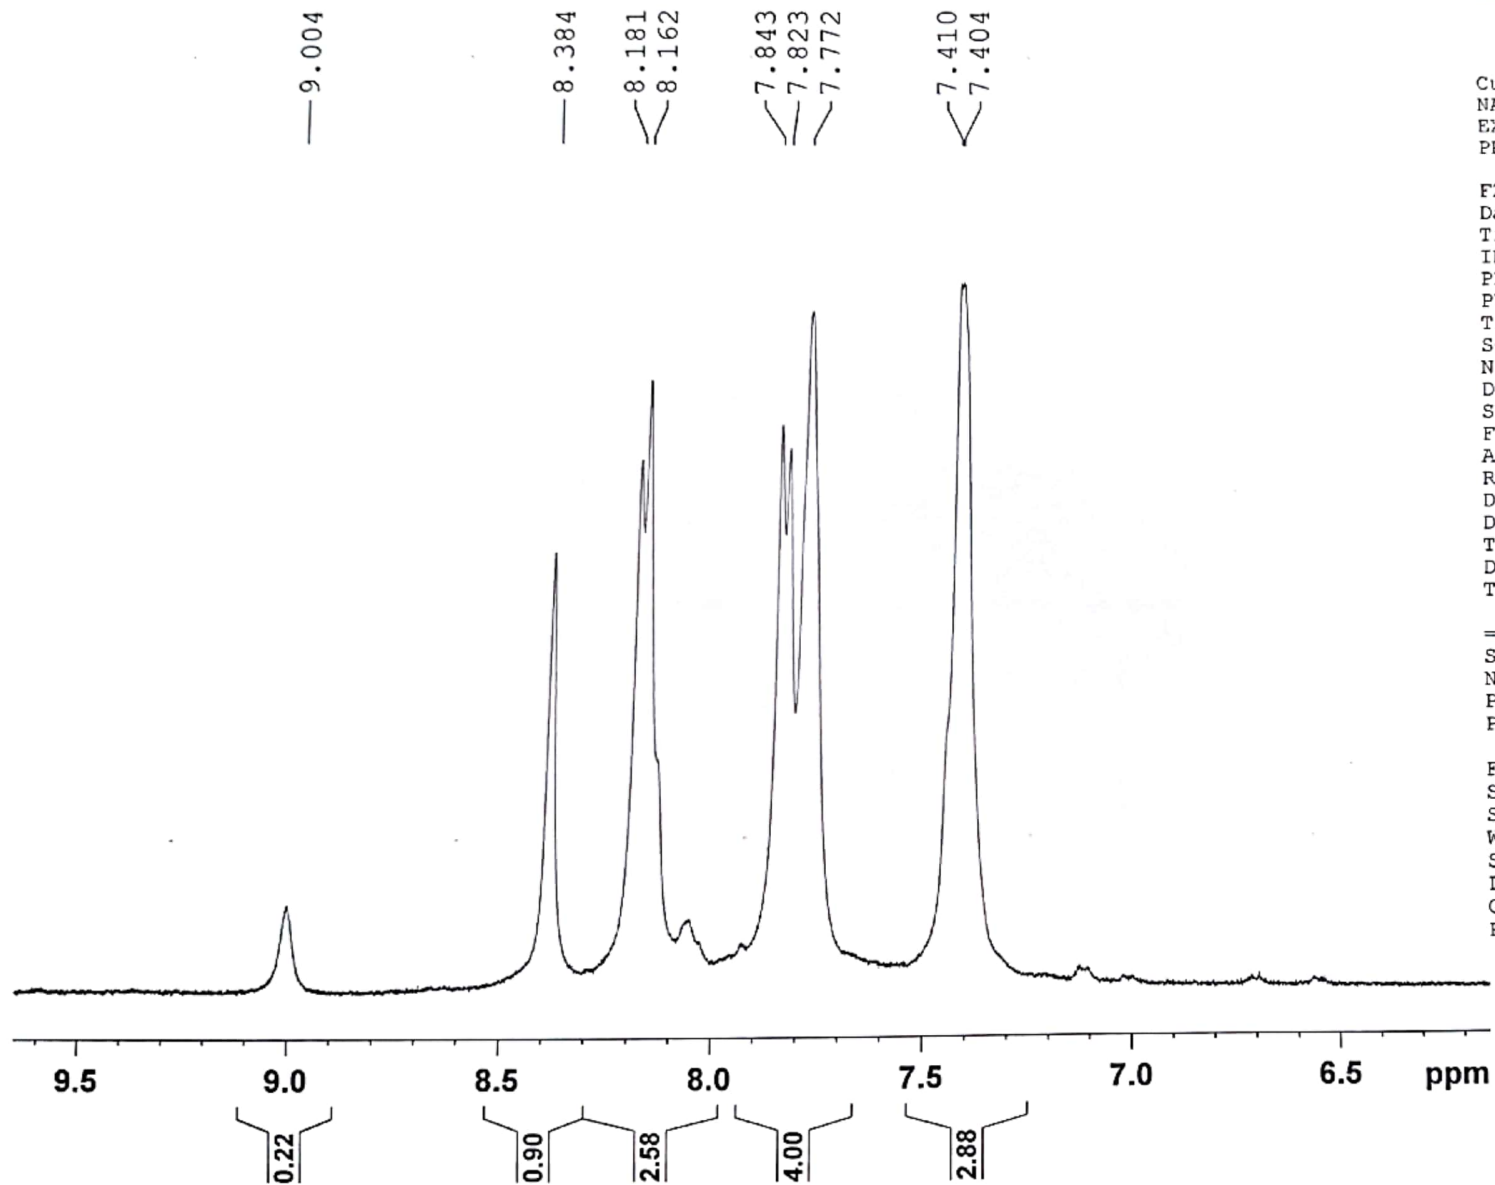

HEBA-12C  
DEPTQ-BSU DMSO {C:\data} nmr 20

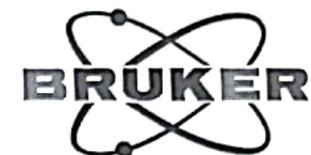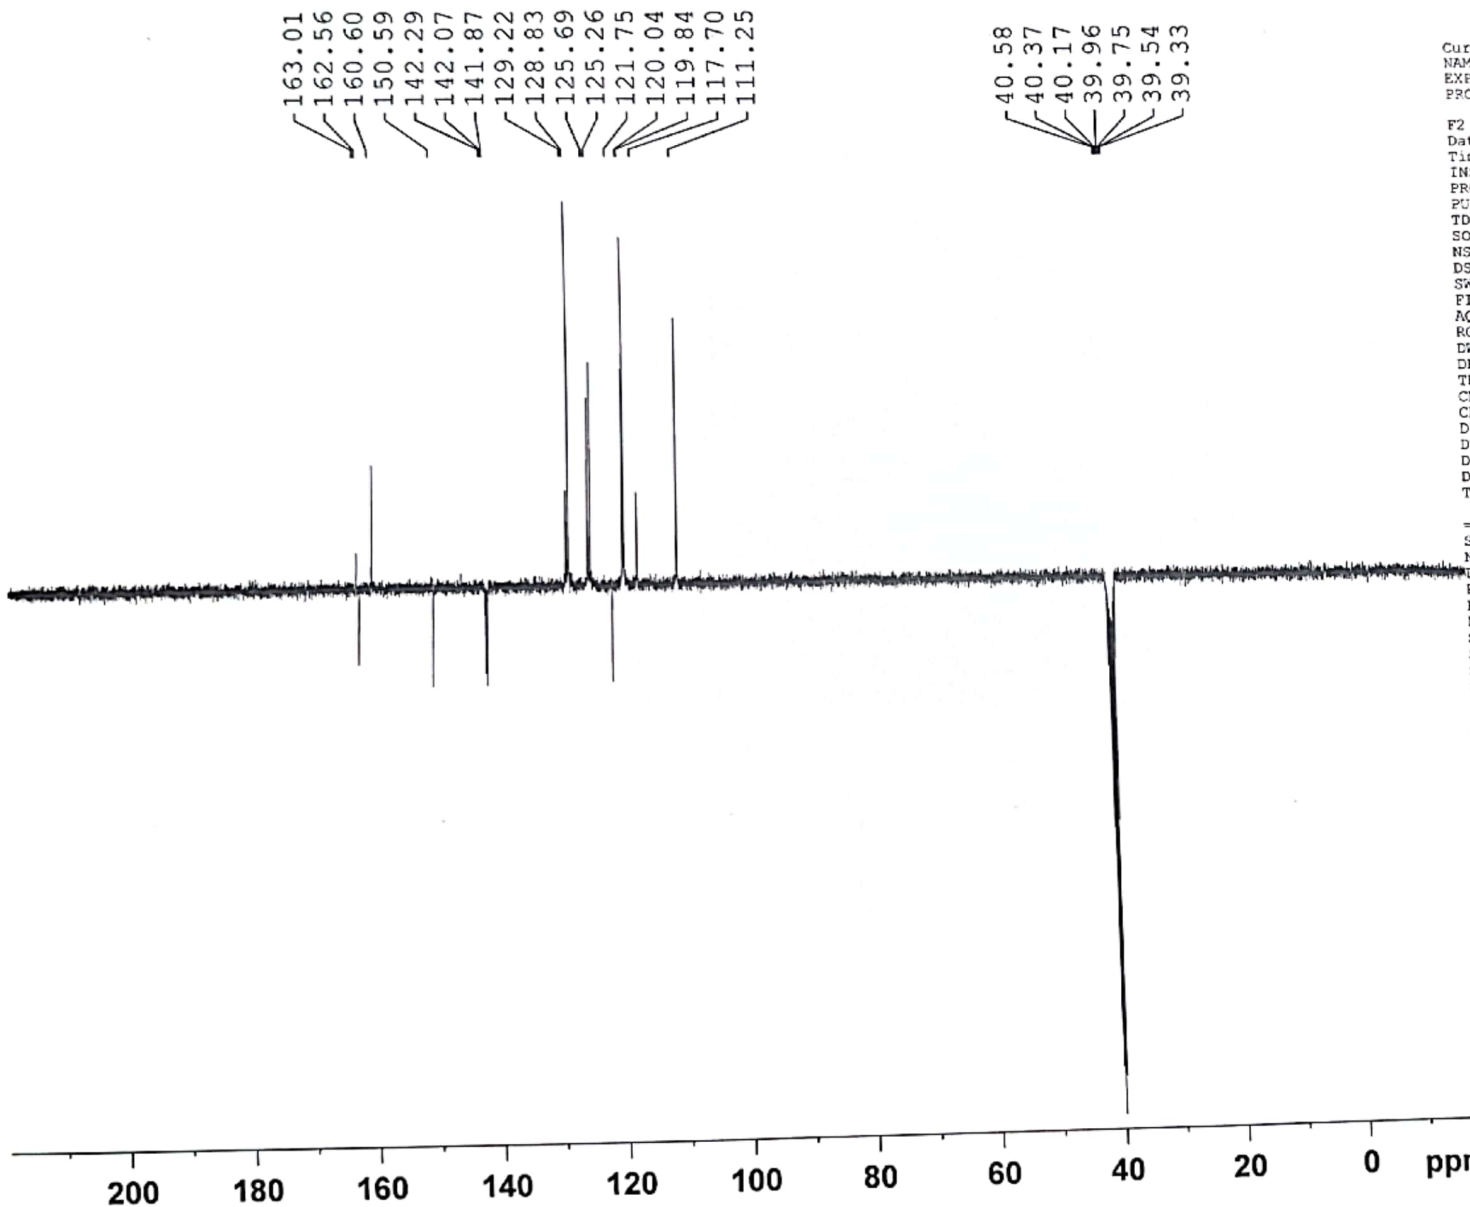

163.01  
162.56  
160.60  
150.59  
142.29  
142.07  
141.87  
129.22  
128.83  
125.69  
125.26  
121.75  
120.04  
119.84  
117.70  
111.25

40.58  
40.37  
40.17  
39.96  
39.75  
39.54  
39.33

Current Data Parameters  
NAME Jun17-2015-nmr  
EXPNO 30  
PROCNO 1

F2 - Acquisition Parameters  
Date\_ 20150618  
Time\_ 0.32  
INSTRUM spect  
PROBHD 5 mm PABBO BB/  
PULPROG deptqppsp  
TD 65536  
SOLVENT DMSO  
NS 4000  
DS 4  
SWH 24038.461 Hz  
FIDRES 0.366798 Hz  
AQ 1.3631488 sec  
RG 205.44  
DW 20.800 usec  
DE 6.50 usec  
TE 296.2 K  
CNST2 145.000000  
CNST12 1.500000  
D1 2.0000000 sec  
D2 0.00344828 sec  
D12 0.00002000 sec  
D16 0.00020000 sec  
TD0 1

===== CHANNEL f1 =====  
SFO1 100.6228303 MHz  
NUC1 13C  
P1 10.00 usec  
P13 2000.00 usec  
PLW0 0 W  
PLW1 66.00000000 W  
SPNAM[5] Crp60comp.4  
SFOALS 0.500  
SFOFFS5 0 Hz  
SPW5 10.08399963 W

===== CHANNEL f2 =====  
SFO2 400.1312797 MHz  
NUC2 1H  
CFDPRG[2] waltz16  
P0 15.75 usec  
P3 10.50 usec  
P4 21.00 usec  
PCPD2 90.00 usec  
PLW2 16.00000000 W  
PLW12 0.21777999 W

===== GRADIENT CHANNEL =====  
GPNAM[1] SMSQ10.100  
GPNAM[2] SMSQ10.100  
GPNAM[3] SMSQ10.100  
GPZ1 31.00 %  
GPZ2 31.00 %  
GPZ3 31.00 %  
P16 1000.00 usec

F2 - Processing parameters  
SI 32768  
SF 100.6127690 MHz  
WDW EM  
SSB 0  
LB 1.00 Hz  
GB 0  
PC 1.40

HEBA-12C  
DEPTQ-BSU DMSO (C:\data) nmr 20

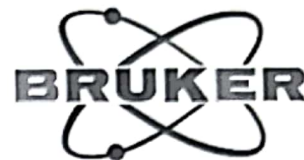

Current Data Parameters  
NAME Jun17-2015-nmr  
EXFNO 30  
PROCNO 1

F2 - Acquisition Parameters  
Date\_ 20150618  
Time 0.32  
INSTRUM spect  
PROBHD 5 mm PABBO BB/  
PULPROG deptqqqpp  
TD 65536  
SOLVENT DMSO  
NS 4000  
DS 4  
SWH 24039.461 Hz  
FIDRES 0.366798 Hz  
AQ 1.3631488 sec  
RG 205.44  
DW 20.800 usec  
DE 6.50 usec  
TE 296.2 K  
CNST2 145.0000000  
CNST12 1.5000000  
D1 2.00000000 sec  
D2 0.00344828 sec  
D12 0.00002000 sec  
D16 0.00020000 sec  
TDO 1

===== CHANNEL f1 =====  
SFO1 100.6228303 MHz  
NUC1 13C  
P1 10.00 usec  
P13 2000.00 usec  
PLW0 0 W  
PLW1 66.00000000 W  
SPNAM[5] Crp60comp.4  
SFOAL5 0.500  
SPOFFS5 0 Hz  
SPW5 10.08399963 W

===== CHANNEL f2 =====  
SFO2 400.1312797 MHz  
NUC2 1H  
CPDPRG[2] waltz16  
P0 15.75 usec  
P3 10.50 usec  
P4 21.00 usec  
PCPD2 90.00 usec  
PLW2 16.00000000 W  
PLW12 0.21777999 W

===== GRADIENT CHANNEL =====  
GPNAM[1] SMSQ10.100  
GPNAM[2] SMSQ10.100  
GPNAM[3] SMSQ10.100  
GPZ1 31.00 %  
GPZ2 31.00 %  
GPZ3 31.00 %  
F16 1000.00 usec

F2 - Processing parameters  
SI 32768  
SF 100.6127690 MHz  
WDW EM  
SSB 0  
LB 1.00 Hz  
GB 0  
PC 1.40

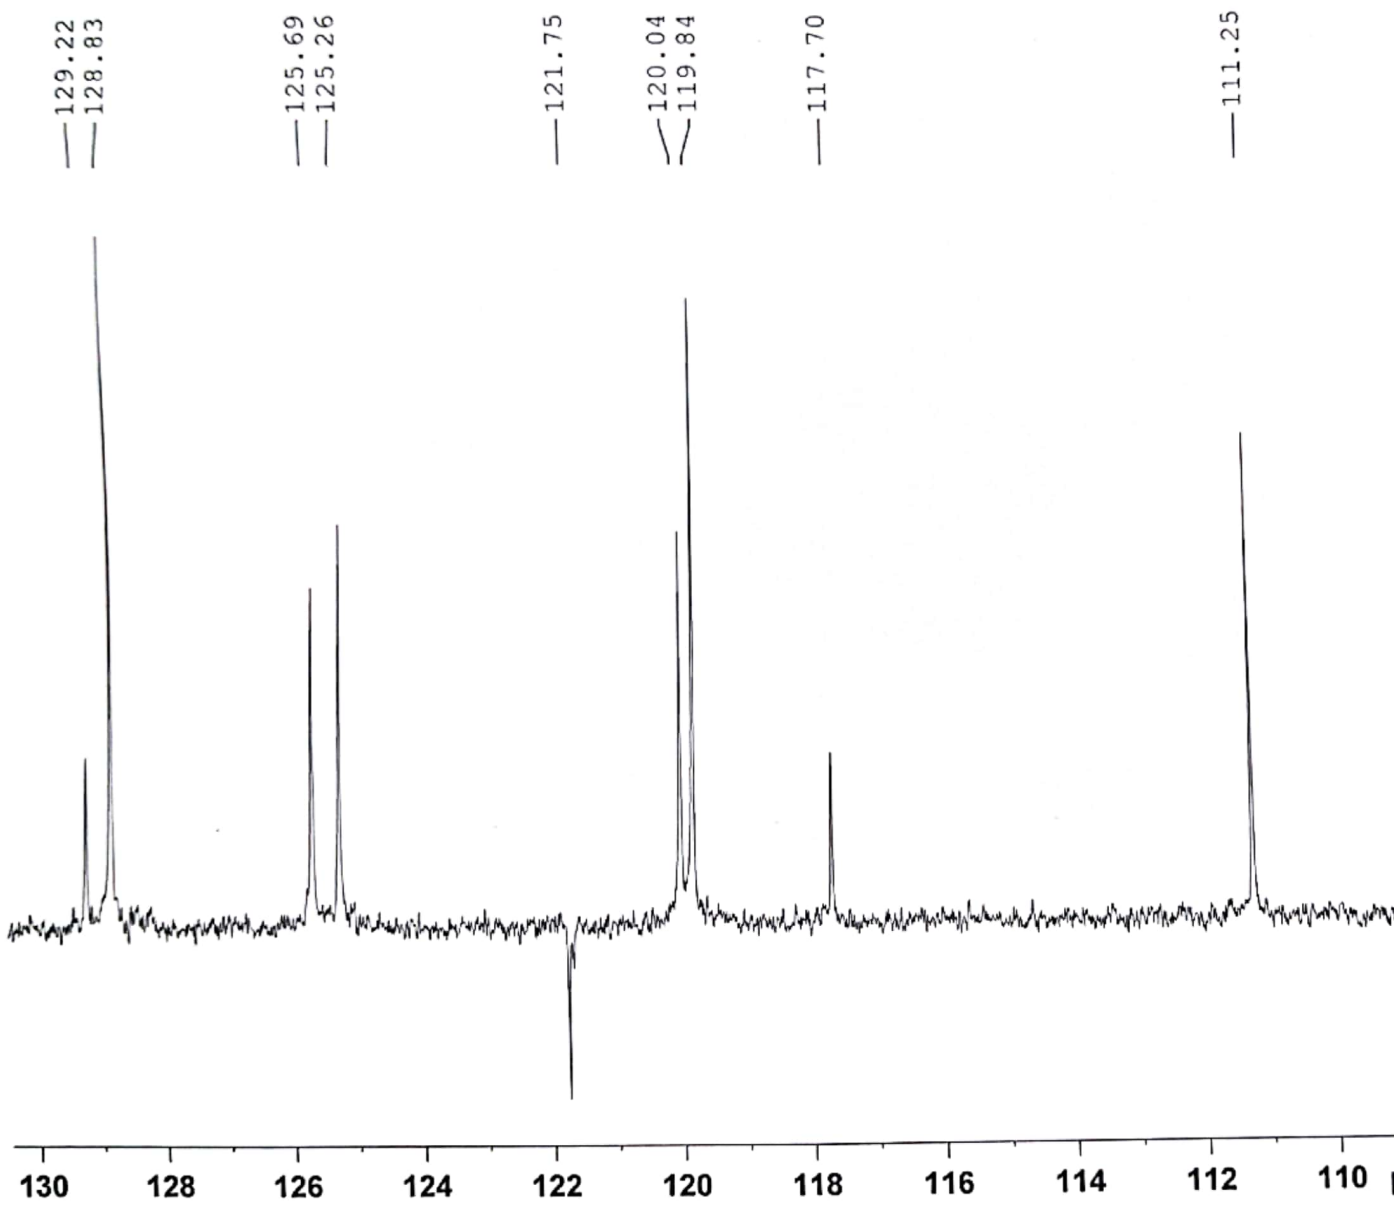

HEBA-12C  
DEPTQ-BSU DMSO {C:\data} nmr 20

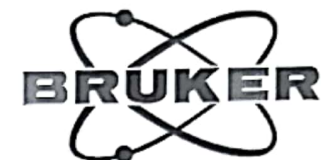

Current Data Parameters  
NAME Jun17-2015-nmr  
EXPNO 30  
PROCNO 1

F2 - Acquisition Parameters  
Date\_ 20150618  
Time\_ 0.32  
INSTRUM spect  
PROBHD 5 mm PABBO BB/  
PULPROG deptqqpsp  
TD 65536  
SOLVENT DMSO  
NS 4000  
DS 4  
SWH 24038.461 Hz  
FIDRES 0.366798 Hz  
AQ 1.3631488 sec  
RG 205.44  
DW 20.800 usec  
DE 6.50 usec  
TE 296.2 K  
CNST2 145.0000000  
CNST12 1.5000000  
D1 2.00000000 sec  
D2 0.00344828 sec  
D12 0.00002000 sec  
D16 0.00020000 sec  
TDO 1

===== CHANNEL f1 =====  
SFO1 100.6228303 MHz  
NUC1 13C  
P1 10.00 usec  
P13 2000.00 usec  
PLW0 0 W  
PLW1 66.00000000 W  
SPNAM[5] Crp60comp.4  
SPOALS 0.500  
SPOFFS5 0 Hz  
SPW5 10.08399963 W

===== CHANNEL f2 =====  
SFO2 400.1312797 MHz  
NUC2 1H  
CPDPRG[2] waltz16  
P0 15.75 usec  
P3 10.50 usec  
P4 21.00 usec  
PCPD2 90.00 usec  
PLW2 16.00000000 W  
PLW12 0.21777999 W

===== GRADIENT CHANNEL =====  
GPNAM[1] SMSQ10.100  
GPNAM[2] SMSQ10.100  
GPNAM[3] SMSQ10.100  
GPZ1 31.00 %  
GPZ2 31.00 %  
GPZ3 31.00 %  
P16 1000.00 usec

F2 - Processing parameters  
SI 32768  
SF 100.6127690 MHz  
WDW EM  
SSB 0  
LB 1.00 Hz  
GB 0  
PC 1.40

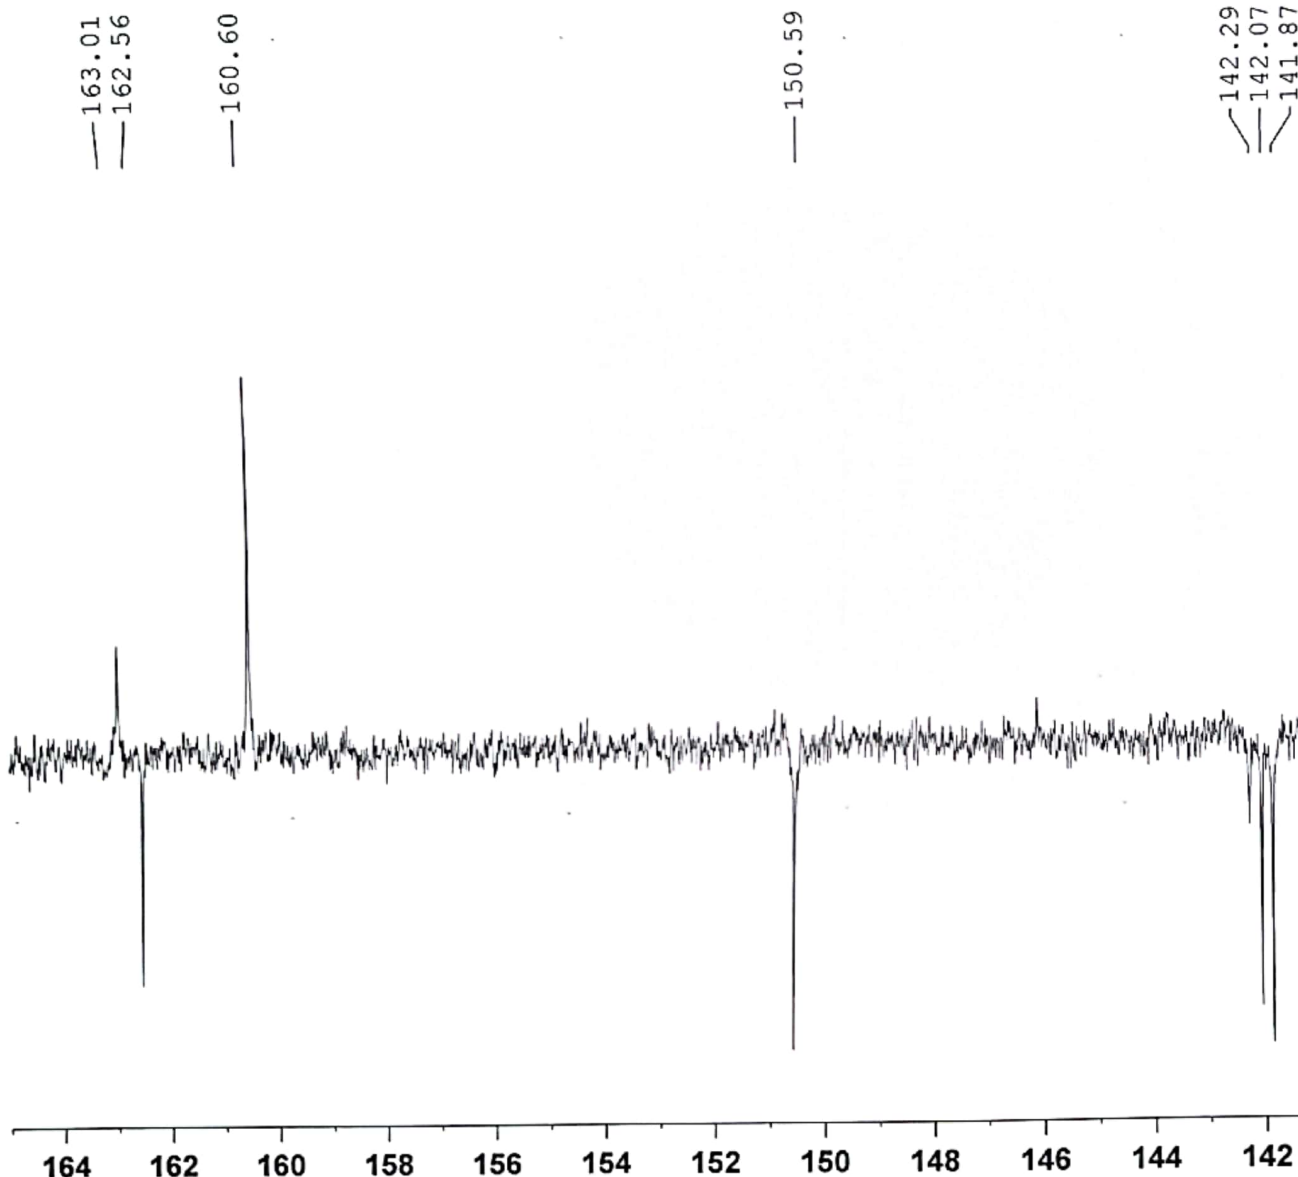

HEBA-M-CLCL  
 PROTON\_BSU CDC13 {C:\data} nmr 9

M13a

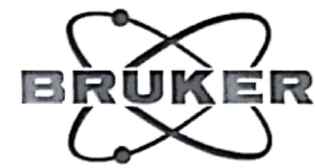

8.429  
8.389  
8.299  
8.278  
7.835  
7.793  
7.773  
7.617  
7.603  
7.595  
7.392  
7.384  
7.378  
7.369  
7.284

2+  
clac.d

1.684  
1.623  
1.548  
1.273

5a

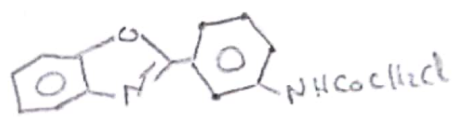

Current Data Parameters  
 NAME Mar15-2015-nmr  
 EXPNO 200  
 PROCNO 1

F2 - Acquisition Parameters  
 Date\_ 20150315  
 Time\_ 12.45  
 INSTRUM spect  
 PROBHD 5 mm PABBO BB/  
 PULPROG zg30  
 TD 65536  
 SOLVENT CDC13  
 NS 16  
 DS 2  
 SWH 8012.820 Hz  
 FIDRES 0.122266 Hz  
 AQ 4.0894465 sec  
 RG 147.93  
 DW 62.400 usec  
 DE 6.50 usec  
 TE 293.7 K  
 D1 1.00000000 sec  
 TDO 1

===== CHANNEL f1 =====  
 SFO1 400.1324710 MHz  
 NUC1 1H  
 P1 10.00 usec  
 PLW1 16.00000000 W

F2 - Processing parameters  
 SI 65536  
 SF 400.1300000 MHz  
 WDW EM  
 SSB 0  
 LB 0.10 Hz  
 GB 0  
 PC 1.00

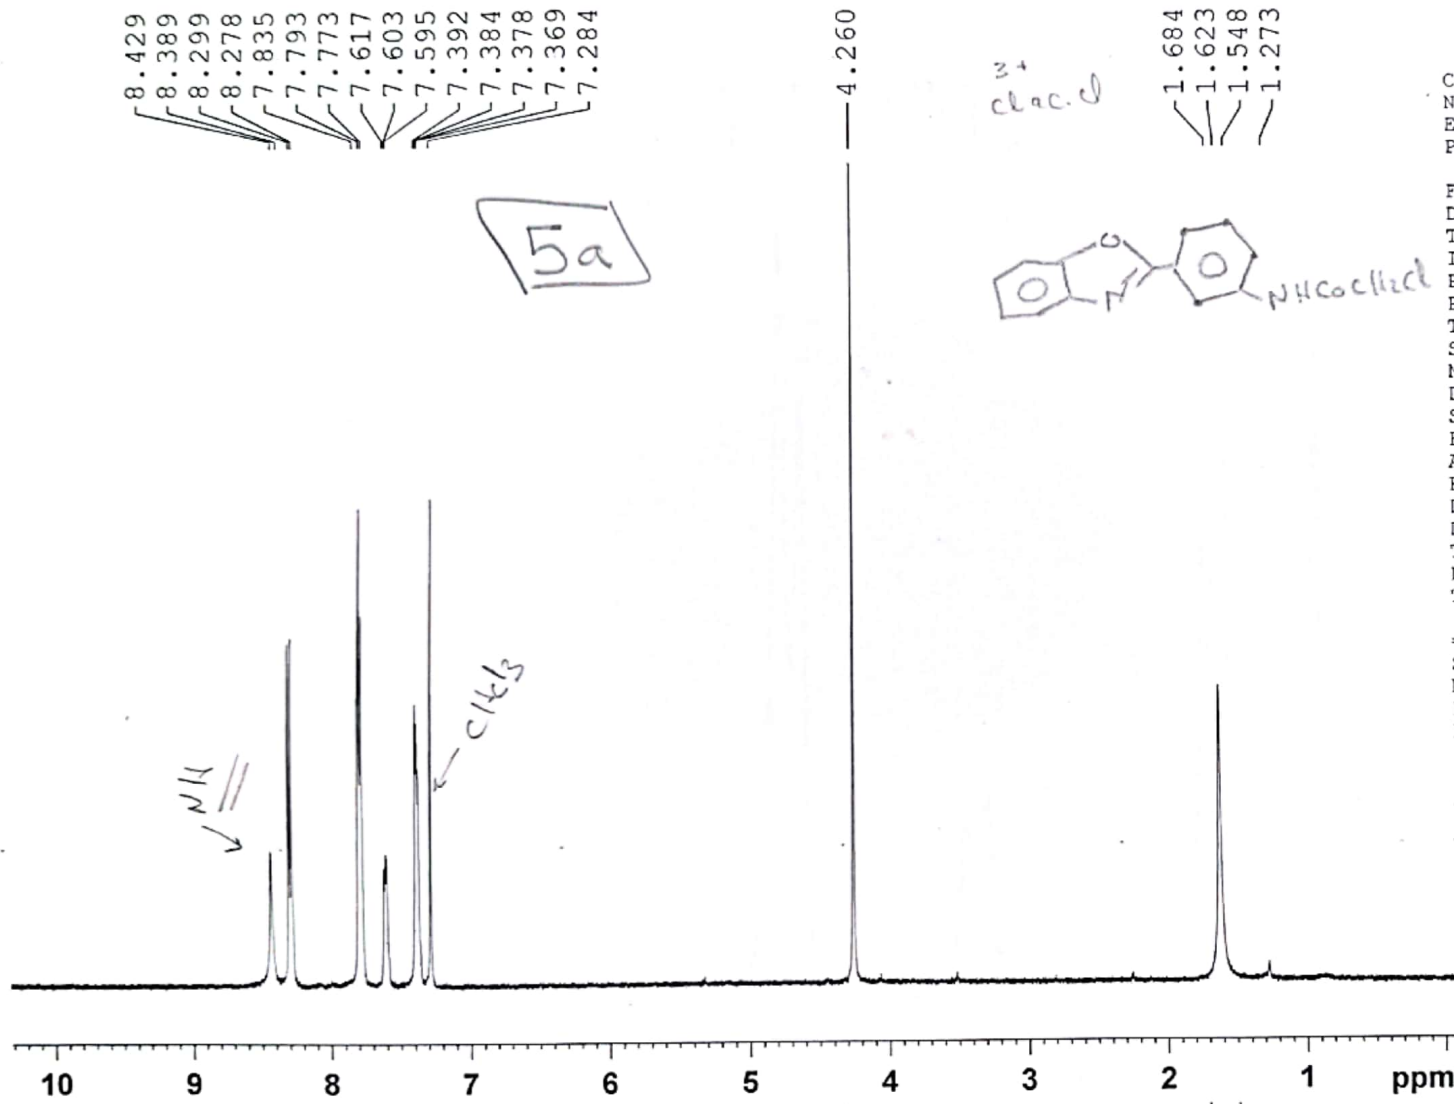

1.00  
2.14  
3.22  
1.10  
2.16  
1.11

1 2 3 1 2

HEBA-M-CLCL  
 PROTON\_BSU CDC13 {C:\data} nmr 9

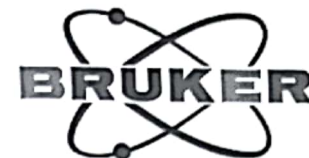

Current Data Parameters  
 NAME Mar15-2015-nmr  
 EXPNO 200  
 PROCNO 1

F2 - Acquisition Parameters  
 Date\_ 20150315  
 Time\_ 12.45  
 INSTRUM spect  
 PROBHD 5 mm PABBO BB/  
 PULPROG zg30  
 TD 65536  
 SOLVENT CDC13  
 NS 16  
 DS 2  
 SWH 8012.820 Hz  
 FIDRES 0.122266 Hz  
 AQ 4.0894465 sec  
 RG 147.93  
 DW 62.400 usec  
 DE 6.50 usec  
 TE 293.7 K  
 D1 1.00000000 sec  
 TD0 1

===== CHANNEL f1 =====  
 SFO1 400.1324710 MHz  
 NUC1 1H  
 P1 10.00 usec  
 PLW1 16.00000000 W

F2 - Processing parameters  
 SI 65536  
 SF 400.1300000 MHz  
 WDW EM  
 SSB 0  
 LB 0.10 Hz  
 GB 0  
 PC 1.00

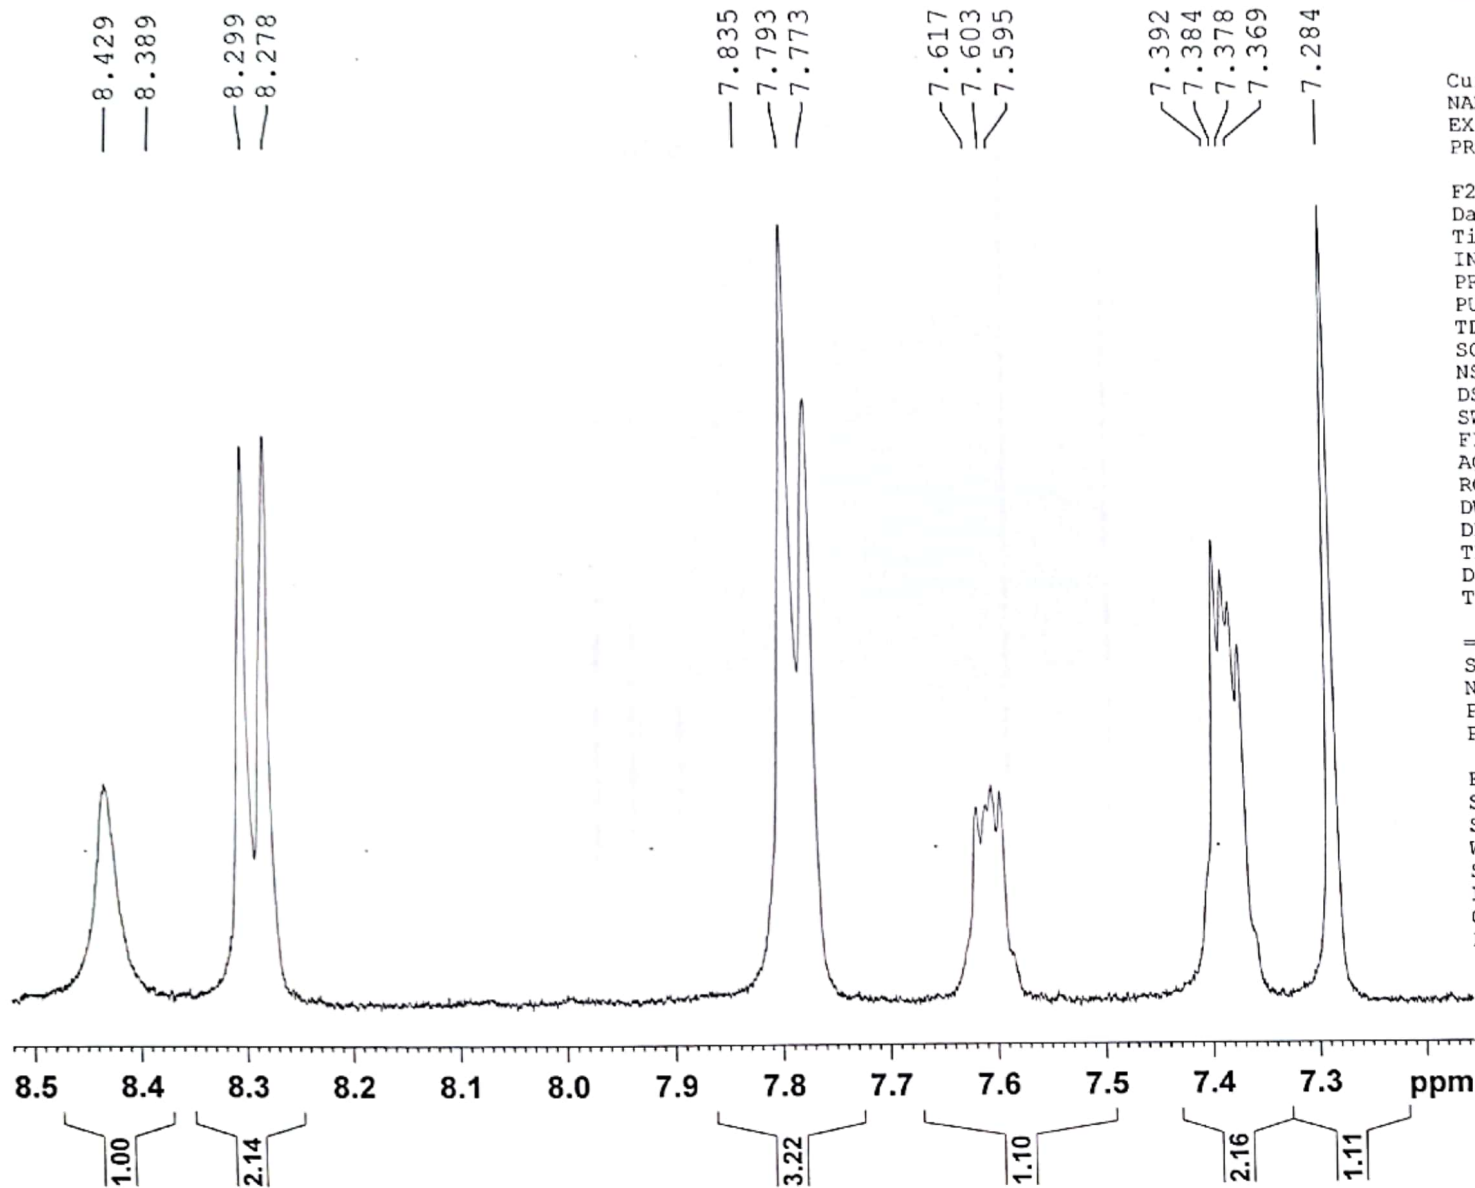

HEBA-13A  
 PROTON\_BSU DMSO {C:\data} nmr 9

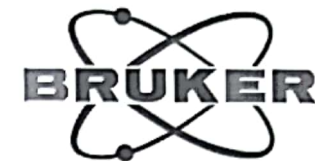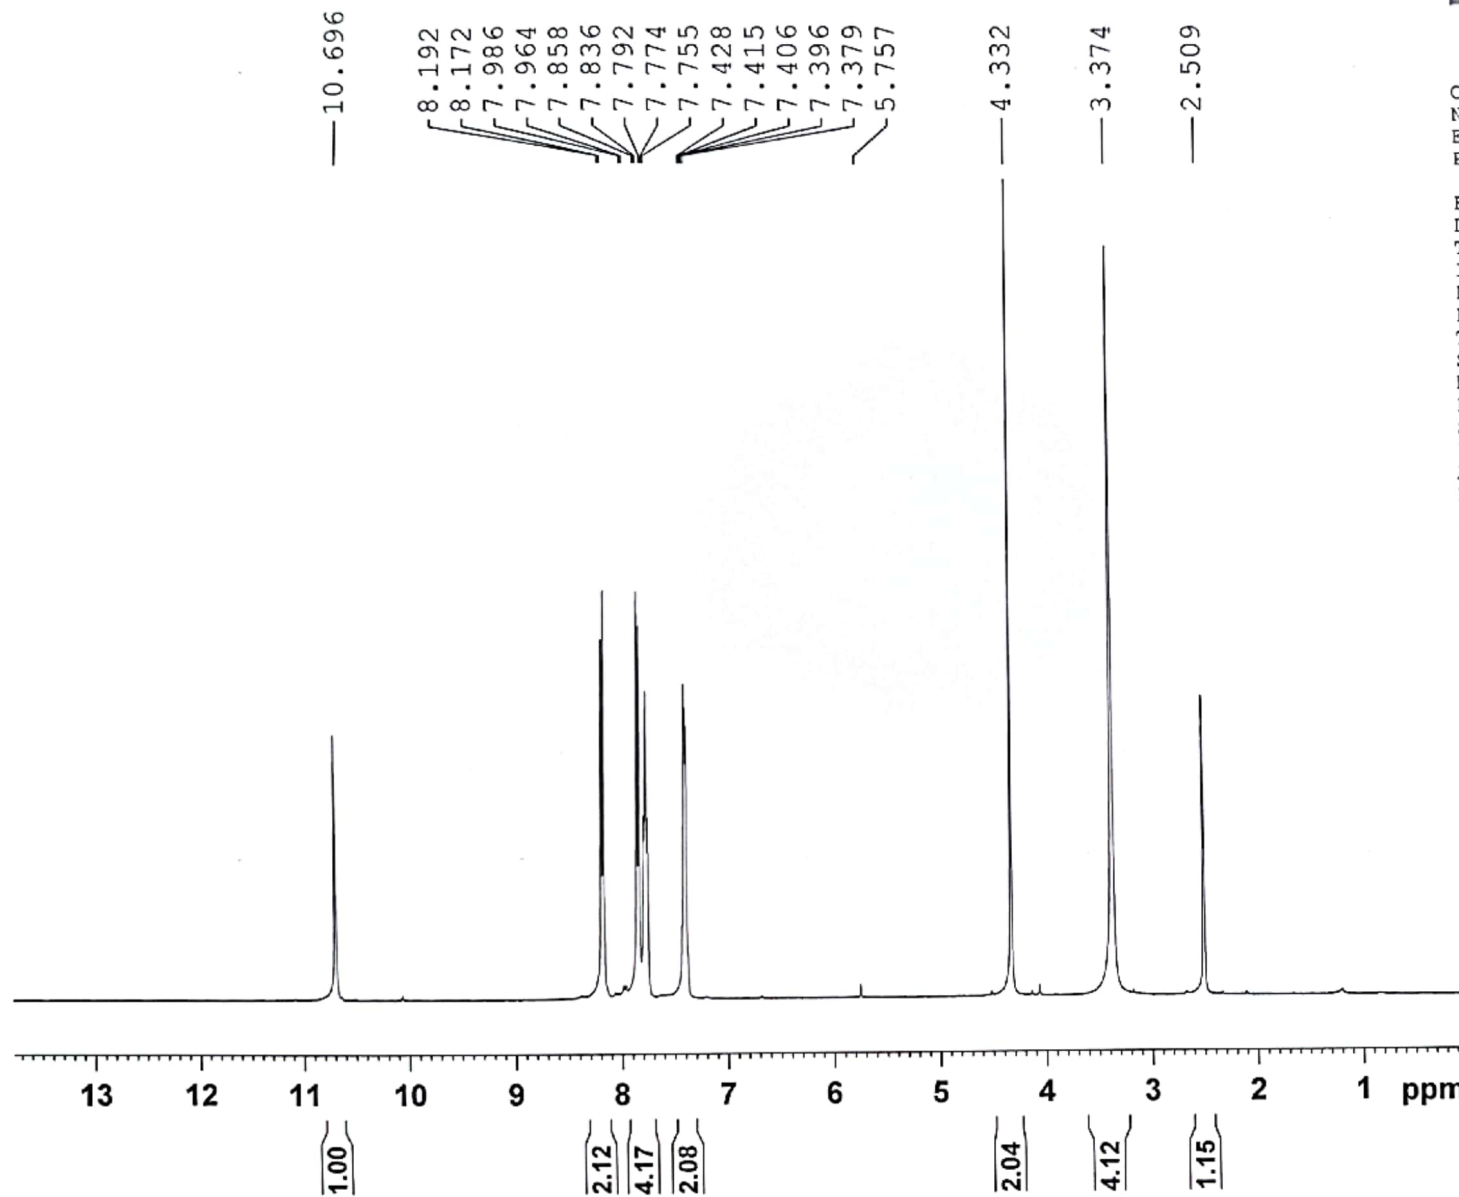

Current Data Parameters  
 NAME Jul15-2015-nmr  
 EXPNO 250  
 PROCNO 1

F2 - Acquisition Parameters  
 Date\_ 20150718  
 Time 11.37  
 INSTRUM spect  
 PROBHD 5 mm FABBO BB/  
 PULPROG zg30  
 TD 65536  
 SOLVENT DMSO  
 NS 16  
 DS 2  
 SWH 8012.820 Hz  
 FIDRES 0.122266 Hz  
 AQ 4.0894465 sec  
 RG 147.93  
 DW 62.400 usec  
 DE 6.50 usec  
 TE 298.2 K  
 D1 1.00000000 sec  
 TD0 1

===== CHANNEL f1 =====  
 SF01 400.1324710 MHz  
 NUC1 1H  
 P1 10.00 usec  
 PLW1 16.00000000 W

F2 - Processing parameters  
 SI 65536  
 SF 400.1300000 MHz  
 WDW EM  
 SSB 0  
 LB 0.10 Hz  
 GB 0  
 PC 1.00

HEBA-13A  
PROTON\_BSU DMSO {C:\data} nmr 9

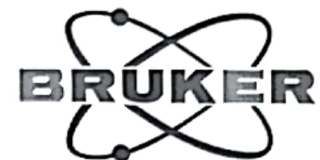

Current Data Parameters  
NAME Jul15-2015-nmr  
EXPNO 250  
PROCNO 1

F2 - Acquisition Parameters

Date\_ 20150718  
Time 11.37  
INSTRUM spect  
PROBHD 5 mm PABBO BB/  
PULPROG zg30  
TD 65536  
SOLVENT DMSO  
NS 16  
DS 2  
SWH 8012.820 Hz  
FIDRES 0.122266 Hz  
AQ 4.0894465 sec  
RG 147.93  
DW 62.400 usec  
DE 6.50 usec  
TE 298.2 K  
D1 1.00000000 sec  
TD0 1

==== CHANNEL f1 =====  
SFO1 400.1324710 MHz  
NUC1 1H  
P1 10.00 usec  
PLW1 16.00000000 W

F2 - Processing parameters  
SI 65536  
SF 400.1300000 MHz  
WDW EM  
SSB 0  
LB 0.10 Hz  
GB 0  
PC 1.00

8.192  
8.172  
7.986  
7.964  
7.858  
7.836  
7.792  
7.774  
7.755  
7.428  
7.415  
7.406  
7.396  
7.379

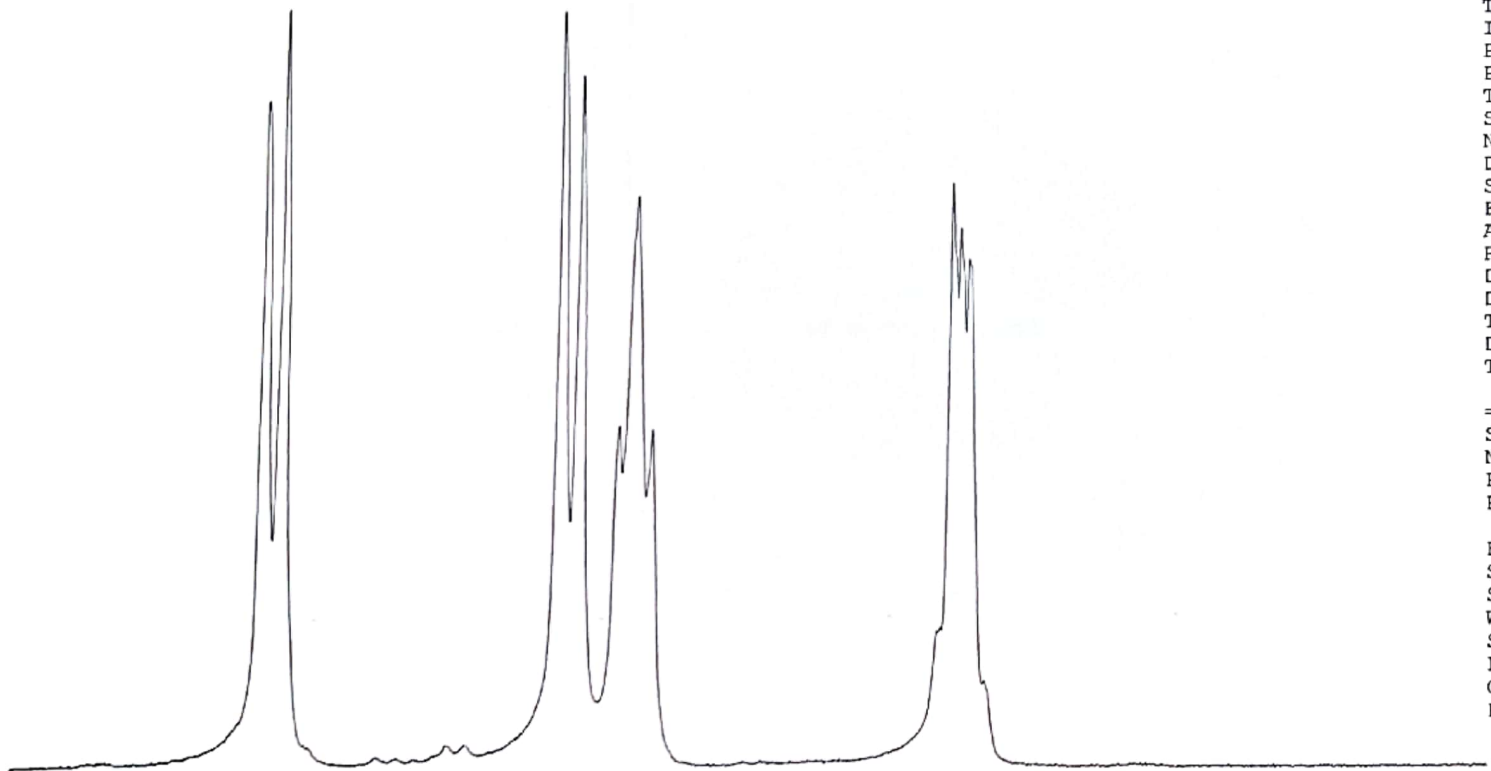

8.4 8.3 8.2 8.1 8.0 7.9 7.8 7.7 7.6 7.5 7.4 7.3 7.2 7.1 7.0 ppm

2.12  
4.17  
2.08



HEBA-13A  
DEPTQ-BSU DMSO {C:\data} nmr 9

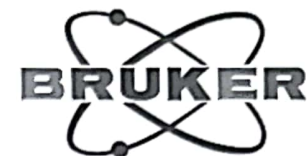

Current Data Parameters  
NAME Jul15-2015-nmr  
EXPNO 251  
PROCNO 1

F2 - Acquisition Parameters  
Date\_ 20150718  
Time\_ 15.26  
INSTRUM spect  
PROBHD 5 mm PABBO BB/  
PULPROG deptqqpsp  
TD 65536  
SOLVENT DMSO  
NS 4000  
DS 4  
SWH 24038.461 Hz  
FIDRES 0.366798 Hz  
AQ 1.3631488 sec  
RG 205.44  
DW 20.800 usec  
DE 6.50 usec  
TE 299.1 K  
CNST2 145.0000000  
CNST12 1.5000000  
D1 2.0000000 sec  
D2 0.00344828 sec  
D12 0.00002000 sec  
D16 0.00020000 sec  
TD0 1

----- CHANNEL f1 -----  
SF01 100.6228303 MHz  
NUC1 13C  
P1 10.00 usec  
P13 2000.00 usec  
PLW0 0 W  
PLW1 66.00000000 W  
SFPAM[5] Crp60comp.4  
SFOALS 0.500  
SFOFFS5 0 Hz  
SFW5 10.08399963 W

----- CHANNEL f2 -----  
SF02 400.1312797 MHz  
NUC2 1H  
CPDPRG[2] waltz16  
P0 15.75 usec  
P3 10.50 usec  
P4 21.00 usec  
PCPD2 90.00 usec  
PLW2 16.00000000 W  
PLW12 0.21777999 W

===== GRADIENT CHANNEL =====  
GPNAM[1] SMSQ10.100  
GPNAM[2] SMSQ10.100  
GPNAM[3] SMSQ10.100  
GPZ1 31.00 %  
GPZ2 31.00 %  
GPZ3 31.00 %  
P16 1000.00 usec

F2 - Processing parameters  
SI 32768  
SF 100.6127690 MHz  
WDW EM  
SSB 0  
LB 1.00 Hz  
GB 0  
PC 1.40

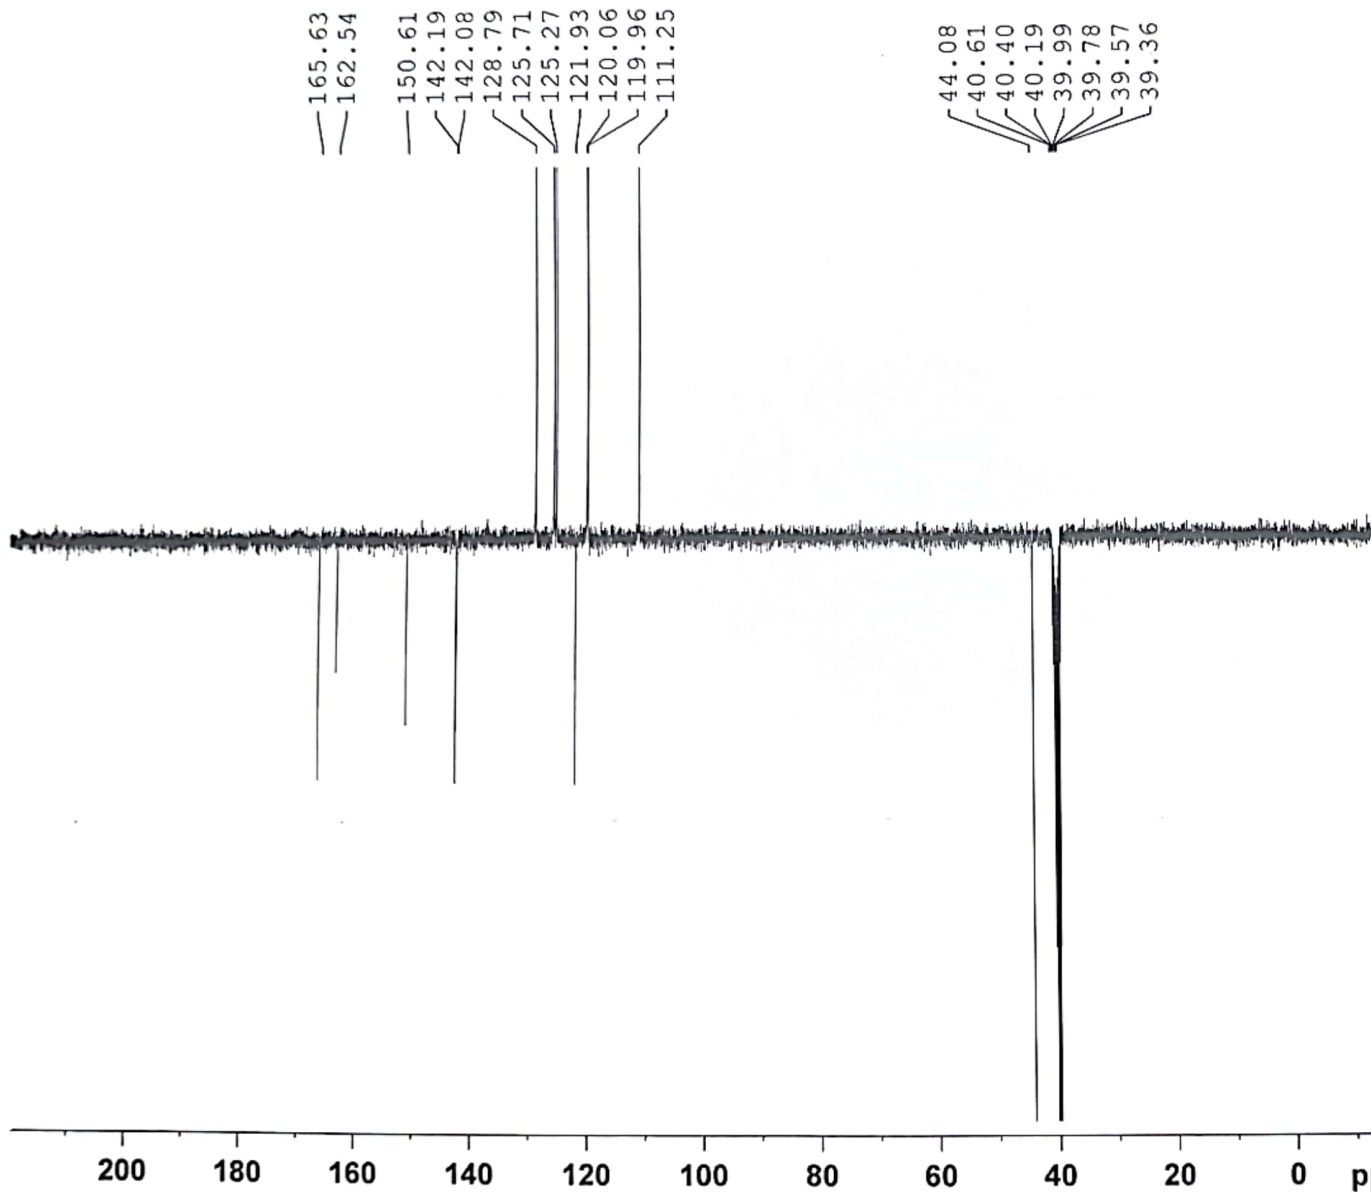

HEBA-13A  
DEPTQ-BSU DMSO {C:\data} nmr 9

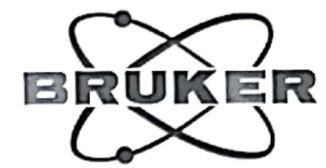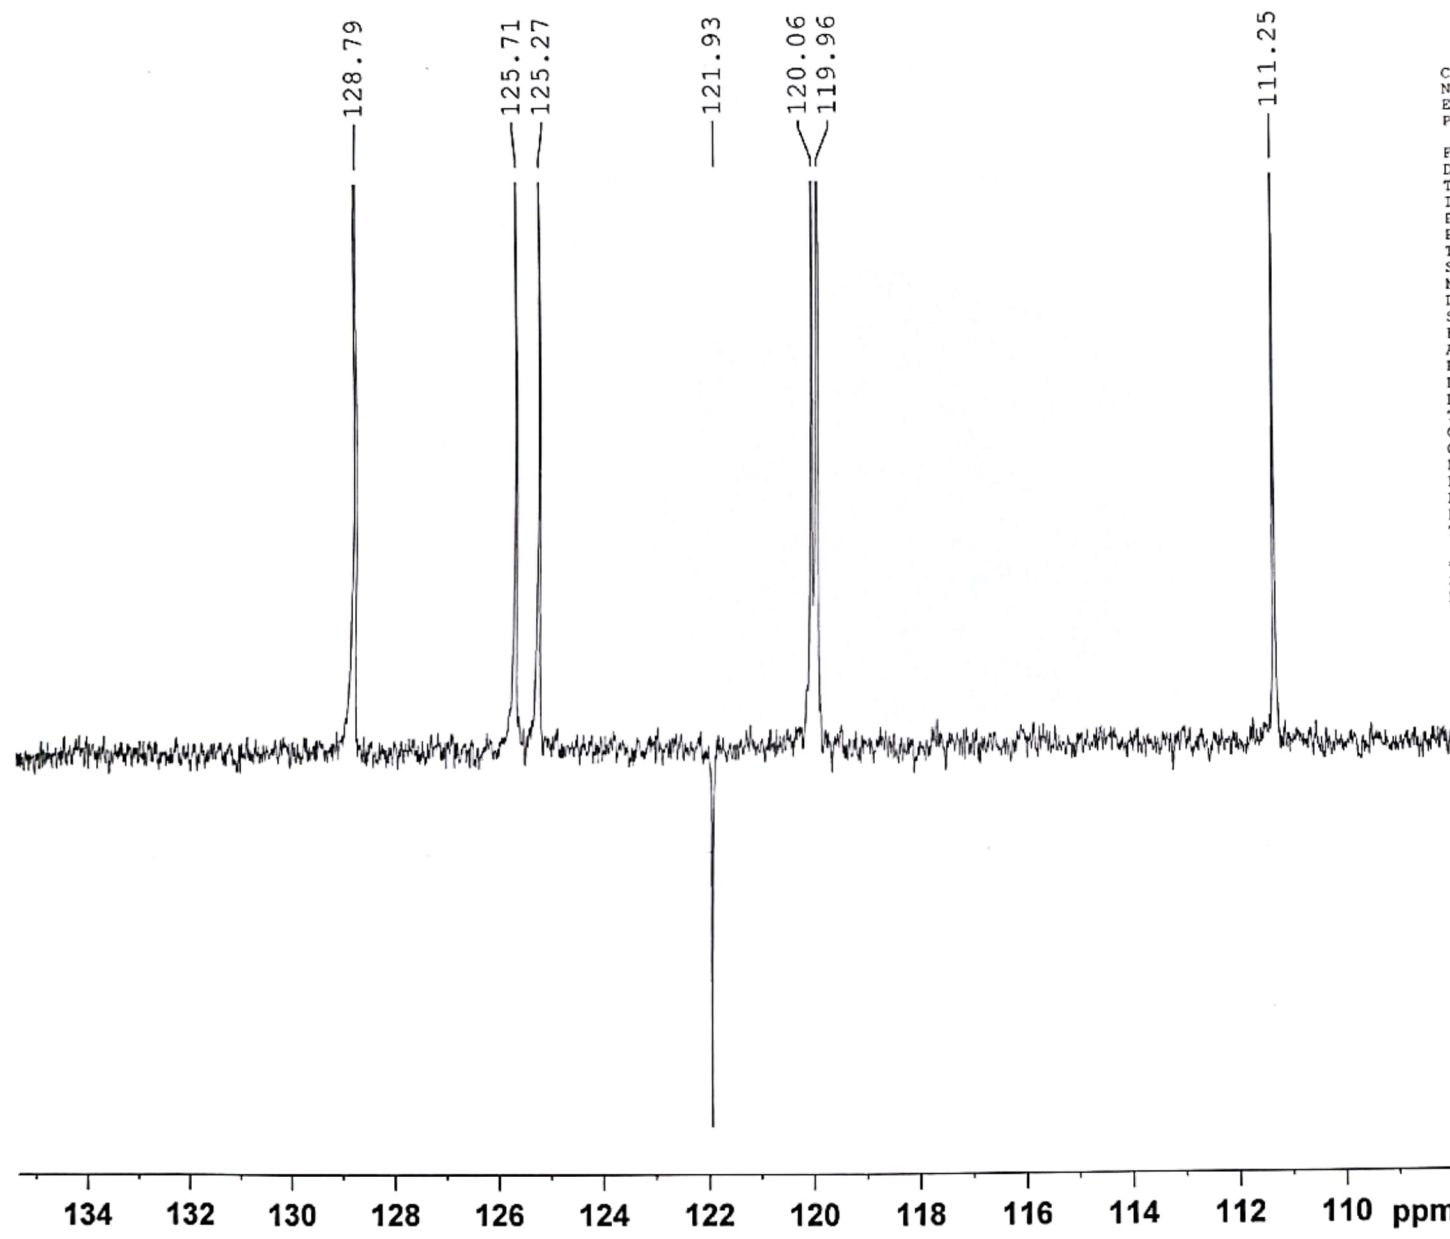

Current Data Parameters  
NAME Jul15-2015-nmr  
EXRNO 251  
PROCNO 1

F2 - Acquisition Parameters  
Date 20150718  
Time 15.26  
INSTRUM spect  
PROSHD 5 mm PABBO BB/  
PULPROG deptqgpgp  
TD 65536  
SOLVENT DMSO  
NS 4000  
DS 4  
SWH 24038.461 Hz  
FIDRES 0.366798 Hz  
AQ 1.3631488 sec  
RG 205.44  
DW 20.800 usec  
DE 6.50 usec  
TE 299.1 K  
CNST2 145.0000000  
CNST12 1.5000000  
D1 2.00000000 sec  
D2 0.00344828 sec  
D12 0.00002000 sec  
D16 0.00020000 sec  
TDO 1

===== CHANNEL f1 =====  
SFO1 100.6228303 MHz  
NUC1 13C  
P1 10.00 usec  
P13 2000.00 usec  
PLW0 0 W  
PLW1 66.00000000 W  
SPNAM[5] Crp60comp.4  
SFOAL5 0.500  
SPOFFS5 0 Hz  
SPW5 10.08399963 W

===== CHANNEL f2 =====  
SFO2 400.1312797 MHz  
NUC2 1H  
CPDPRG[2] waltz16  
P0 15.75 usec  
P3 10.50 usec  
P4 21.00 usec  
PCPD2 90.00 usec  
PLW2 16.00000000 W  
PLW12 0.21777999 W

===== GRADIENT CHANNEL =====  
GPNAM[1] SMSQ10.100  
GPNAM[2] SMSQ10.100  
GPNAM[3] SMSQ10.100  
GPZ1 31.00 %  
GPZ2 31.00 %  
GPZ3 31.00 %  
P16 1000.00 usec

F2 - Processing parameters  
SI 32768  
SF 100.6127690 MHz  
WDW EM  
SSB 0  
LB 1.00 Hz  
GB 0  
PC 1.40

13C-13A  
DEPTQ-BSU DMSO {C:\data} nmr 9

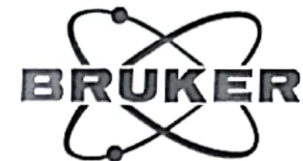

Current Data Parameters  
NAME Jul15-2015-nmr  
EXFNO 251  
PROCNO 1

F2 - Acquisition Parameters

Date 20150718  
Time 15.26  
INSTRUM spect  
PROBHD 5 mm F4BBO BB/  
PULPROG deptqppsp  
TD 65536  
SOLVENT DMSO  
NS 4000  
DS 4  
SWH 24038.461 Hz  
FIDRES 0.366798 Hz  
AQ 1.3631488 sec  
RG 205.44  
DW 20.800 usec  
DE 6.50 usec  
TE 299.1 K  
CNST2 145.0000000  
CNST12 1.5000000  
D1 2.00000000 sec  
D2 0.00344828 sec  
D12 0.00002000 sec  
D16 0.00020000 sec  
TD0 1

===== CHANNEL f1 =====  
SF01 100.6228303 MHz  
NUC1 13C  
P1 10.00 usec  
P13 2000.00 usec  
PLW0 0 W  
PLW1 66.00000000 W  
SPNAM[5] Crp60comp.4  
SPOAL5 0.500  
SPOFESS 0 Hz  
SPW5 10.08399963 W

===== CHANNEL f2 =====  
SF02 400.1312797 MHz  
NUC2 1H  
CPDPRG[2] waltz16  
P0 15.75 usec  
P3 10.50 usec  
P4 21.00 usec  
PCPD2 90.00 usec  
PLW2 16.00000000 W  
PLW12 0.21777999 W

===== GRADIENT CHANNEL =====  
GPNAM[1] SMSQ10.100  
GPNAM[2] SMSQ10.100  
GPNAM[3] SMSQ10.100  
GPZ1 31.00 %  
GPZ2 31.00 %  
GPZ3 31.00 %  
P16 1000.00 usec

F2 - Processing parameters  
SI 32768  
SF 100.6127690 MHz  
WDW EM  
SSB 0  
LB 1.00 Hz  
GB 0  
PC 1.40

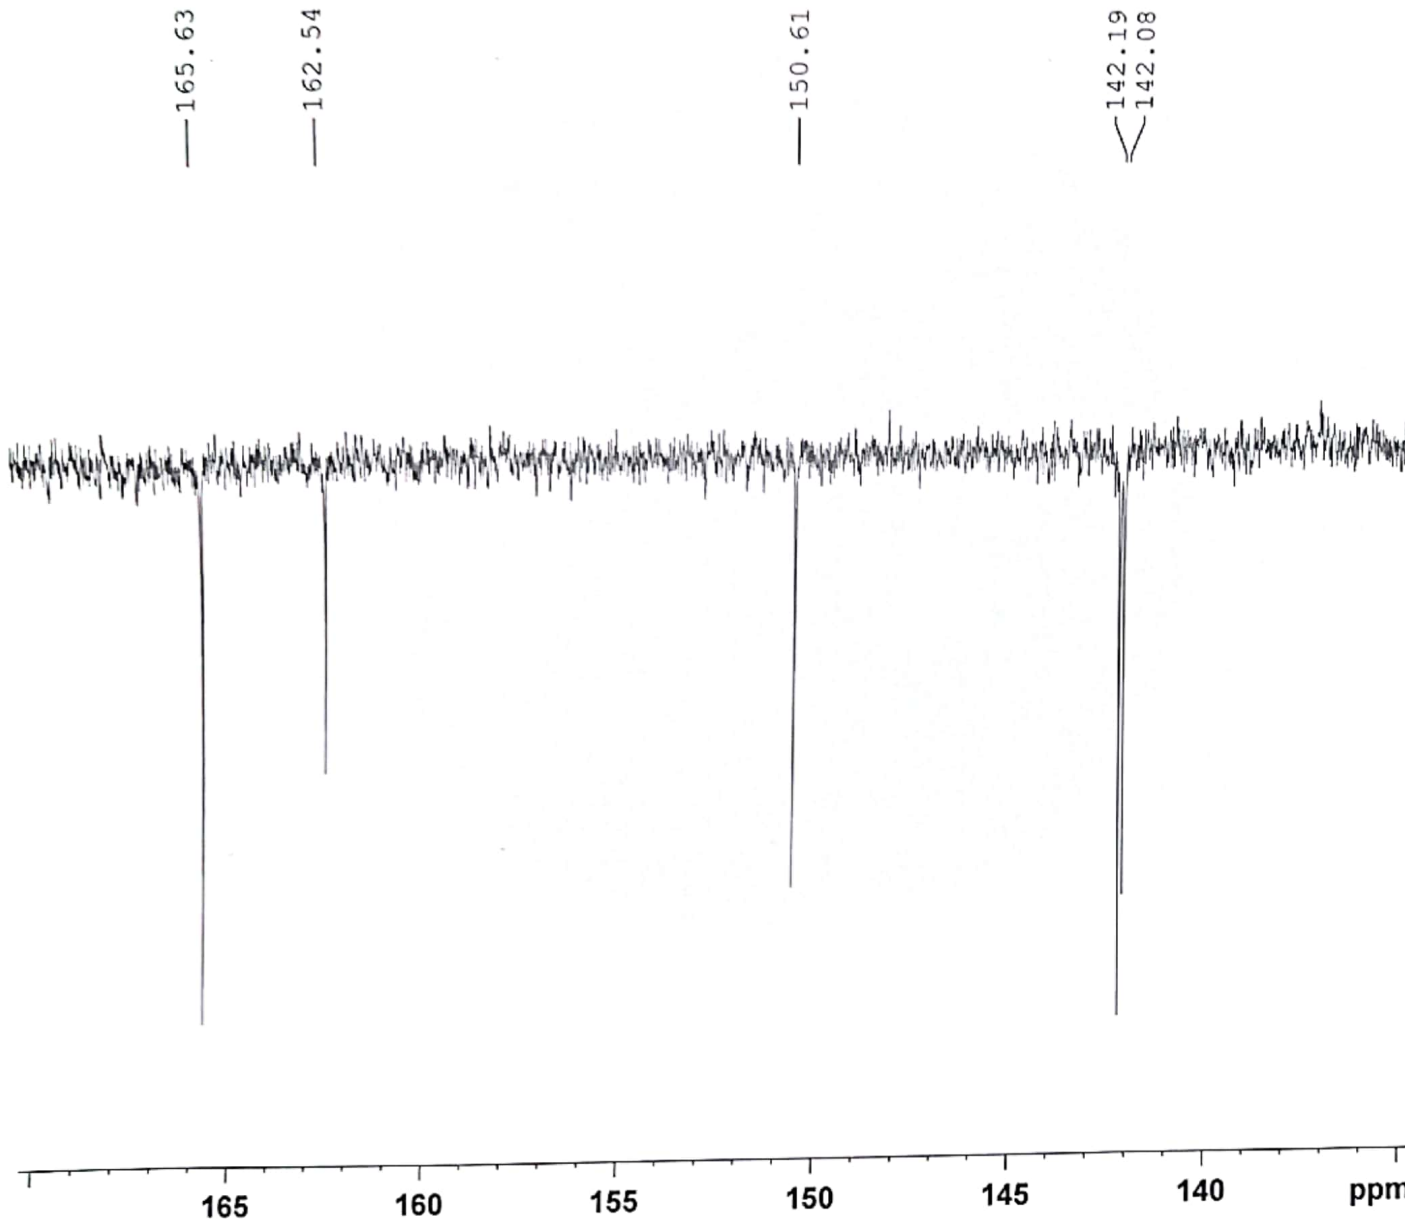

HEBA-13C  
PROTON\_BSU DMSO {C:\data} nmr 22

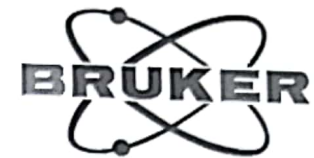

Current Data Parameters  
NAME Apr28-2015-nmr  
EXPNO 290  
PROCNO 1

F2 - Acquisition Parameters  
Date\_ 20150428  
Time\_ 12.23  
INSTRUM spect  
PROBHD 5 mm PABBO BB/  
PULPROG zg30  
TD 65536  
SOLVENT DMSO  
NS 16  
DS 2  
SWH 8012.820 Hz  
FIDRES 0.122266 Hz  
AQ 4.0894465 sec  
RG 81.84  
DW 62.400 usec  
DE 6.50 usec  
TE 294.1 K  
D1 1.00000000 sec  
TD0 1

==== CHANNEL f1 =====  
SFO1 400.1324710 MHz  
NUC1 1H  
P1 10.00 usec  
PLW1 16.00000000 W

F2 - Processing parameters  
SI 65536  
SF 400.1300000 MHz  
WDW EM  
SSB 0  
LB 0.10 Hz  
GB 0  
PC 1.00

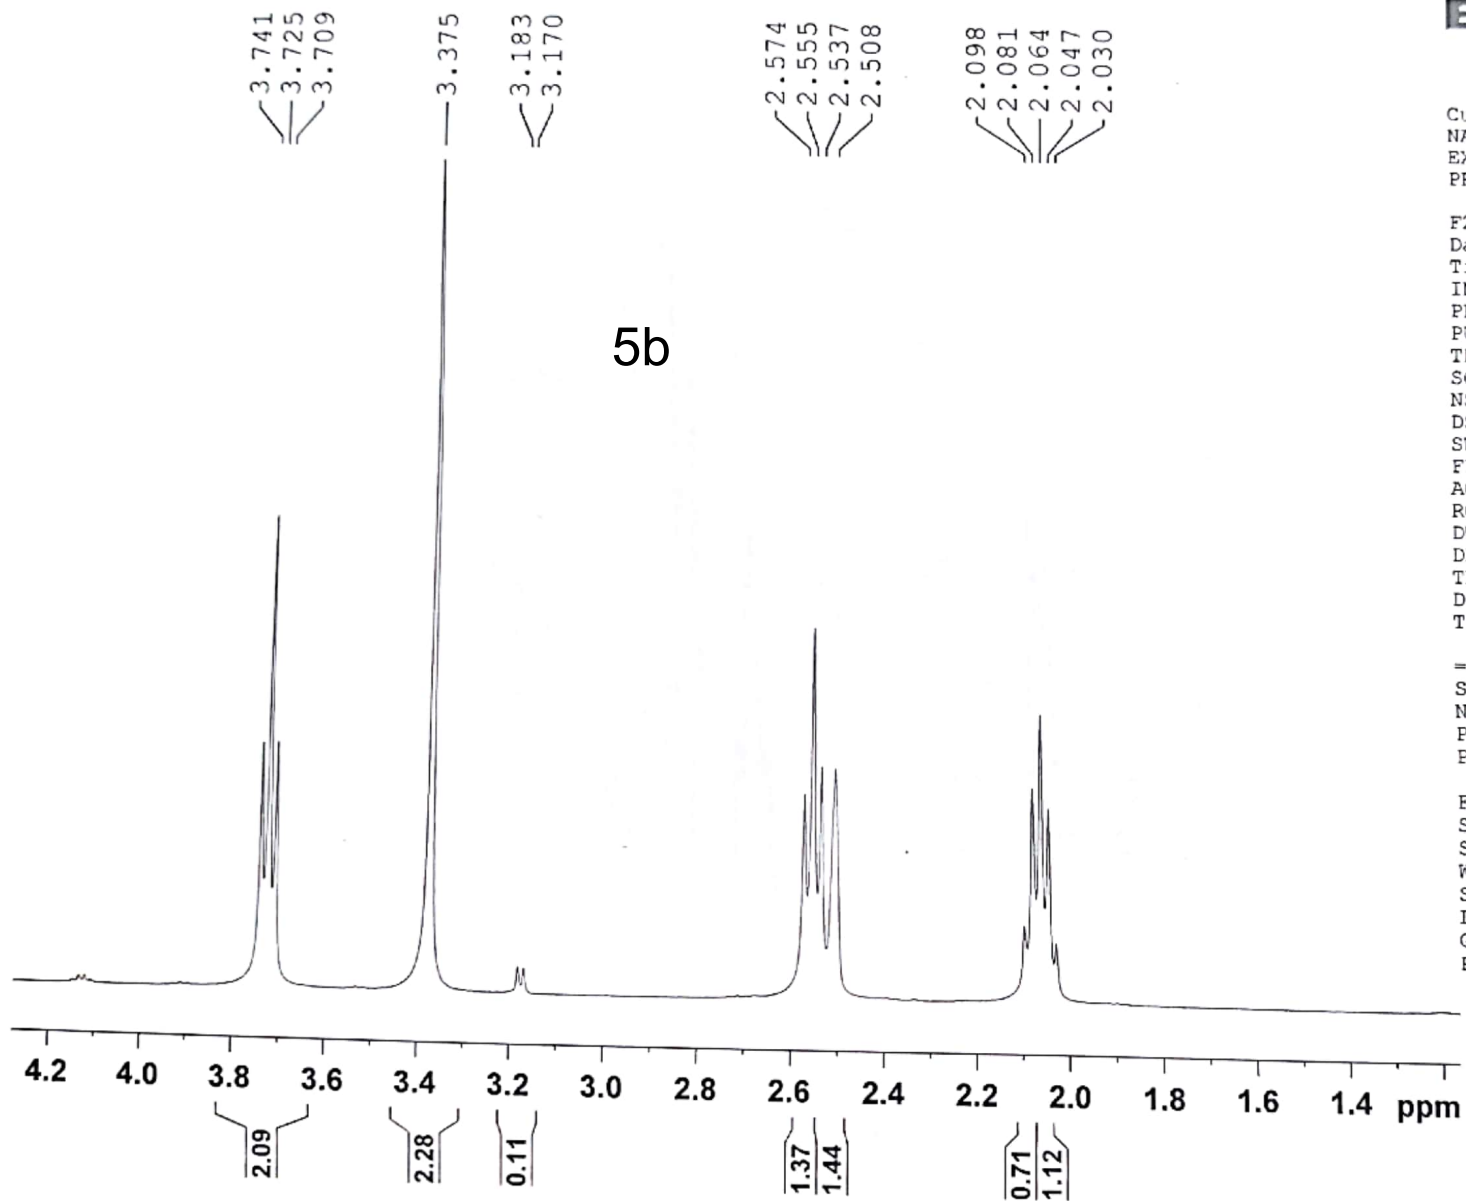

HEBA-13C  
PROTON\_BSU DMSO {C:\data} nmr 22

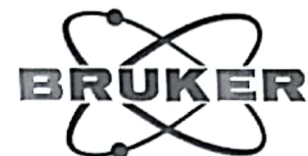

Current Data Parameters  
NAME Apr28-2015-nmr  
EXPNO 290  
PROCNO 1

F2 - Acquisition Parameters  
Date\_ 20150428  
Time\_ 12.23  
INSTRUM spect  
PROBHD 5 mm PABBO BB/  
PULPROG zg30  
TD 65536  
SOLVENT DMSO  
NS 16  
DS 2  
SWH 8012.820 Hz  
FIDRES 0.122266 Hz  
AQ 4.0894465 sec  
RG 81.84  
DW 62.400 usec  
DE 6.50 usec  
TE 294.1 K  
D1 1.0000000 sec  
TD0 1

===== CHANNEL f1 =====  
SF01 400.1324710 MHz  
NUC1 1H  
P1 10.00 usec  
PLW1 16.00000000 W

F2 - Processing parameters  
SI 65536  
SF 400.1300000 MHz  
WDW EM  
SSB 0  
LB 0.10 Hz  
GB 0  
PC 1.00

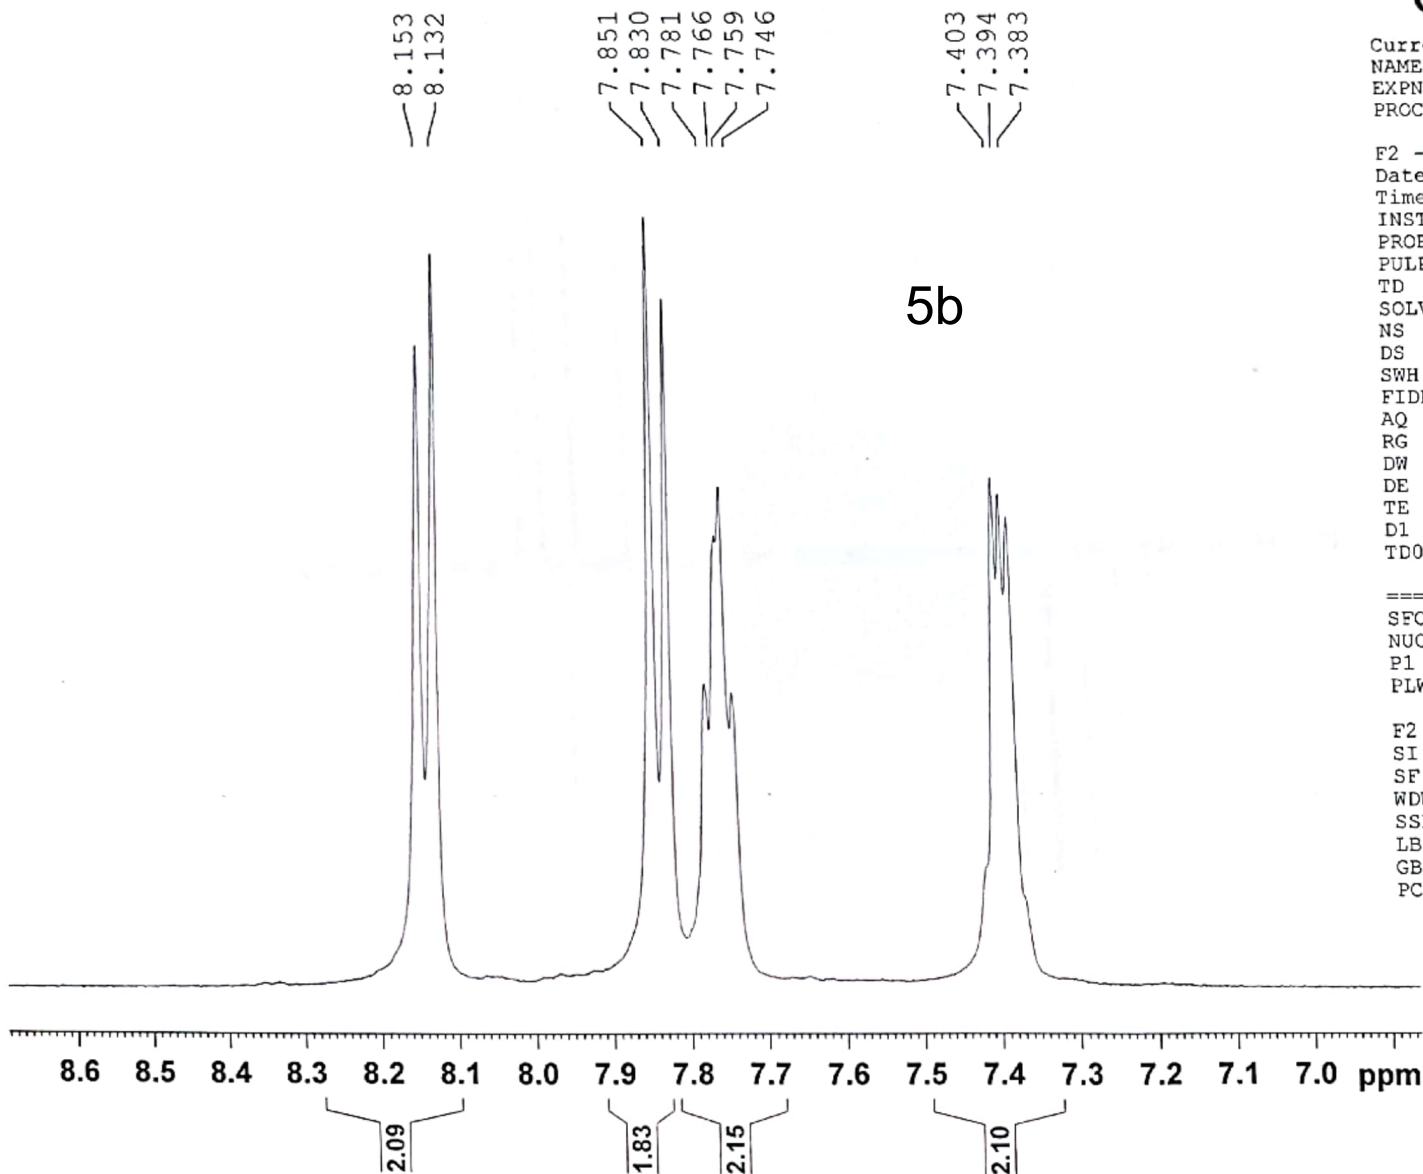

HEBA-13C  
DEPTQ-BSU DMSO {C:\data} nmr 2

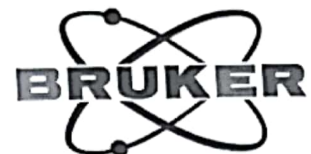

Current Data Parameters  
NAME May04-2015-nmr  
EXPNO 50  
PROCNO 1

F2 - Acquisition Parameters  
Date\_ 20150505  
Time 8.59  
INSTRUM spect  
PROBHD 5 mm PABBO BB/  
PULPROG deptqqpsp  
TD 65536  
SOLVENT DMSO  
NS 3685  
DS 4  
SWH 24038.461 Hz  
FIDRES 0.366798 Hz  
AQ 1.3631488 sec  
RG 205.44  
DW 20.800 usec  
DE 6.50 usec  
TE 294.8 K  
CNST2 145.0000000  
CNST12 1.5000000  
D1 2.00000000 sec  
D2 0.00344828 sec  
D12 0.00020000 sec  
D16 0.00020000 sec  
TD0 1

===== CHANNEL f1 =====  
SFO1 100.6228303 MHz  
NUC1 13C  
P1 10.00 usec  
P13 2000.00 usec  
PLW0 0 W  
PLW1 66.00000000 W  
SPNAM[S] Crp60comp.4  
SPOALS 0.500  
SPOFFS5 0 Hz  
SPW5 10.08399963 W

===== CHANNEL f2 =====  
SFO2 400.1312797 MHz  
NUC2 1H  
CPDPRG[2] waltz16  
P0 15.75 usec  
P3 10.50 usec  
P4 21.00 usec  
PCPD2 90.00 usec  
PLW2 16.00000000 W  
PLW12 0.21777999 W

===== GRADIENT CHANNEL =====  
GPNAM[1] SMSQ10.100  
GPNAM[2] SMSQ10.100  
GPNAM[3] SMSQ10.100  
GPZ1 31.00 %  
GPZ2 31.00 %  
GPZ3 31.00 %  
P16 1000.00 usec

F2 - Processing parameters  
SI 32768  
SF 100.6127690 MHz  
WDW EM  
SSB 0  
LB 1.00 Hz  
GB C  
PC 1.40

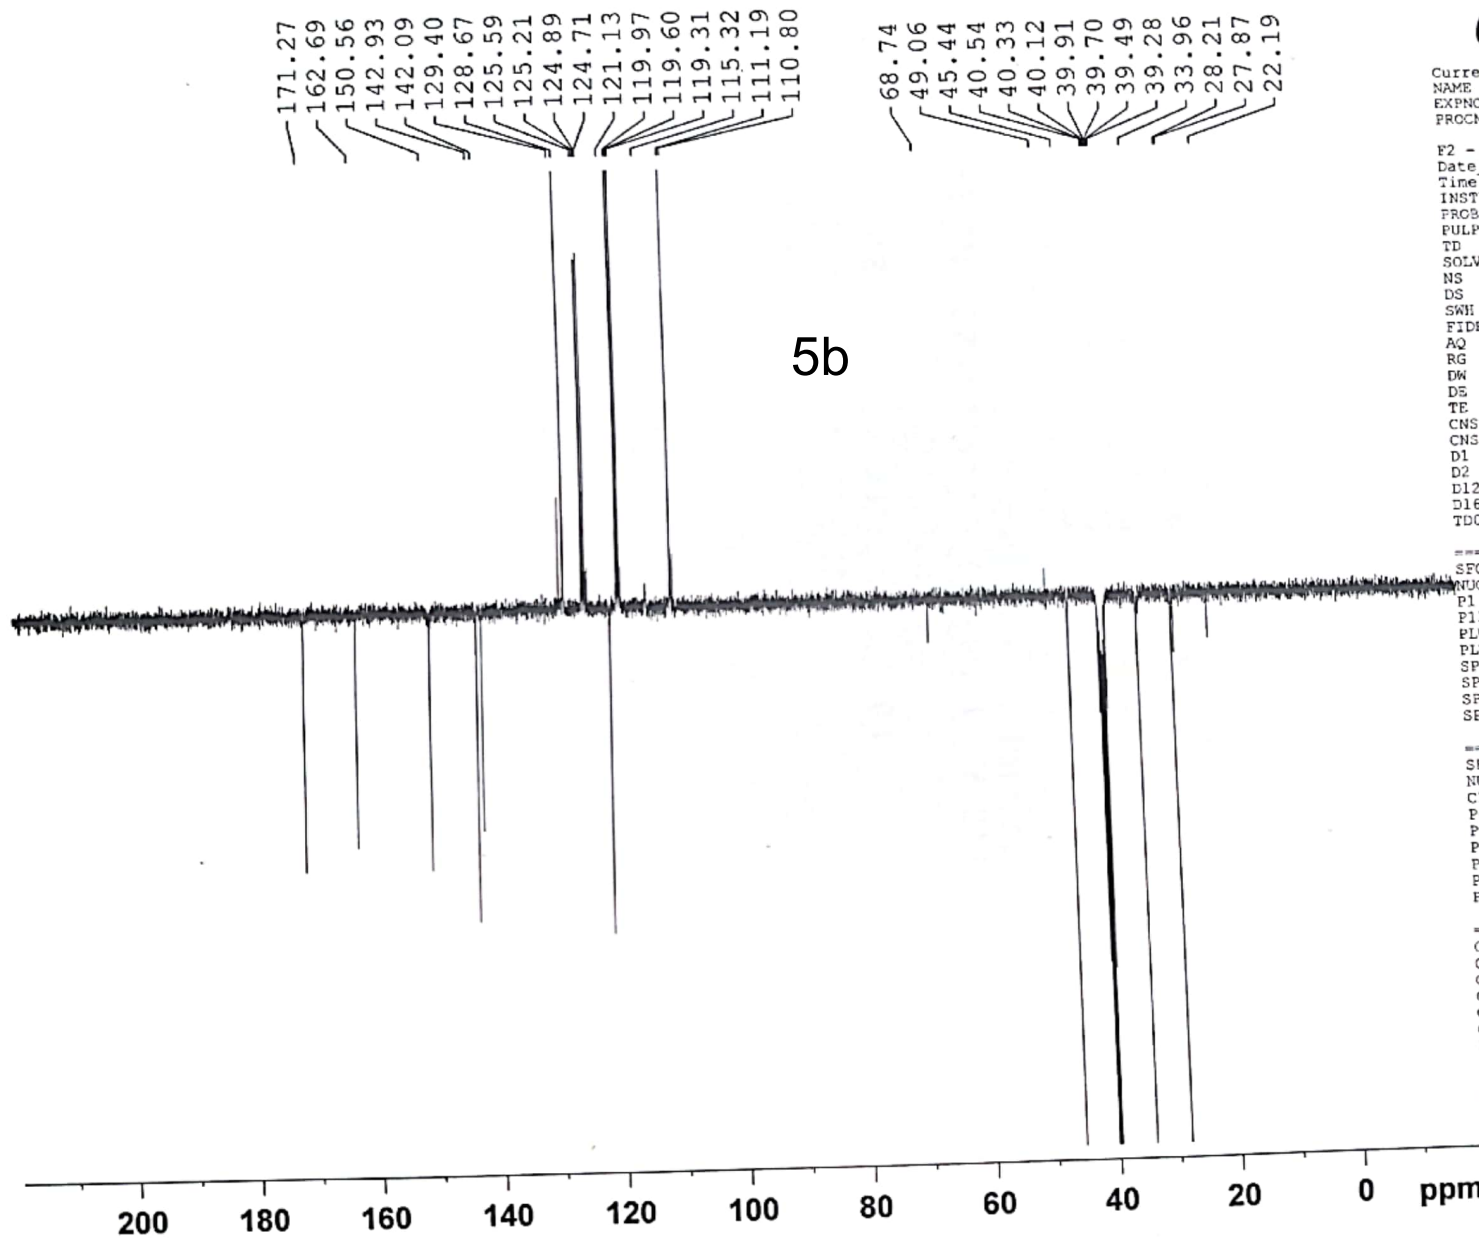

171.27  
162.69  
150.56  
142.93  
142.09  
129.40  
128.67  
125.59  
125.21  
124.89  
124.71  
121.13  
119.97  
119.60  
119.31  
115.32  
111.19  
110.80

68.74  
49.06  
45.44  
40.54  
40.33  
40.12  
39.91  
39.70  
39.49  
39.28  
33.96  
28.21  
27.87  
22.19

RT: 0.11 - 2.66 SM: 15B

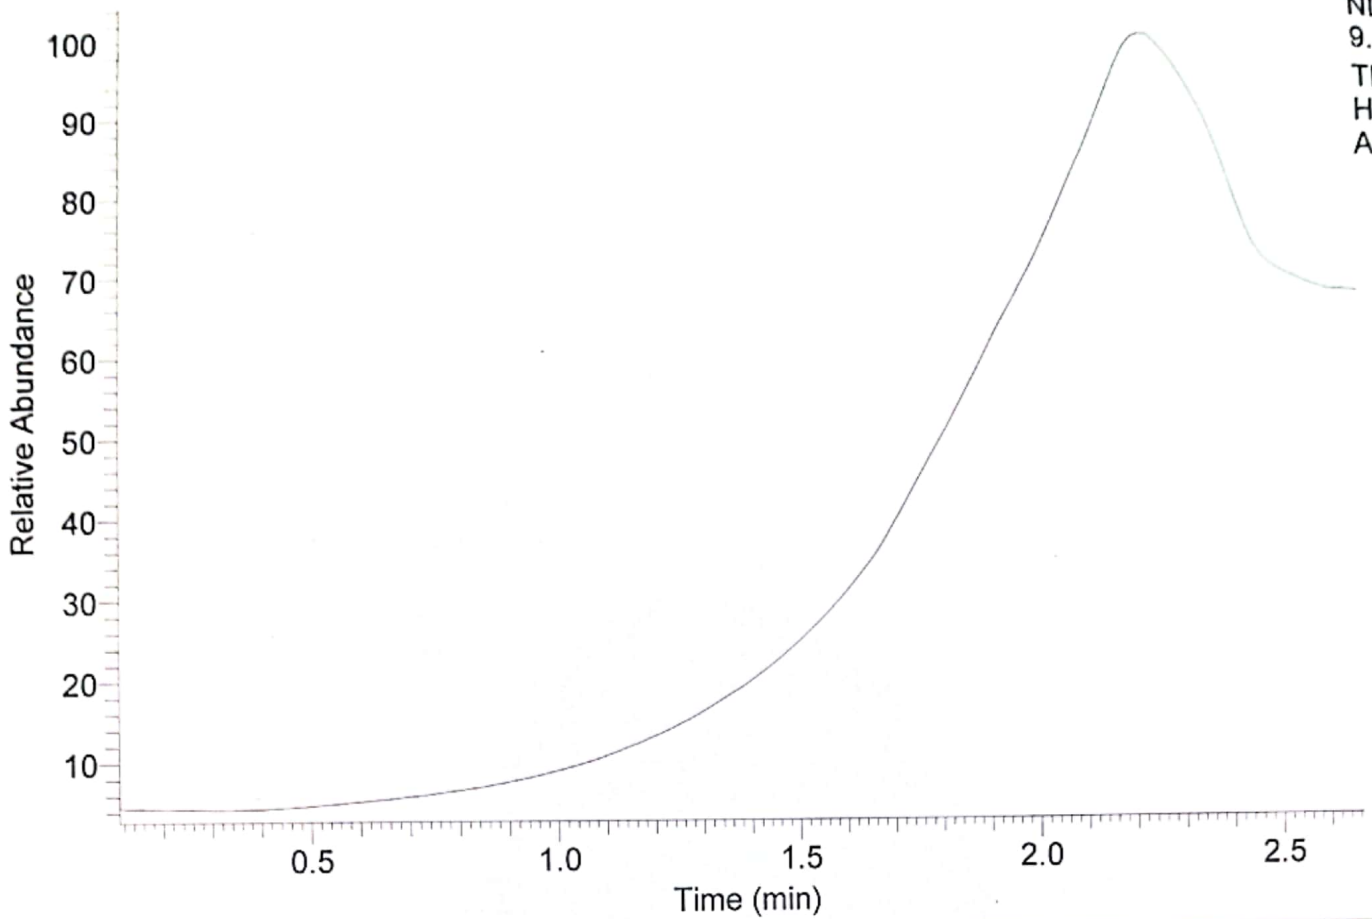

NL: 9.13E7  
TIC MS  
HEBA-ATEF-13C

HEBA-ATEF-13C #132 RT: 2.23 AV: 1 SB: 20 2.09-2.24 , 2.11-2.26 NL: 2.45E6  
T: {0,0} + c EI Full ms [40.00-1000.00]

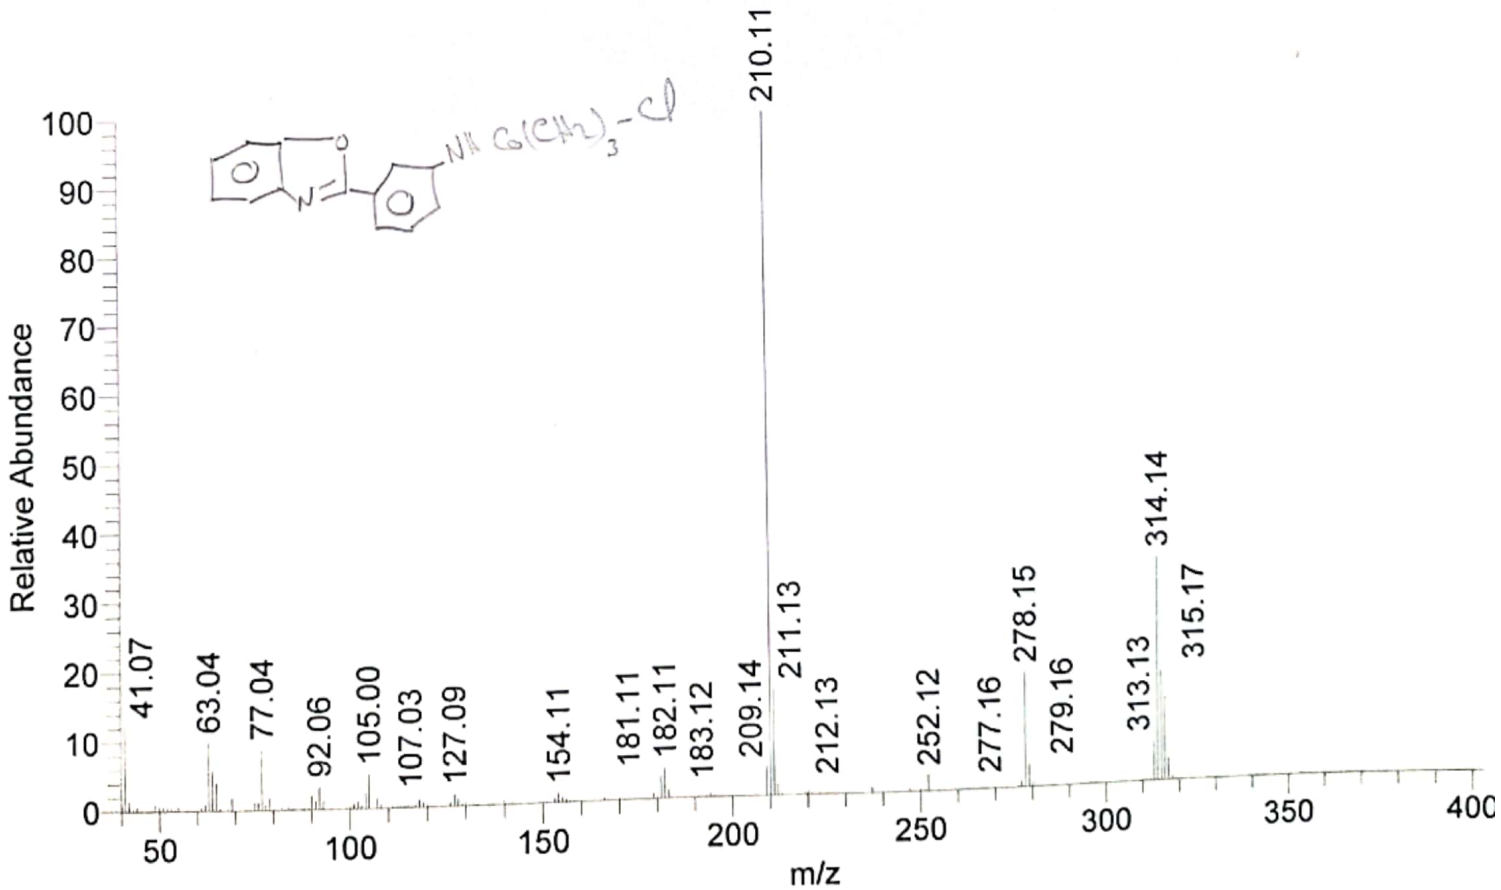

HEBA-ATEF-13C#132 RT: 2.23  
SB: 20 2.09-2.24 , 2.11-2.26  
T: (0,0) + c EI Full ms [40.00-1000.00]  
m/z= 40.00-403.24

| m/z    | Intensity | Relative |
|--------|-----------|----------|
| 40.17  | 18571.0   | 0.76     |
| 41.07  | 301330.9  | 12.30    |
| 42.07  | 33646.5   | 1.37     |
| 49.00  | 23966.5   | 0.98     |
| 55.05  | 17728.1   | 0.72     |
| 62.04  | 22549.1   | 0.92     |
| 63.04  | 244655.2  | 9.98     |
| 64.05  | 139625.3  | 5.70     |
| 65.06  | 97373.1   | 3.97     |
| 69.16  | 44389.5   | 1.81     |
| 75.05  | 27301.7   | 1.11     |
| 76.08  | 26919.3   | 1.10     |
| 77.04  | 216119.4  | 8.82     |
| 78.07  | 18742.4   | 0.76     |
| 79.05  | 41918.7   | 1.71     |
| 90.08  | 49673.5   | 2.03     |
| 91.07  | 30724.9   | 1.25     |
| 92.06  | 79311.6   | 3.24     |
| 93.07  | 28873.0   | 1.18     |
| 102.06 | 21160.5   | 0.86     |
| 104.13 | 54559.9   | 2.23     |
| 105.00 | 119958.8  | 4.89     |
| 107.03 | 33946.4   | 1.39     |
| 118.10 | 24660.4   | 1.01     |
| 119.03 | 18112.8   | 0.74     |
| 127.09 | 42324.6   | 1.73     |
| 128.08 | 24754.0   | 1.01     |
| 154.11 | 30984.5   | 1.26     |
| 181.11 | 80646.1   | 3.29     |
| 182.11 | 107035.9  | 4.37     |
| 183.12 | 29606.4   | 1.21     |
| 209.14 | 104506.1  | 4.26     |
| 210.11 | 2450818.0 | 100.00   |
| 211.13 | 383757.4  | 15.66    |
| 212.13 | 38601.8   | 1.58     |
| 252.12 | 59193.8   | 2.42     |
| 277.16 | 23491.0   | 0.96     |
| 278.15 | 419941.8  | 17.13    |
| 279.16 | 80647.8   | 3.29     |
| 313.13 | 147587.3  | 6.02     |
| 314.14 | 818728.8  | 33.41    |
| 315.17 | 404981.1  | 16.52    |
| 316.15 | 307235.3  | 12.54    |
| 317.15 | 80292.7   | 3.28     |



13C  
1Q-BSU DMSO {C:\data} nmr 2

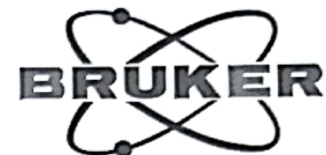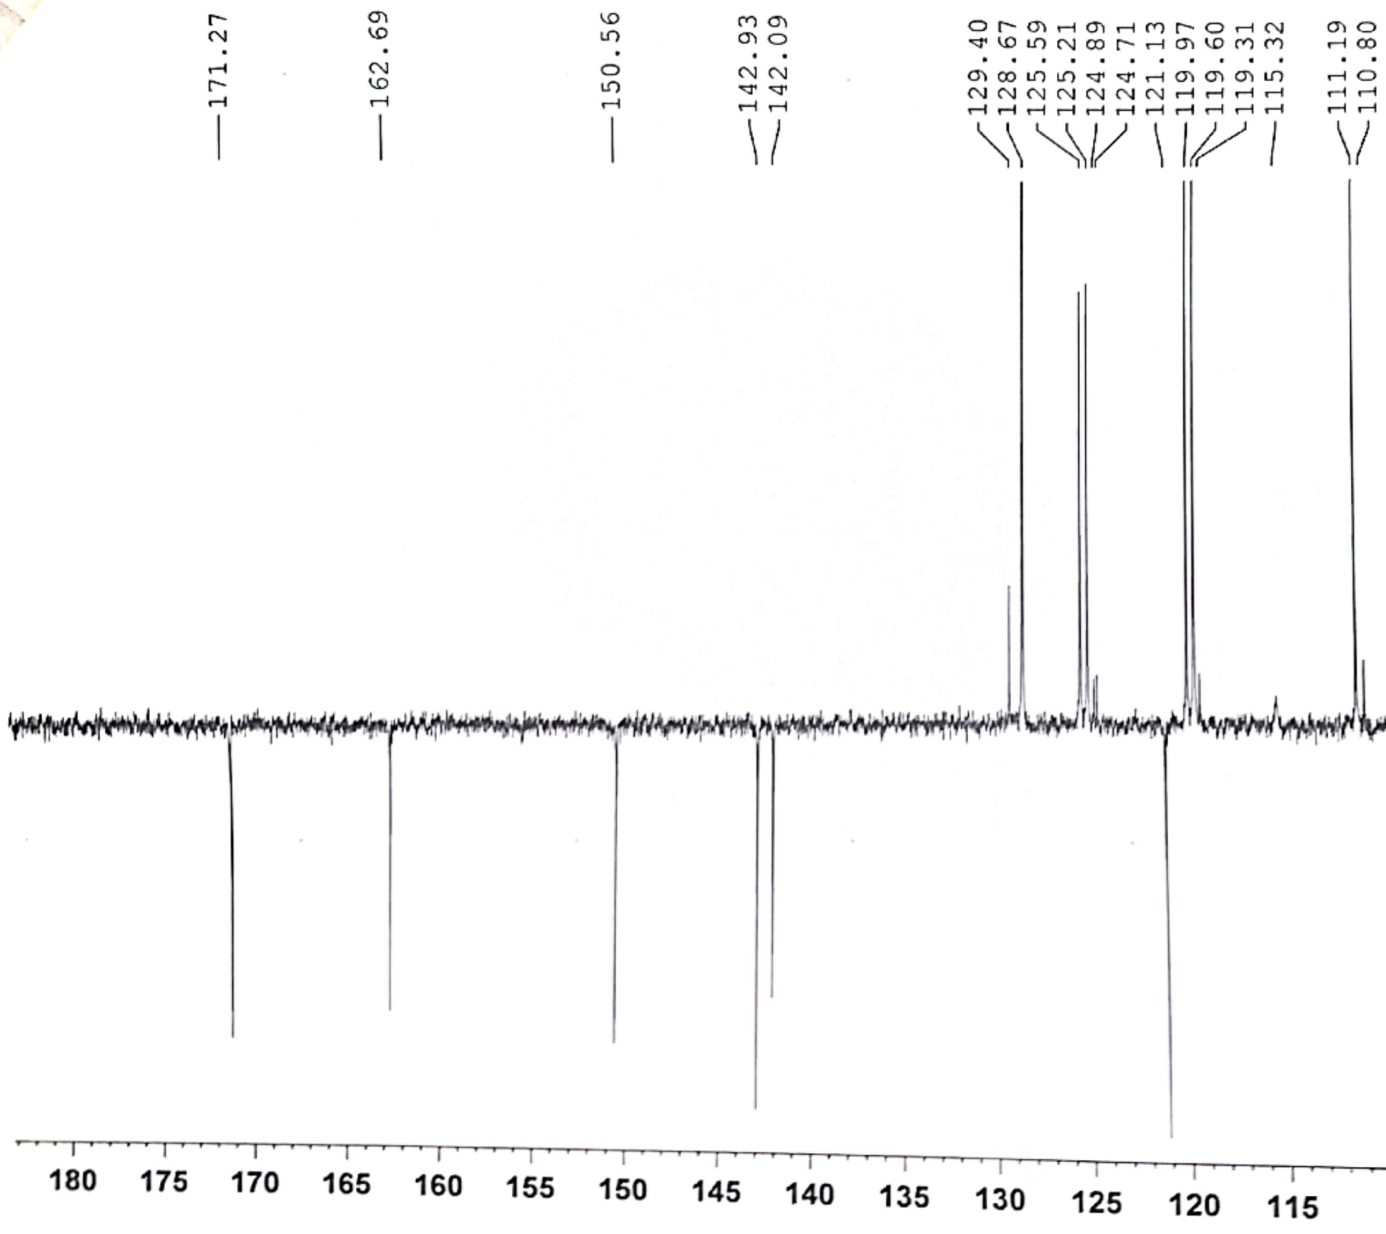

Current Data Parameters  
NAME May04-2015-nmr  
EXPNO 50  
PROCNO 1

F2 - Acquisition Parameters  
Date\_ 20150505  
Time\_ 8.59  
INSTRUM spect  
PROBHD 5 mm PABBO BB/  
PULPROG deptqqpsp  
TD 65536  
SOLVENT DMSO  
NS 3685  
DS 4  
SWH 24038.461 Hz  
FIDRES 0.366799 Hz  
AQ 1.3631488 sec  
RG 205.44  
LW 20.800 usec  
DE 6.50 usec  
TE 294.8 K  
CNST2 145.0000000  
CNST12 1.5000000  
D1 2.00000000 sec  
D2 0.00344828 sec  
D12 0.00002000 sec  
D16 0.00020000 sec  
TD0 1

----- CHANNEL f1 -----  
SFO1 100.6228303 MHz  
NUC1 13C  
P1 10.00 usec  
P13 2000.00 usec  
PLW0 0 W  
PLW1 66.00000000 W  
SFOFF5 0 Hz  
SFOFF5 10.08399963 W

----- CHANNEL f2 -----  
SFO2 400.1312797 MHz  
NUC2 1H  
CPDPRG2 waltz16  
P0 15.75 usec  
P3 10.50 usec  
P4 21.00 usec  
PCPD2 90.00 usec  
PLW2 16.00000000 W  
PLW12 0.21777999 W

----- GRADIENT CHANNEL -----  
GPNAM[1] SMSQ10.100  
GPNAM[2] SMSQ10.100  
GPNAM[3] SMSQ10.100  
GF21 31.00 %  
GF22 31.00 %  
GF23 31.00 %  
F16 1000.00 usec

F2 - Processing parameters  
SI 32768  
SF 100.6127690 MHz  
WDW EM  
SSB 0  
LB 1.00 Hz  
GB 0  
PC 1.40

RT: 0.21 - 2.87 SM: 15B

NL:  
3.79E8  
TIC MS  
HEBA-  
ATEF-13A

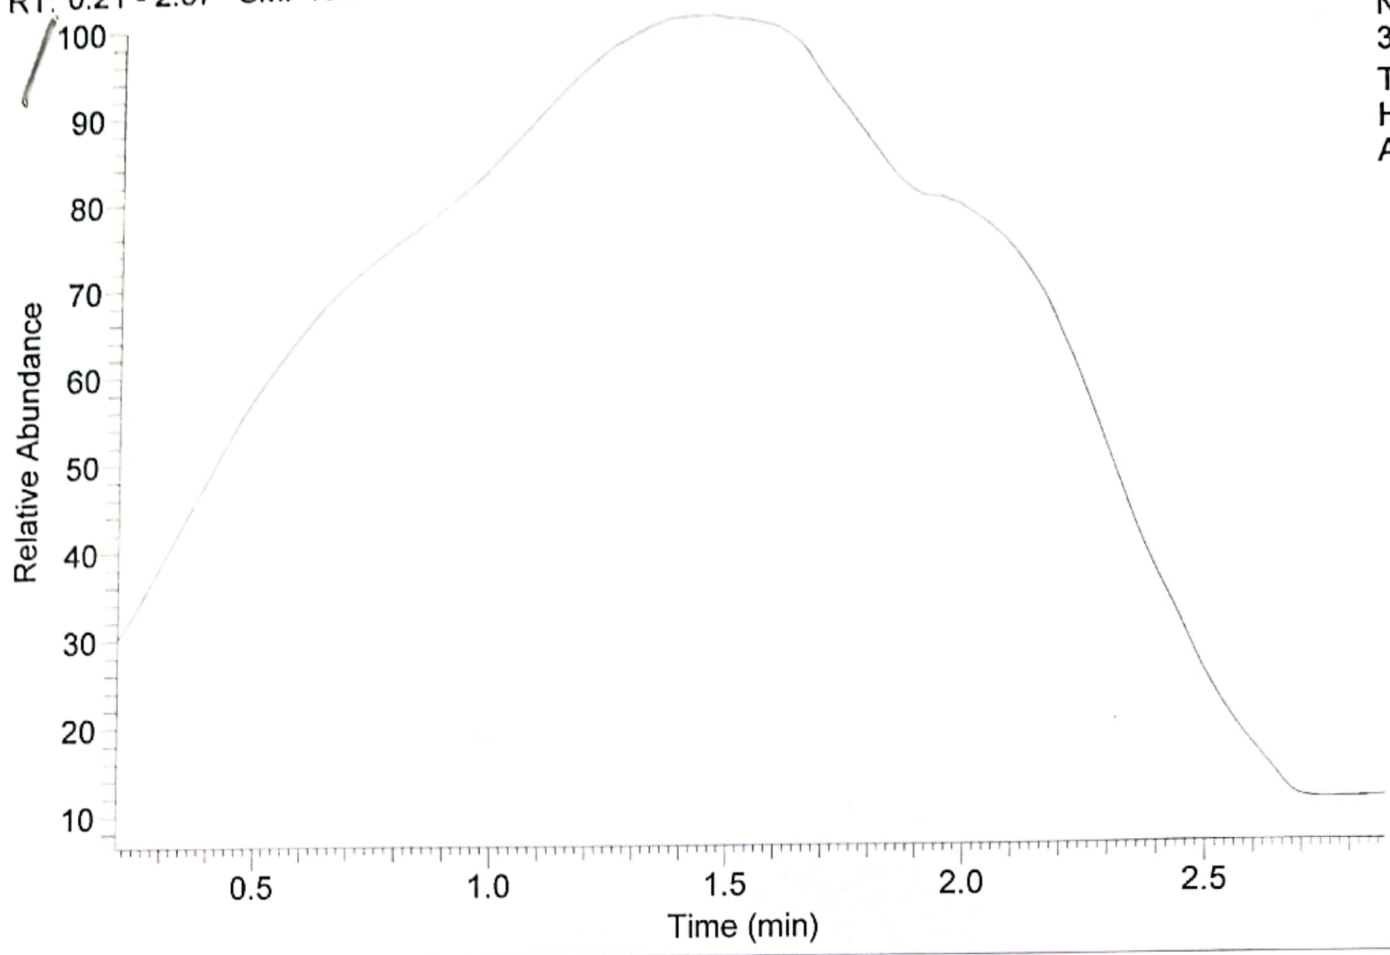

HEBA-ATEF-13A #101 RT: 1.71 AV: 1 NL: 8.89E7  
T: {0,0} + c EI Full ms [40.00-1000.00]

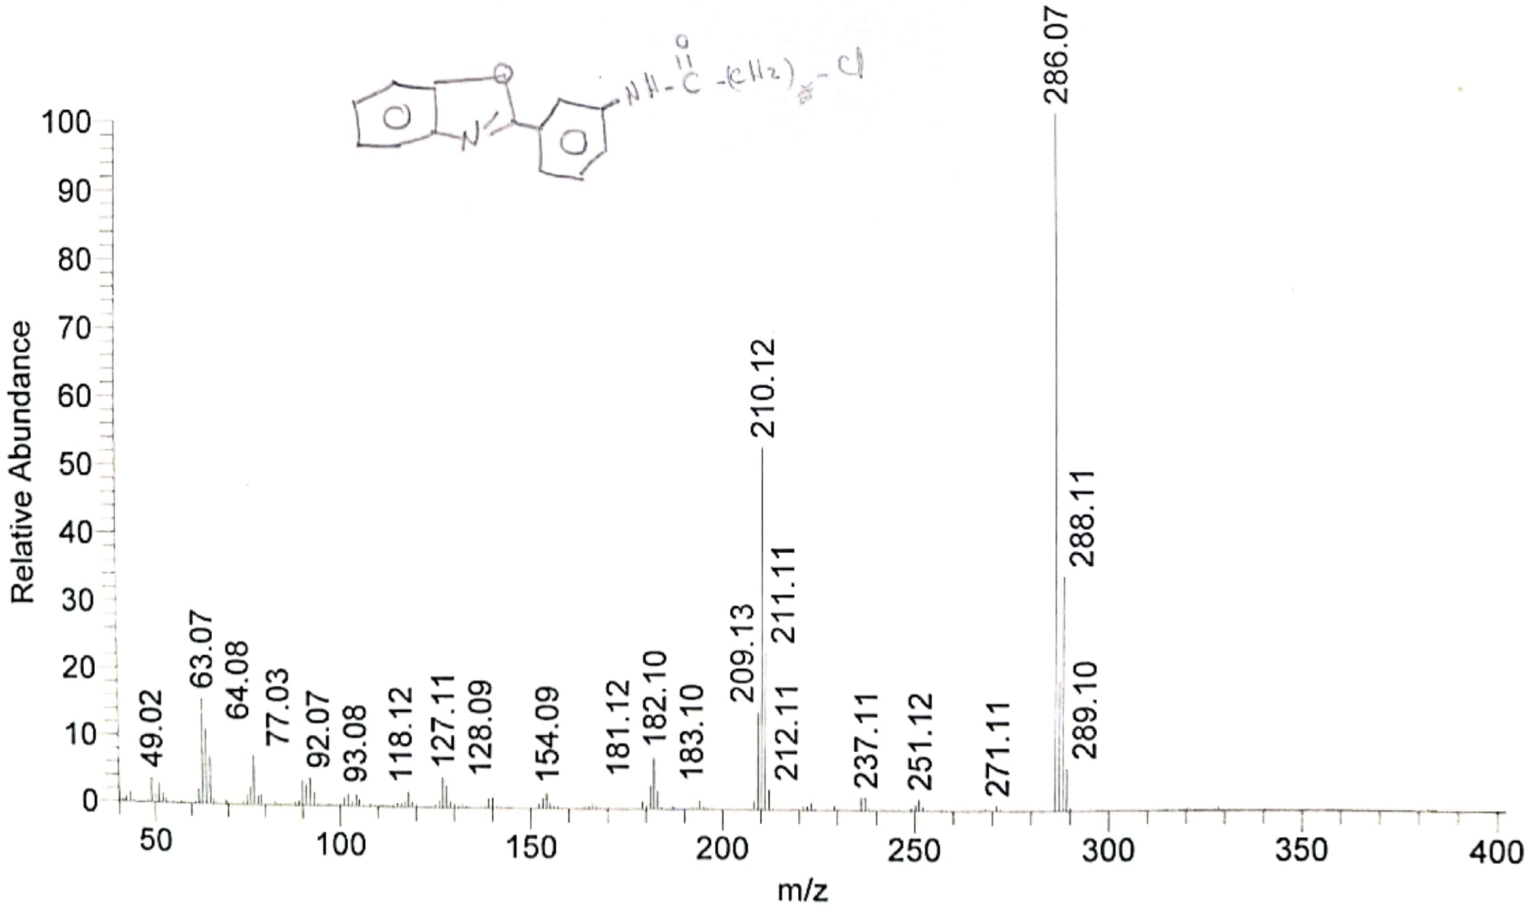

-ATEF-13A#101 RT: 1.71

(0,0) + c EI Full ms [40.00-1000.00]

z= 40.00-402.04

| m/z    | Intensity  | Relative |
|--------|------------|----------|
| 40.17  | 1131343.0  | 1.27     |
| 42.06  | 691520.3   | 0.78     |
| 43.06  | 1306507.6  | 1.47     |
| 49.02  | 3386065.5  | 3.81     |
| 50.06  | 1169314.5  | 1.31     |
| 51.04  | 2581737.3  | 2.90     |
| 52.07  | 1176987.9  | 1.32     |
| 53.08  | 665746.5   | 0.75     |
| 62.08  | 1962754.0  | 2.21     |
| 63.07  | 14034603.0 | 15.78    |
| 64.08  | 9988192.0  | 11.23    |
| 65.09  | 6282410.5  | 7.06     |
| 75.06  | 1414077.1  | 1.59     |
| 76.07  | 2323802.3  | 2.61     |
| 77.03  | 6500209.5  | 7.31     |
| 78.09  | 1165893.0  | 1.31     |
| 79.03  | 1389607.8  | 1.56     |
| 89.08  | 700555.0   | 0.79     |
| 90.08  | 3212211.8  | 3.61     |
| 91.07  | 2852849.8  | 3.21     |
| 92.07  | 3660815.3  | 4.12     |
| 93.08  | 1802245.8  | 2.03     |
| 101.08 | 1090399.0  | 1.23     |
| 102.08 | 1612141.9  | 1.81     |
| 104.21 | 1444106.6  | 1.62     |
| 104.97 | 907477.4   | 1.02     |
| 117.09 | 994217.9   | 1.12     |
| 118.12 | 1916056.1  | 2.15     |
| 119.02 | 702520.1   | 0.79     |
| 126.11 | 850203.5   | 0.96     |
| 127.11 | 3897566.5  | 4.38     |
| 128.09 | 2901539.8  | 3.26     |
| 129.09 | 842947.6   | 0.95     |
| 139.08 | 1182809.6  | 1.33     |
| 140.08 | 1261618.4  | 1.42     |
| 153.08 | 1250522.4  | 1.41     |
| 154.09 | 2105179.0  | 2.37     |
| 155.09 | 772681.4   | 0.87     |
| 166.09 | 745088.6   | 0.84     |
| 179.08 | 950514.6   | 1.07     |
| 181.12 | 2987026.8  | 3.36     |
| 182.10 | 6754416.5  | 7.59     |
| 183.10 | 2394031.0  | 2.69     |
| 194.09 | 1032675.8  | 1.16     |
| 208.11 | 1190046.6  | 1.34     |
| 209.13 | 12688930.0 | 14.27    |
| 210.12 | 46476856.0 | 52.26    |
| 211.11 | 20280990.0 | 22.80    |
| 212.11 | 2645608.8  | 2.97     |
| 223.12 | 1020521.0  | 1.15     |
| 236.08 | 1654054.3  | 1.86     |
| 237.11 | 1693832.1  | 1.90     |
| 250.14 | 759746.6   | 0.85     |
| 251.12 | 1468929.3  | 1.65     |

-ATEF-13A#101 RT: 1.71

(0,0) + c EI Full ms [40.00-1000.00]

z= 40.00-402.04

| m/z    | Intensity  | Relative |
|--------|------------|----------|
| 271.11 | 666862.8   | 0.75     |
| 286.07 | 88933672.0 | 100.00   |
| 287.11 | 16730976.0 | 18.81    |
| 288.11 | 30054792.0 | 33.79    |
| 289.10 | 5485293.5  | 6.17     |

HEBA-14A  
 PROTON\_BSU CDC13 {C:\data} nmr 6

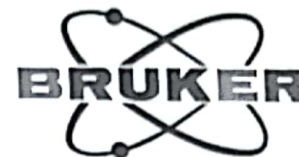

Current Data Parameters  
 NAME Apr19-2015-nmr  
 EXPNO 380  
 PROCNO 1

F2 - Acquisition Parameters  
 Date\_ 20150419  
 Time\_ 12.47  
 INSTRUM spect  
 PROBHD 5 mm PABBO BB/  
 PULPROG zg30  
 TD 65536  
 SOLVENT CDC13  
 NS 16  
 DS 2  
 SWH 8012.820 Hz  
 FIDRES 0.122266 Hz  
 AQ 4.0894465 sec  
 RG 147.93  
 DW 62.400 usec  
 DE 6.50 usec  
 TE 293.9 K  
 D1 1.00000000 sec  
 TDO 1

===== CHANNEL f1 =====  
 SFO1 400.1324710 MHz  
 NUC1 1H  
 P1 10.00 usec  
 PLW1 16.00000000 W

F2 - Processing parameters  
 SI 65536  
 SF 400.1300000 MHz  
 WDW EM  
 SSB 0  
 LB 0.10 Hz  
 GB 0  
 PC 1.00

8.830  
8.303  
8.299  
8.276  
8.248  
8.228  
7.825  
7.767  
7.746  
7.590  
7.453  
7.439  
7.416  
7.372  
7.285  
6.936  
6.919  
6.901  
6.759  
6.739  
4.391  
4.368  
4.264  
3.984  
1.593  
1.503  
1.456  
1.447  
1.309  
1.277

*cdcl + aniline*

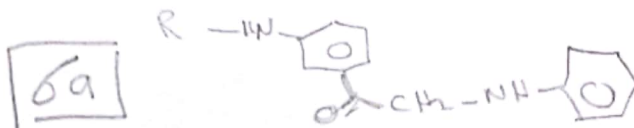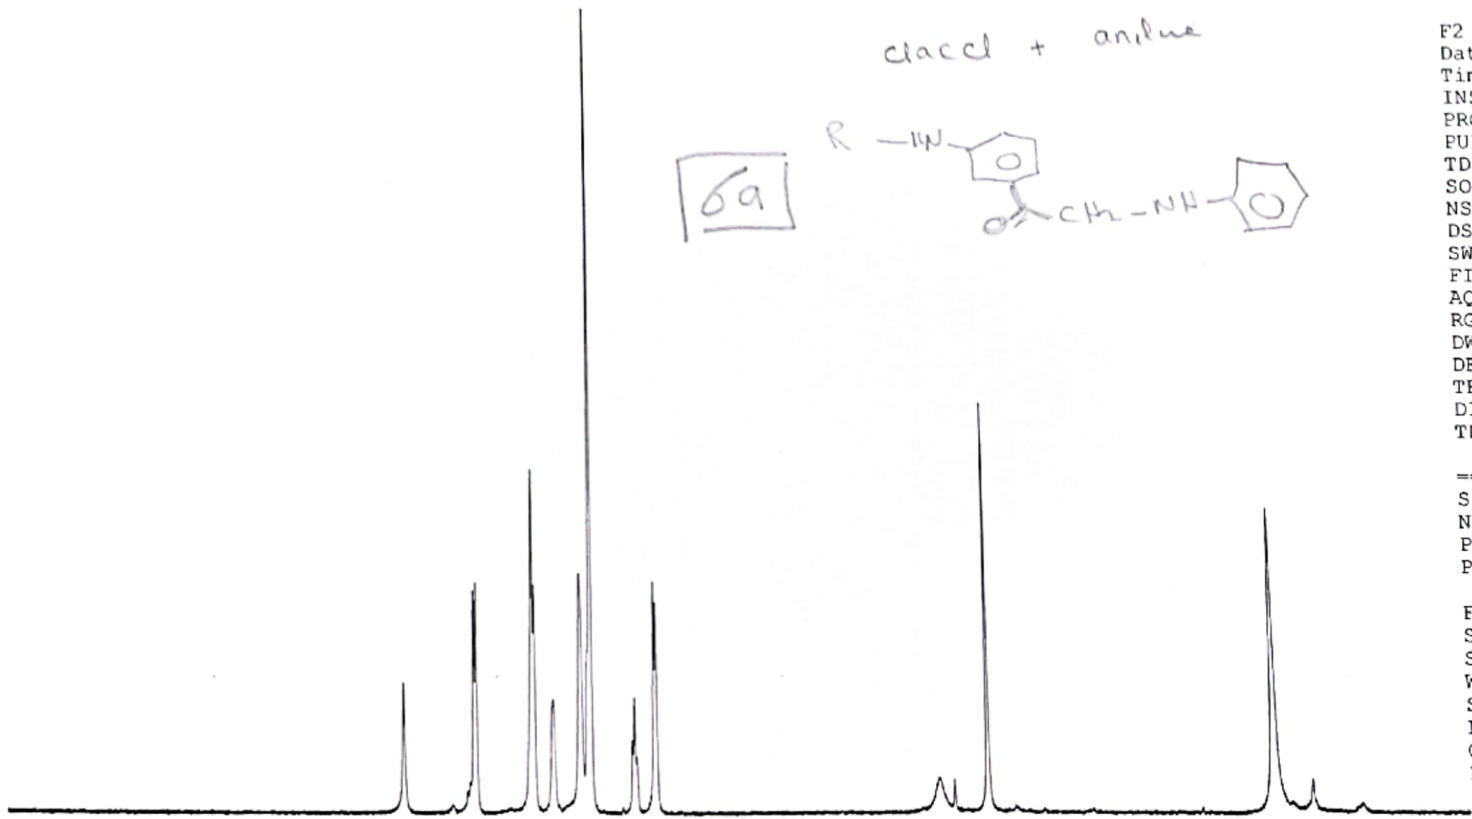

1.00  
2.32  
3.46  
1.26  
2.49  
4.65  
1.04  
2.09  
1.03  
2.12  
3.79

HEBA-14A  
 PROTON\_BSU CDC13 {C:\data} nmr 6

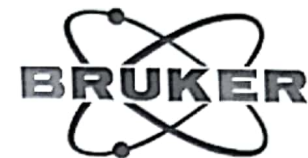

Current Data Parameters  
 NAME Apr19-2015-nmr  
 EXENO 380  
 PROCNO 1

F2 - Acquisition Parameters  
 Date\_ 20150419  
 Time\_ 12.47  
 INSTRUM spect  
 PROBHD 5 mm PABBO BB/  
 PULPROG zg30  
 TD 65536  
 SOLVENT CDC13  
 NS 16  
 DS 2  
 SWH 8012.820 Hz  
 FIDRES 0.122266 Hz  
 AQ 4.0894465 sec  
 RG 147.93  
 DW 62.400 usec  
 DE 6.50 usec  
 TE 293.9 K  
 D1 1.00000000 sec  
 TD0 1

===== CHANNEL f1 =====  
 SFO1 400.1324710 MHz  
 NUC1 1H  
 P1 10.00 usec  
 PLW1 16.00000000 W

F2 - Processing parameters  
 SI 65536  
 SF 400.1300000 MHz  
 WDW EM  
 SSB 0  
 LB 0.10 Hz  
 GB 0  
 PC 1.00

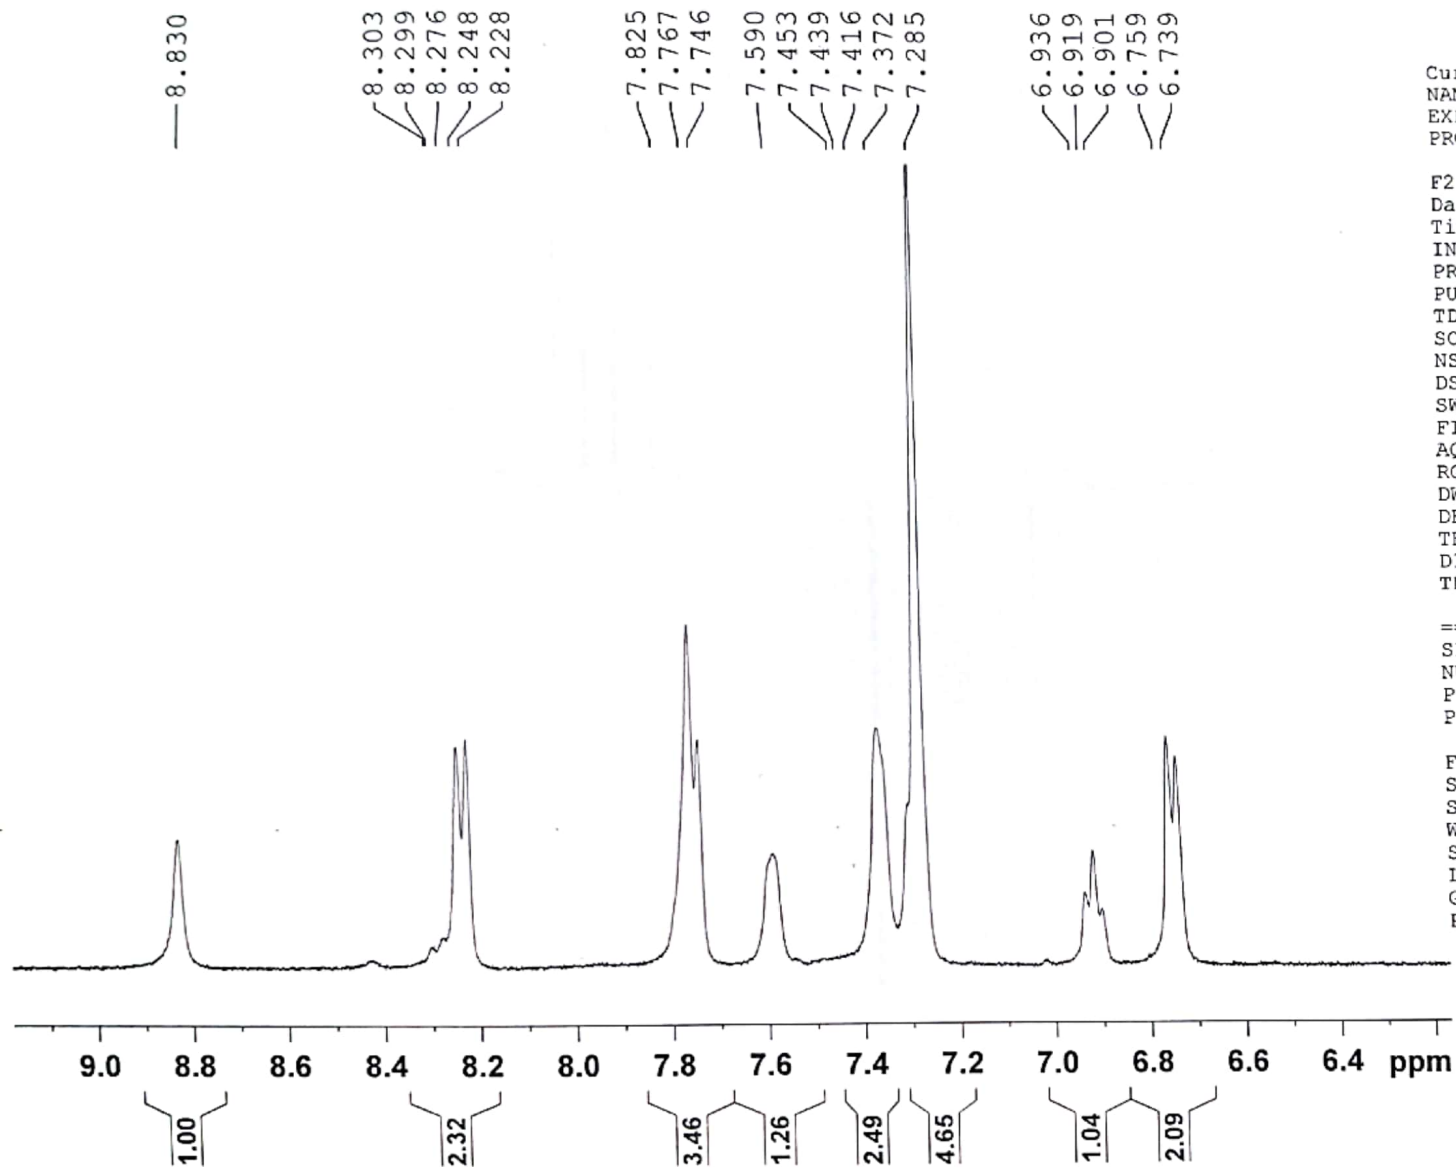

HEBA-14A  
DEPTQ-BSU CDC13 {C:\data} nmr 24

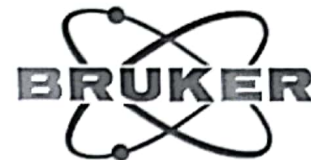

Current Data Parameters  
NAME Apr22-2015-nmr  
EXPNO 50  
PROCNO 1

F2 - Acquisition Parameters  
Date\_ 20150423  
Time 8.17  
INSTRUM spect  
PROBHD 5 mm PABBO BB/  
PULPROG deptqqpsp  
TD 65536  
SOLVENT CDC13  
NS 4000  
DS 4  
SWH 24038.461 Hz  
FIDRES 0.366798 Hz  
AQ 1.3631488 sec  
RG 205.44  
DW 20.800 usec  
DE 6.50 usec  
TE 294.7 K  
CNST2 145.0000000  
CNST12 1.5000000  
D1 2.0000000 sec  
D2 0.00344828 sec  
D12 0.00002000 sec  
D16 0.00020000 sec  
TDO 1

----- CHANNEL f1 -----  
SFO1 100.6228303 MHz  
NUC1 13C  
P1 10.00 usec  
P13 2000.00 usec  
PLW0 0 W  
PLW1 66.00000000 W  
SPNAM[5] Crp60comp.4  
SFOALS 0.500  
SPOFFS5 0 Hz  
SPW5 10.08399963 W

----- CHANNEL f2 -----  
SFO2 400.1312797 MHz  
NUC2 1H  
CPDPRG[2] waltz16  
P0 15.75 usec  
P3 10.50 usec  
P4 21.00 usec  
PCPD2 90.00 usec  
PLW2 16.00000000 W  
PLW12 0.21777999 W

----- GRADIENT CHANNEL -----  
GFNAM[1] SMSQ10.100  
GFNAM[2] SMSQ10.100  
GFNAM[3] SMSQ10.100  
GPZ1 31.00 %  
GPZ2 31.00 %  
GPZ3 31.00 %  
P16 1000.00 usec

F2 - Processing parameters  
SI 32768  
SF 100.6127690 MHz  
WDW EM  
SSB 0  
LB 1.00 Hz  
GB 0  
PC 1.40

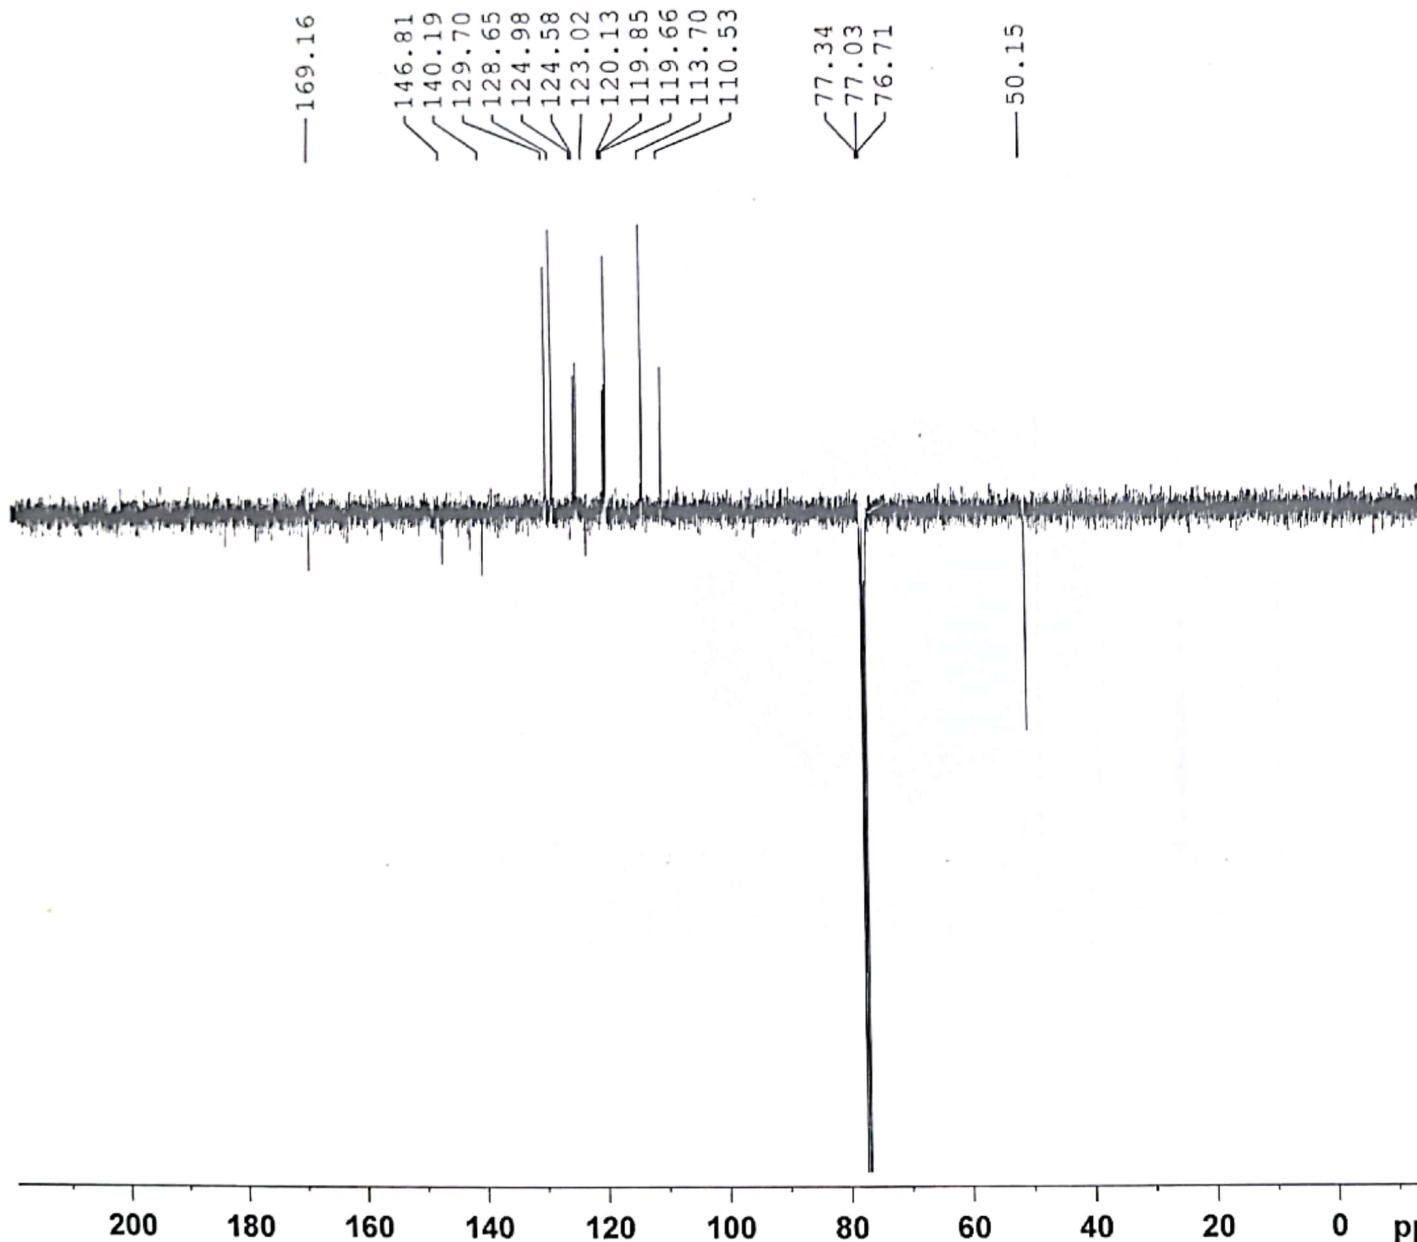

HEBA-14A  
DEPTQ-BSU CDC13 {C:\data} nmr 24

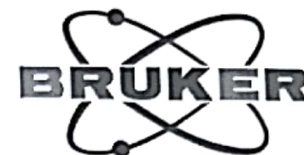

Current Data Parameters  
NAME Apr22-2015-nmr  
EXPNO 50  
PROCNO 1

F2 - Acquisition Parameters  
Date\_ 20150423  
Time 8.17  
INSTRUM spect  
PROBHD 5 mm PABBO BB/  
PULPROG deptqgppsp  
TD 65536  
SOLVENT CDC13  
NS 4000  
DS 4  
SWH 24038.461 Hz  
FIDRES 0.366798 Hz  
AQ 1.3631488 sec  
RG 205.44  
DW 20.900 usec  
DE 6.50 usec  
TE 294.7 K  
CNST2 145.0000000  
CNST12 1.5000000  
D1 2.00000000 sec  
D2 0.00344828 sec  
D12 0.00002000 sec  
D16 0.00020000 sec  
TD0 1

===== CHANNEL f1 =====  
SFO1 100.6228303 MHz  
NUC1 13C  
P1 10.00 usec  
P13 2000.00 usec  
PLW0 0 W  
PLW1 66.00000000 W  
SPNAM[5] Crp60comp.4  
SFOAL5 0.500  
SPOFFS5 0 Hz  
SPW5 10.08399963 W

===== CHANNEL f2 =====  
SFO2 400.1312797 MHz  
NUC2 1H  
CPDPRG[2] waltz16  
P0 15.75 usec  
P3 10.50 usec  
P4 21.00 usec  
PCPD2 90.00 usec  
PLW2 16.00000000 W  
PLW12 0.21777999 W

===== GRADIENT CHANNEL =====  
GPNAM[1] SMSQ10.100  
GPNAM[2] SMSQ10.100  
GPNAM[3] SMSQ10.100  
GPZ1 31.00 %  
GPZ2 31.00 %  
GPZ3 31.00 %  
P16 1000.00 usec

F2 - Processing parameters  
SI 32768  
SF 100.6127690 MHz  
WDW EM  
SSB 0  
LB 1.00 Hz  
GB 0  
PC 1.40

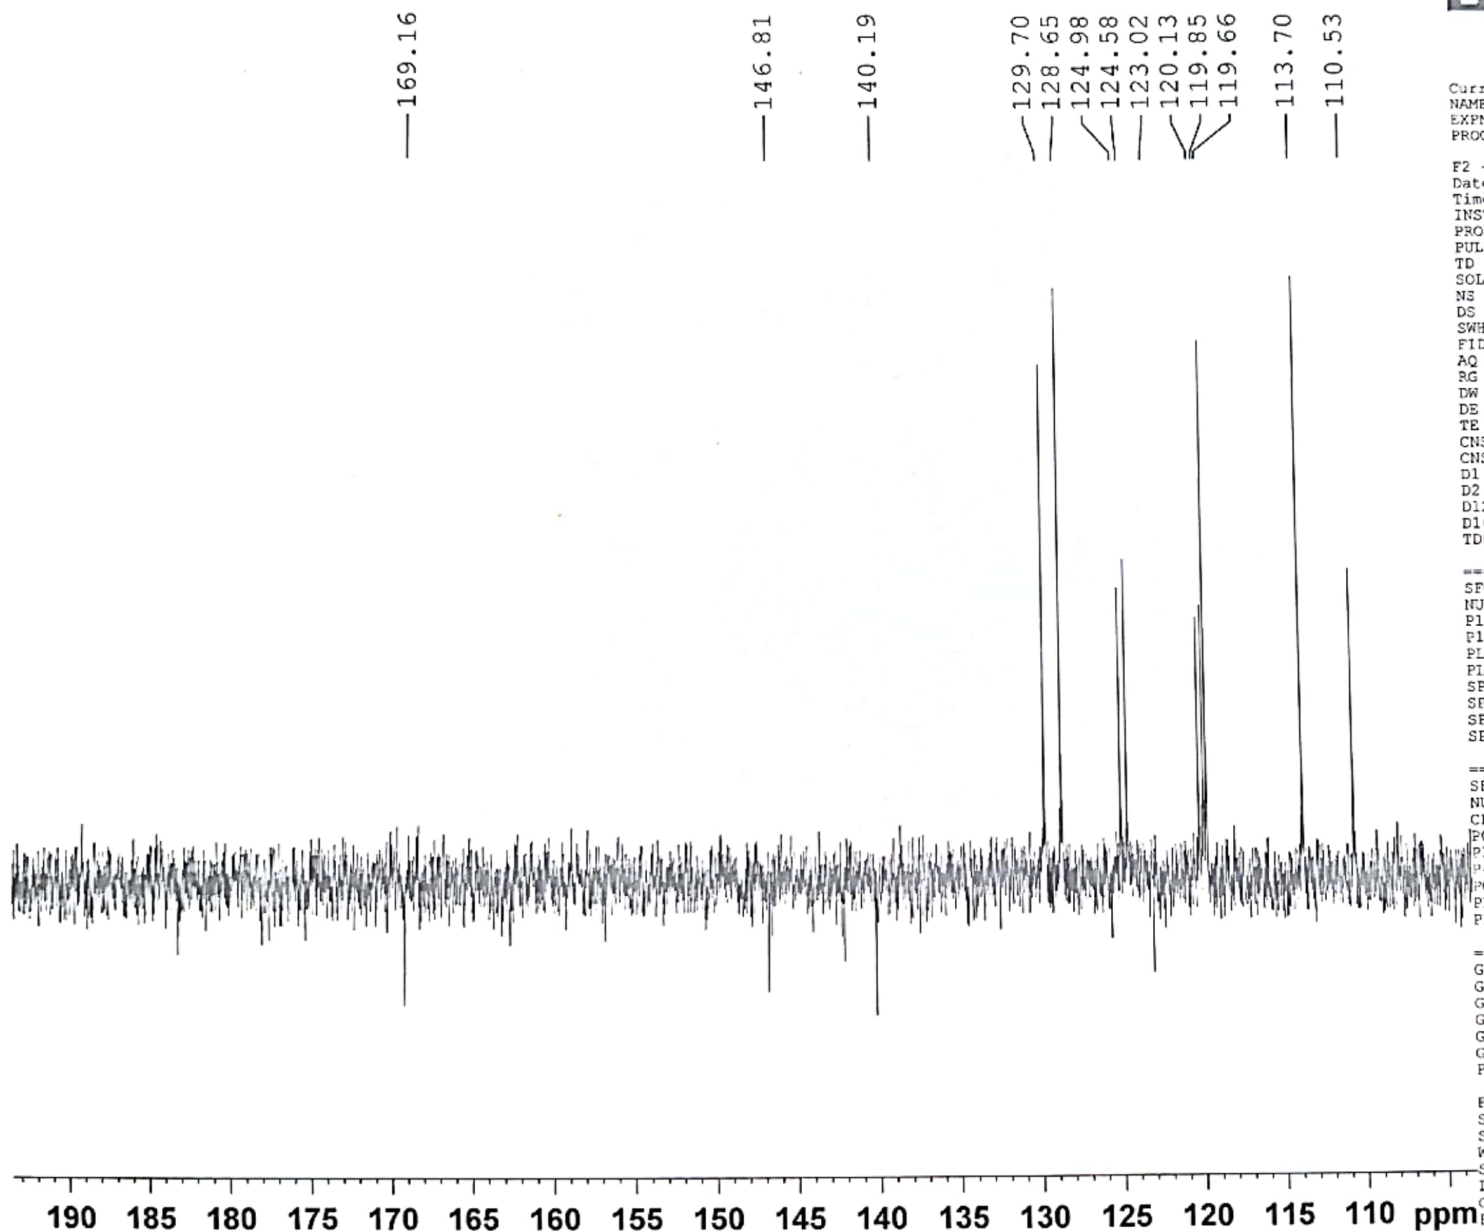



HEBA-M14  
 PROTON\_BSU CDCl3 {C:\data} nmr 20

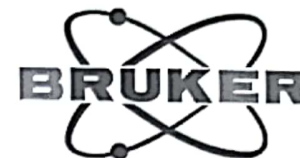

8.946  
 8.904  
 8.283  
 8.275  
 8.241  
 8.221  
 8.183  
 7.827  
 7.761  
 7.741  
 7.588  
 7.424  
 7.365  
 7.285  
 7.255  
 7.157  
 7.099  
 7.080  
 6.707  
 6.665  
 6.645

4.352  
 4.282  
 4.230  
 3.943

14b

2.293

1.717  
 1.638  
 1.277

6b

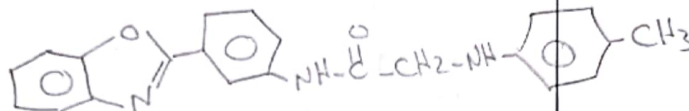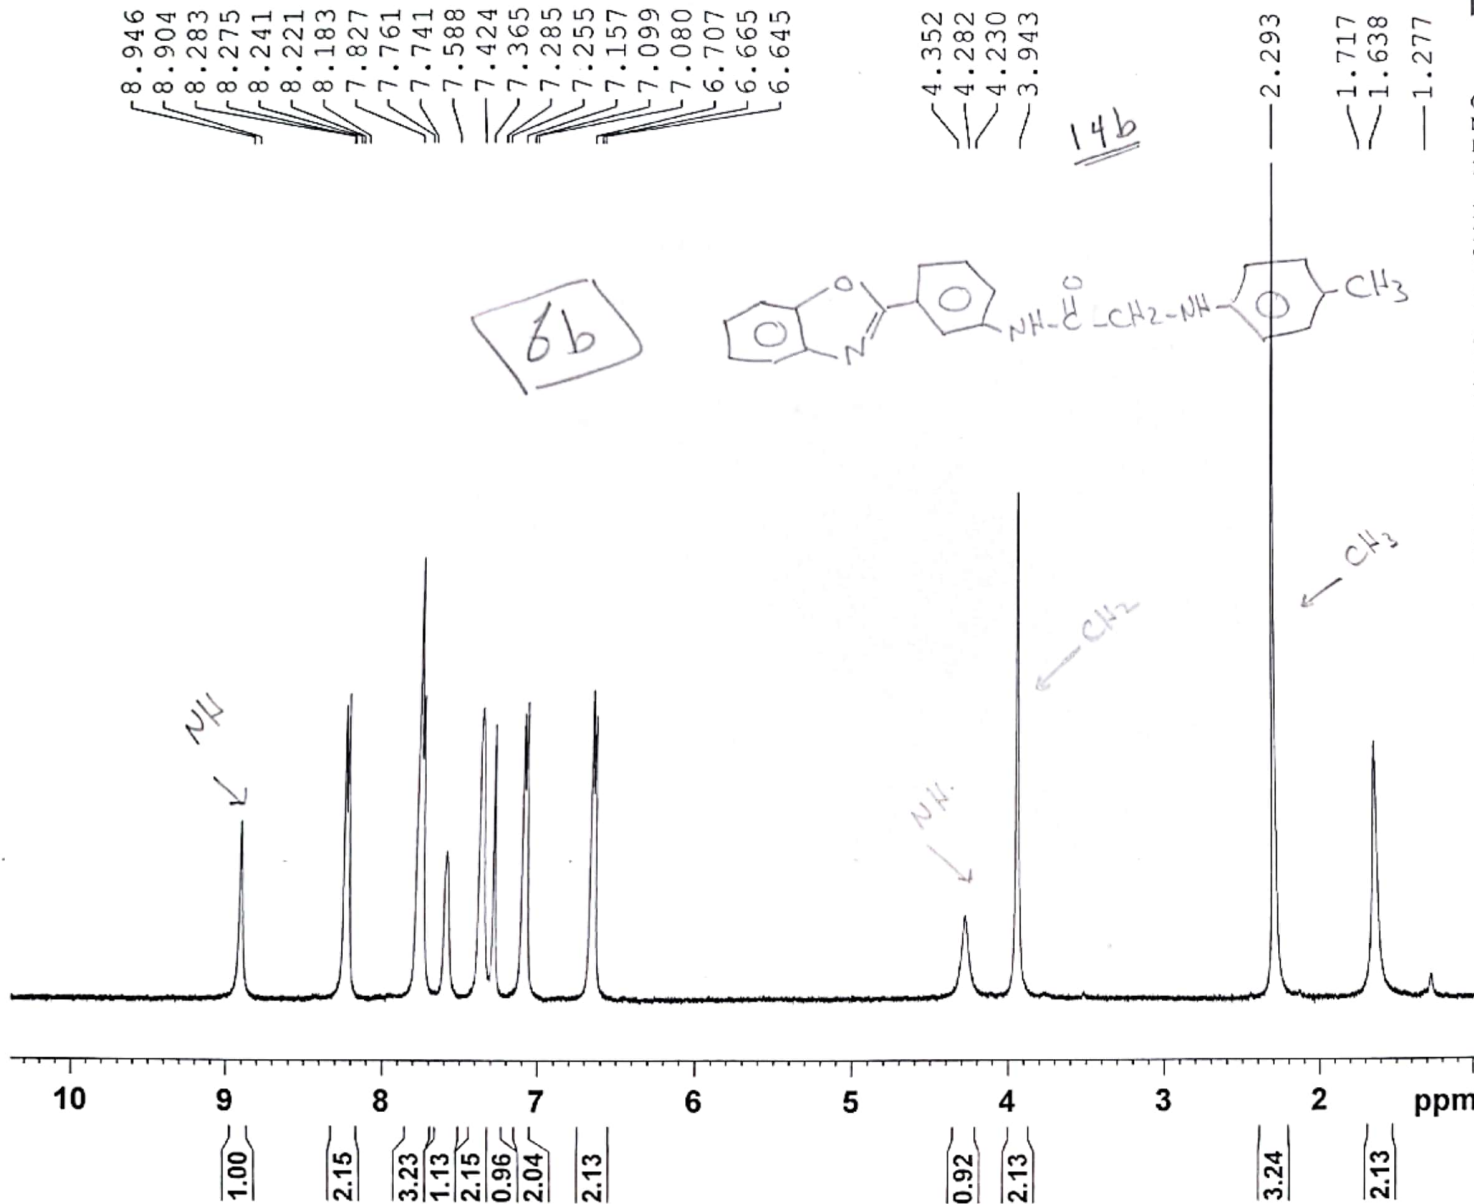

Current Data Parameters  
 NAME Mar19-2015-nmr  
 EXPNO 200  
 PROCNO 1

F2 - Acquisition Parameters  
 Date\_ 20150319  
 Time\_ 11.56  
 INSTRUM spect  
 PROBHD 5 mm PABBO BB/  
 PULPROG zg30  
 TD 65536  
 SOLVENT CDCl3  
 NS 16  
 DS 2  
 SWH 8012.820 Hz  
 FIDRES 0.122266 Hz  
 AQ 4.0894465 sec  
 RG 147.93  
 DW 62.400 usec  
 DE 6.50 usec  
 TE 293.9 K  
 D1 1.00000000 sec  
 TD0 1

===== CHANNEL f1 =====  
 SFO1 400.1324710 MHz  
 NUC1 1H  
 P1 10.00 usec  
 PLW1 16.00000000 W

F2 - Processing parameters  
 SI 65536  
 SF 400.1300000 MHz  
 WDW EM  
 SSB 0  
 LB 0.10 Hz  
 GB 0  
 PC 1.00

HEBA-M14  
DEPTQ-BSU CDC13 (C:\data) nmr 20

14b

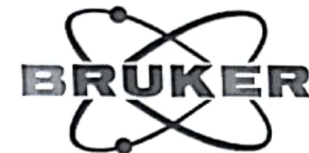

151.79  
140.08  
139.55  
130.30  
130.23  
129.63  
128.80  
128.70  
125.02  
124.61  
123.06  
121.92  
119.99  
119.87  
119.59  
119.34  
110.56

77.35  
77.03  
76.72

21.27  
20.91  
20.83

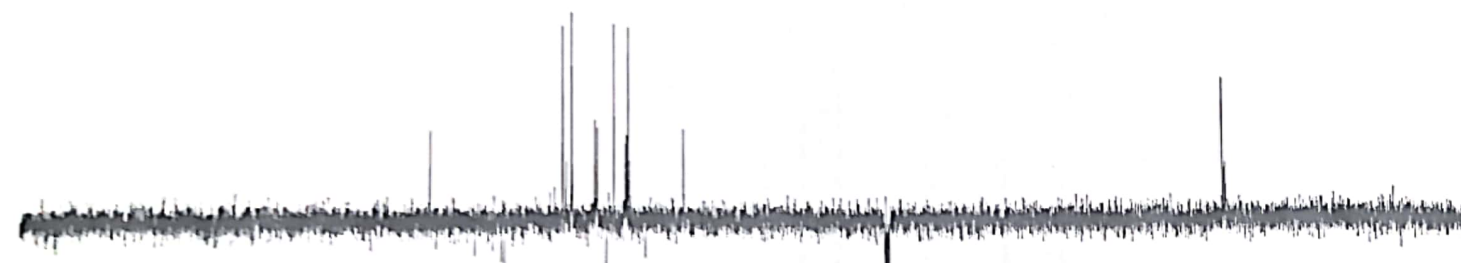

Current Data Parameters  
NAME Mar31-2015-nmr  
EXPNO 360  
PROCNO 1

F2 - Acquisition Parameters  
Date\_ 20150401  
Time 8.18  
INSTRUM spect  
PROBHD 5 mm PARBO BB/  
PULPROG deptqqpsp  
TD 65536  
SOLVENT CDC13  
NS 4000  
DS 4  
SWH 24038.461 Hz  
FIDRES 0.366798 Hz  
AQ 1.3631488 sec  
RG 205.44  
DW 20.800 usec  
DE 6.50 usec  
TE 294.6 K  
CNST2 145.0000000  
CNST12 1.5000000  
D1 2.00000000 sec  
D2 0.00344828 sec  
D12 0.00002000 sec  
D16 0.00002000 sec  
TDO 1

===== CHANNEL f1 =====  
SFO1 100.6228303 MHz  
NUC1 13C  
P1 10.00 usec  
P13 2000.00 usec  
PLW0 0 W  
PLW1 66.00000000 W  
SPNAM[5] Crp60comp.4  
SFOAL5 0.500  
SPOFFS5 0 Hz  
SEW5 10.08399963 W

===== CHANNEL f2 =====  
SFO2 400.1312797 MHz  
NUC2 1H  
CPDPRG[2] waltz16  
P0 15.75 usec  
P3 10.50 usec  
P4 21.00 usec  
FCPD2 90.00 usec  
PLW2 16.00000000 W  
PLW12 0.21777999 W

===== GRADIENT CHANNEL =====  
GFNAM[1] SMSQ10.100  
GFNAM[2] SMSQ10.100  
GFNAM[3] SMSQ10.100  
GP21 31.00 %  
GP22 31.00 %  
GP23 31.00 %  
P16 1000.00 usec

F2 - Processing parameters  
SI 32768  
SF 100.6127690 MHz  
WDW EM  
SSP 0  
LB 1.00 Hz  
GB 0  
PC 1.40

200 180 160 140 120 100 80 60 40 20 0 ppm

HEBA-M14  
DEPTQ-BSU CDC13 {C:\data} nmr 20

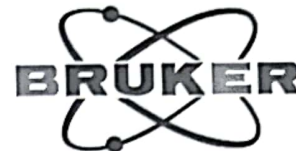

Current Data Parameters  
NAME Mar31-2015-nmr  
EXPNO 360  
PROCNO 1

F2 - Acquisition Parameters  
Date\_ 20150401  
Time\_ 8.18  
INSTRUM spect  
PROBHD 5 mm PABBO BB/  
PULPROG deptqqpap  
TD 65536  
SOLVENT CDC13  
NS 4000  
DS 4  
SWH 24038.461 Hz  
FIDRES 0.366798 Hz  
AQ 1.3631488 sec  
RG 205.44  
DW 20.800 usec  
DE 6.50 usec  
TE 294.6 K  
CNST2 145.0000000  
CNST12 1.5000000  
D1 2.00000000 sec  
D2 0.00344828 sec  
D12 0.00002000 sec  
D16 0.00020000 sec  
TD0 1

----- CHANNEL f1 -----  
SF01 100.6228303 MHz  
NUC1 13C  
P1 10.00 usec  
P13 2000.00 usec  
PLW0 0 W  
PLW1 66.00000000 W  
SPNAM[5] Crp60comp.4  
SPOAL5 0.500  
SPOFFS5 0 Hz  
SPW5 10.08399963 W

----- CHANNEL f2 -----  
SF02 400.1312797 MHz  
NUC2 1H  
CPDPRG[2] waltz16  
P0 15.75 usec  
P3 10.50 usec  
P4 21.00 usec  
PCPD2 90.00 usec  
PLW2 16.00000000 W  
PLW12 0.21777999 W

----- GRADIENT CHANNEL -----  
GPNAM[1] SMSQ10.100  
GPNAM[2] SMSQ10.100  
GPNAM[3] SMSQ10.100  
GP21 31.00 %  
GP22 31.00 %  
GP23 31.00 %  
P16 1000.00 usec

F2 - Processing parameters  
SI 32768  
SF 100.6127690 MHz  
WDM EM  
SSB 0  
LB 1.00 Hz  
GB 0  
PC 1.40

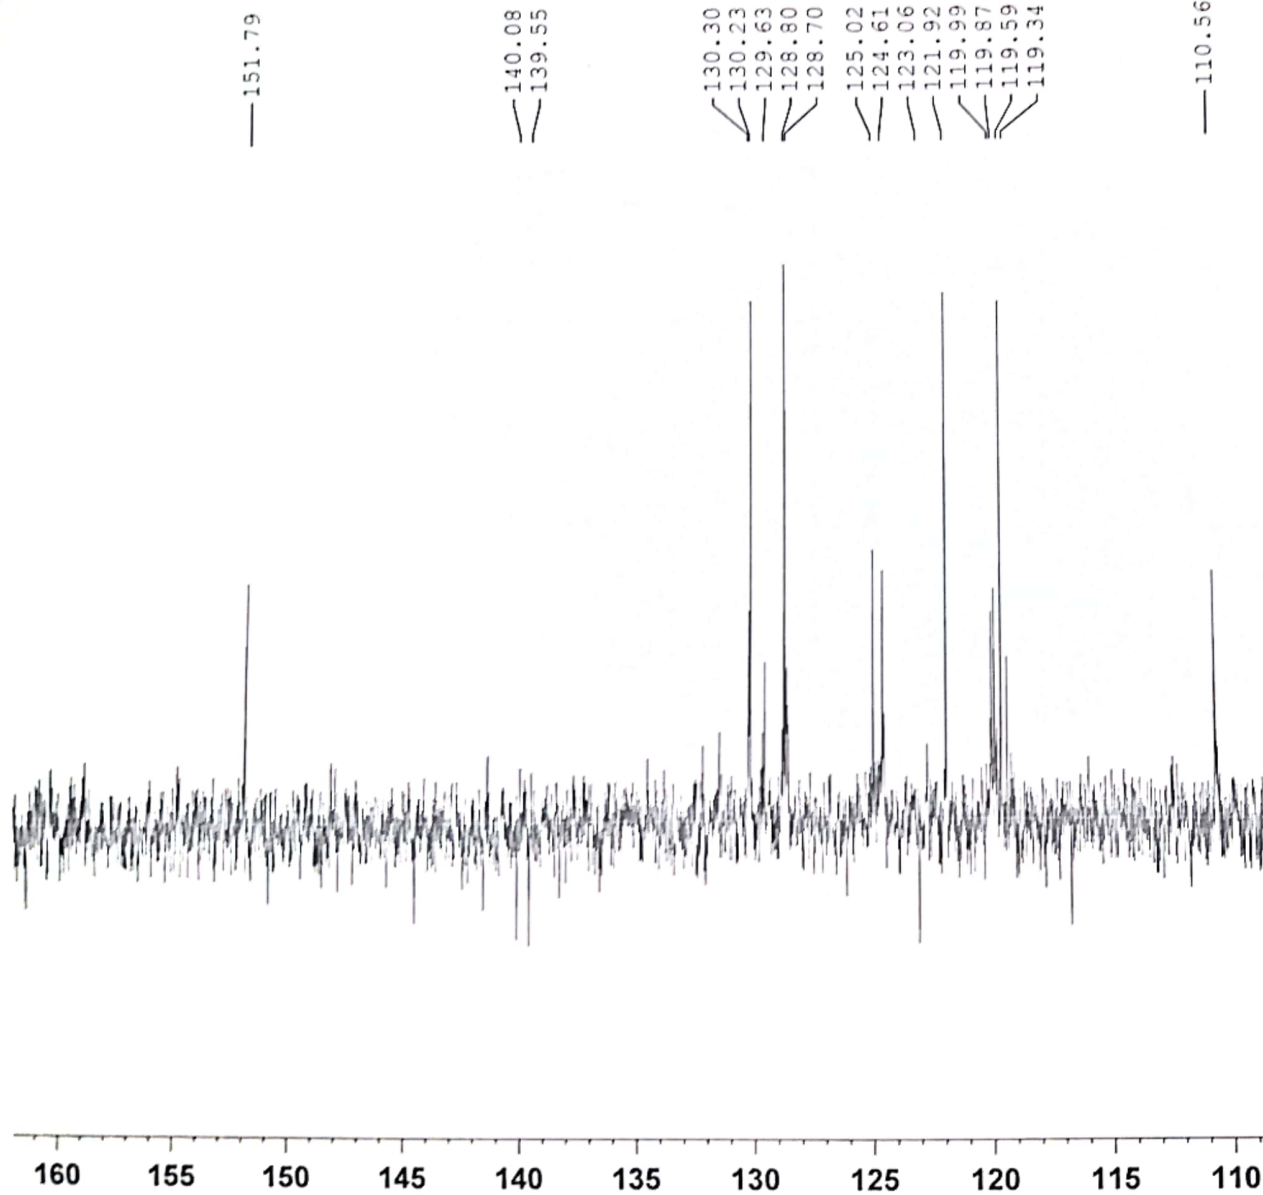

HEBA-14D  
PROTON\_BSU DMSO (C:\data) nmr 8

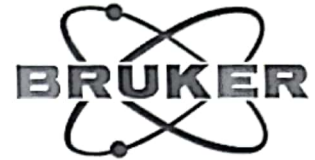

Current Data Parameters  
NAME Jul15-2015-nmr  
EXPNO 240  
PROCNO 1

F2 - Acquisition Parameters  
Date\_ 20150718  
Time\_ 7.44  
INSTRUM spect  
PROBHD 5 mm PABBO BB/  
PULPROG zg30  
TD 65536  
SOLVENT DMSO  
NS 16  
DS 2  
SWH 8012.820 Hz  
FIDRES 0.122266 Hz  
AQ 4.0894465 sec  
RG 147.93  
DW 62.400 usec  
DE 6.50 usec  
TE 298.1 K  
D1 1.00000000 sec  
TD0 1

===== CHANNEL f1 =====  
SFO1 400.1324710 MHz  
NUC1 1H  
P1 10.00 usec  
PLW1 16.00000000 W

F2 - Processing parameters  
SI 65536  
SF 400.1300000 MHz  
WDW EM  
SSB 0  
LB 0.10 Hz  
GB 0  
PC 1.00

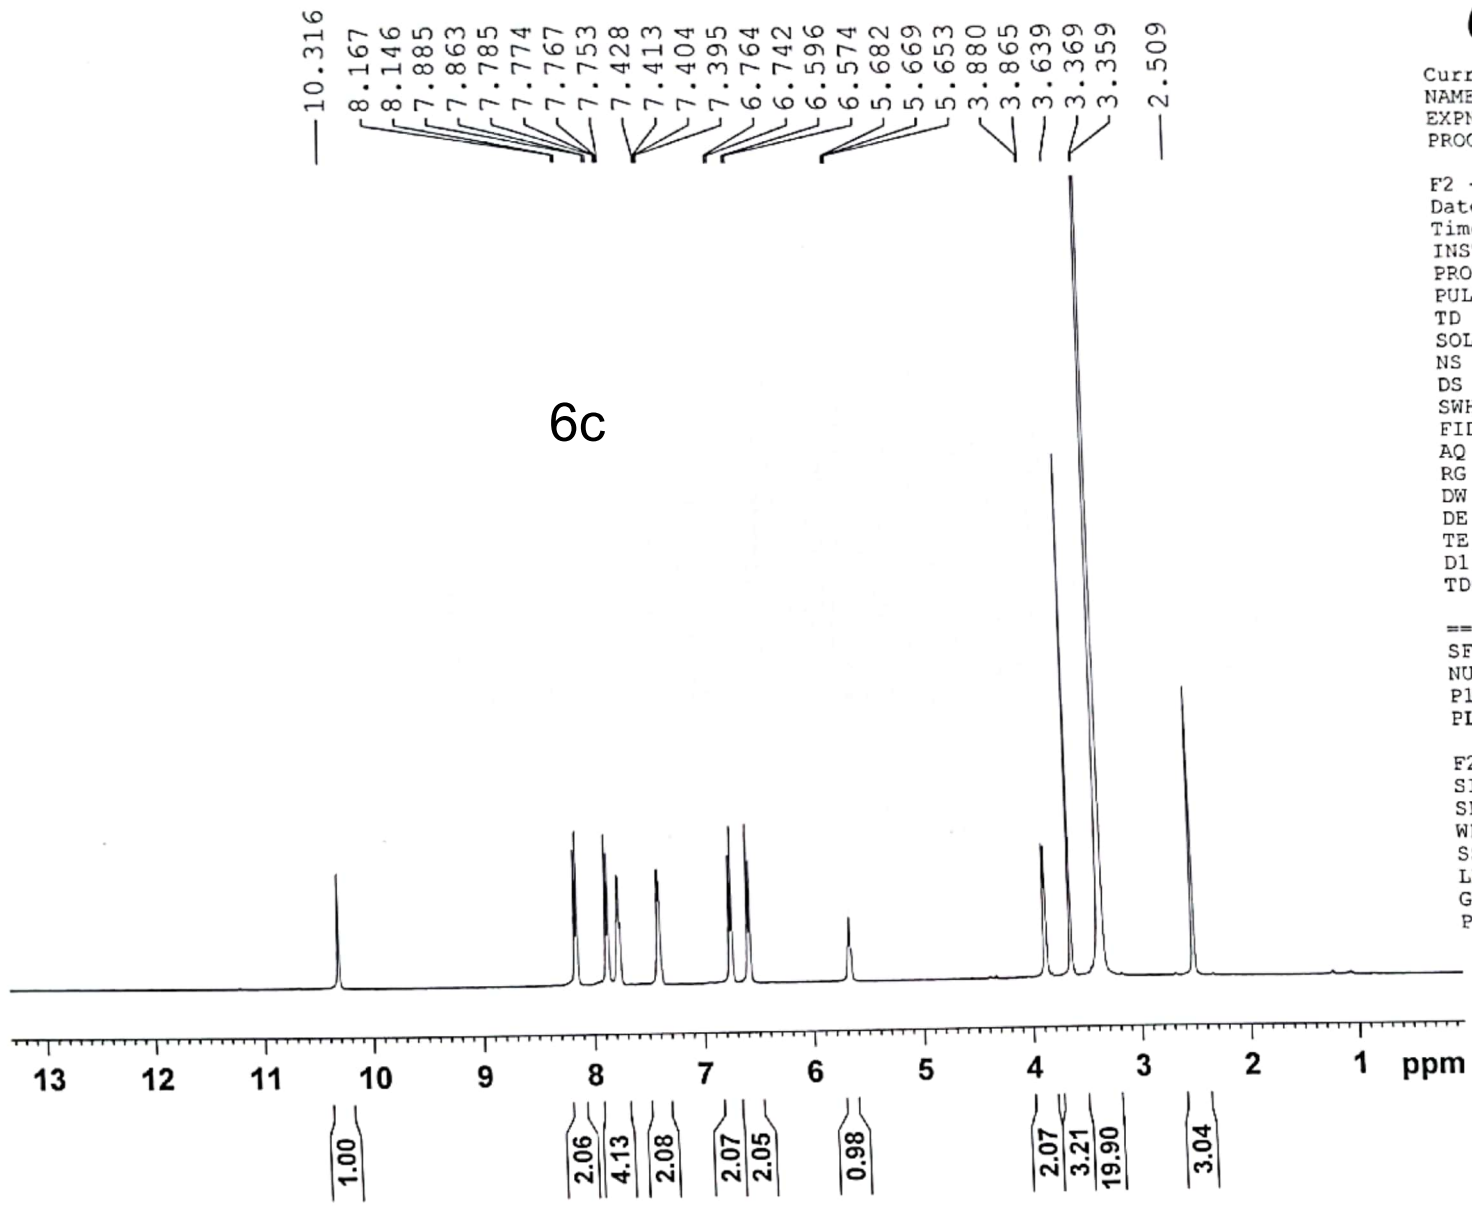

HEBA-14D  
PROTON\_BSU DMSO {C:\data} nmr 8

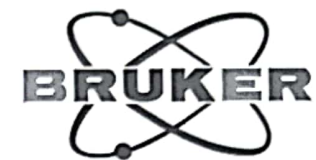

8.167  
8.146  
7.885  
7.863  
7.785  
7.774  
7.767  
7.753  
7.428  
7.413  
7.404  
7.395

6.764  
6.742  
6.596  
6.574

5.682  
5.669  
5.653

Current Data Parameters  
NAME Jul15-2015-nmr  
EXPNO 240  
PROCNO 1

F2 - Acquisition Parameters  
Date\_ 20150718  
Time\_ 7.44  
INSTRUM spect  
PROBHD 5 mm PABBO BB/  
PULPROG zg30  
TD 65536  
SOLVENT DMSO  
NS 16  
DS 2  
SWH 8012.820 Hz  
FIDRES 0.122266 Hz  
AQ 4.0894465 sec  
RG 147.93  
DW 62.400 usec  
DE 6.50 usec  
TE 298.1 K  
D1 1.00000000 sec  
TD0 1

===== CHANNEL f1 =====  
SFO1 400.1324710 MHz  
NUC1 1H  
P1 10.00 usec  
PLW1 16.00000000 W

F2 - Processing parameters  
SI 65536  
SF 400.1300000 MHz  
WDW EM  
SSB 0  
LB 0.10 Hz  
GB 0  
PC 1.00

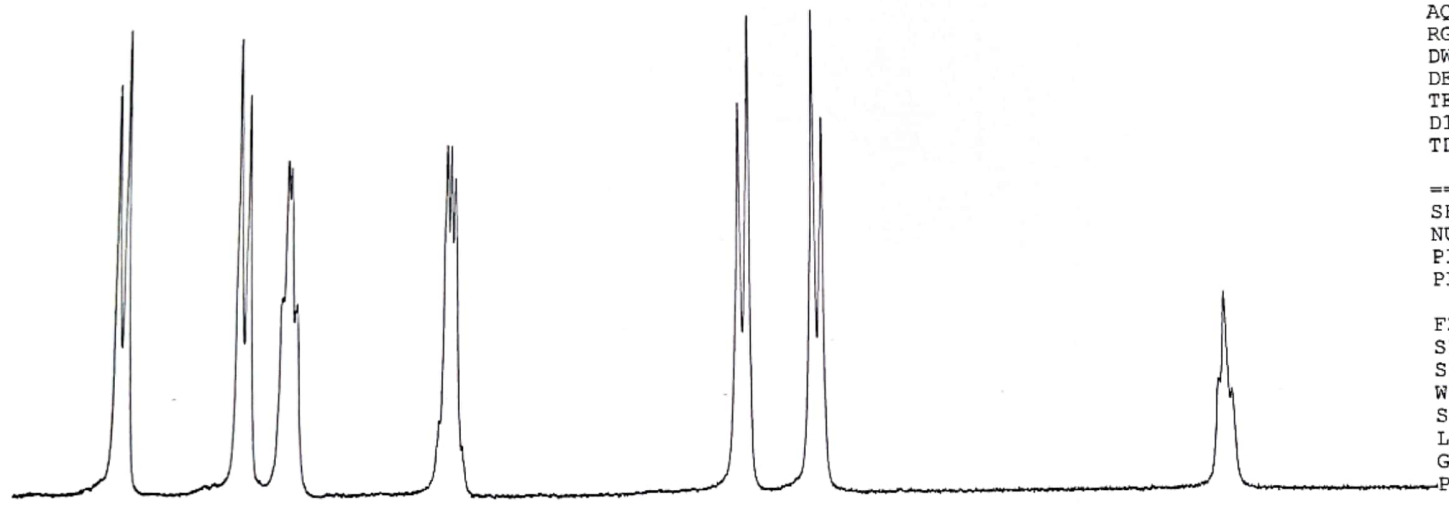

2.06

4.13

2.08

2.07

2.05

0.98

HEBA-14D  
DEPTQ-BSU DMSO {C:\data} nmr 8

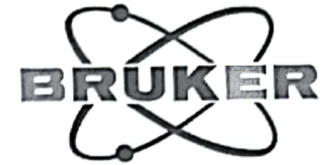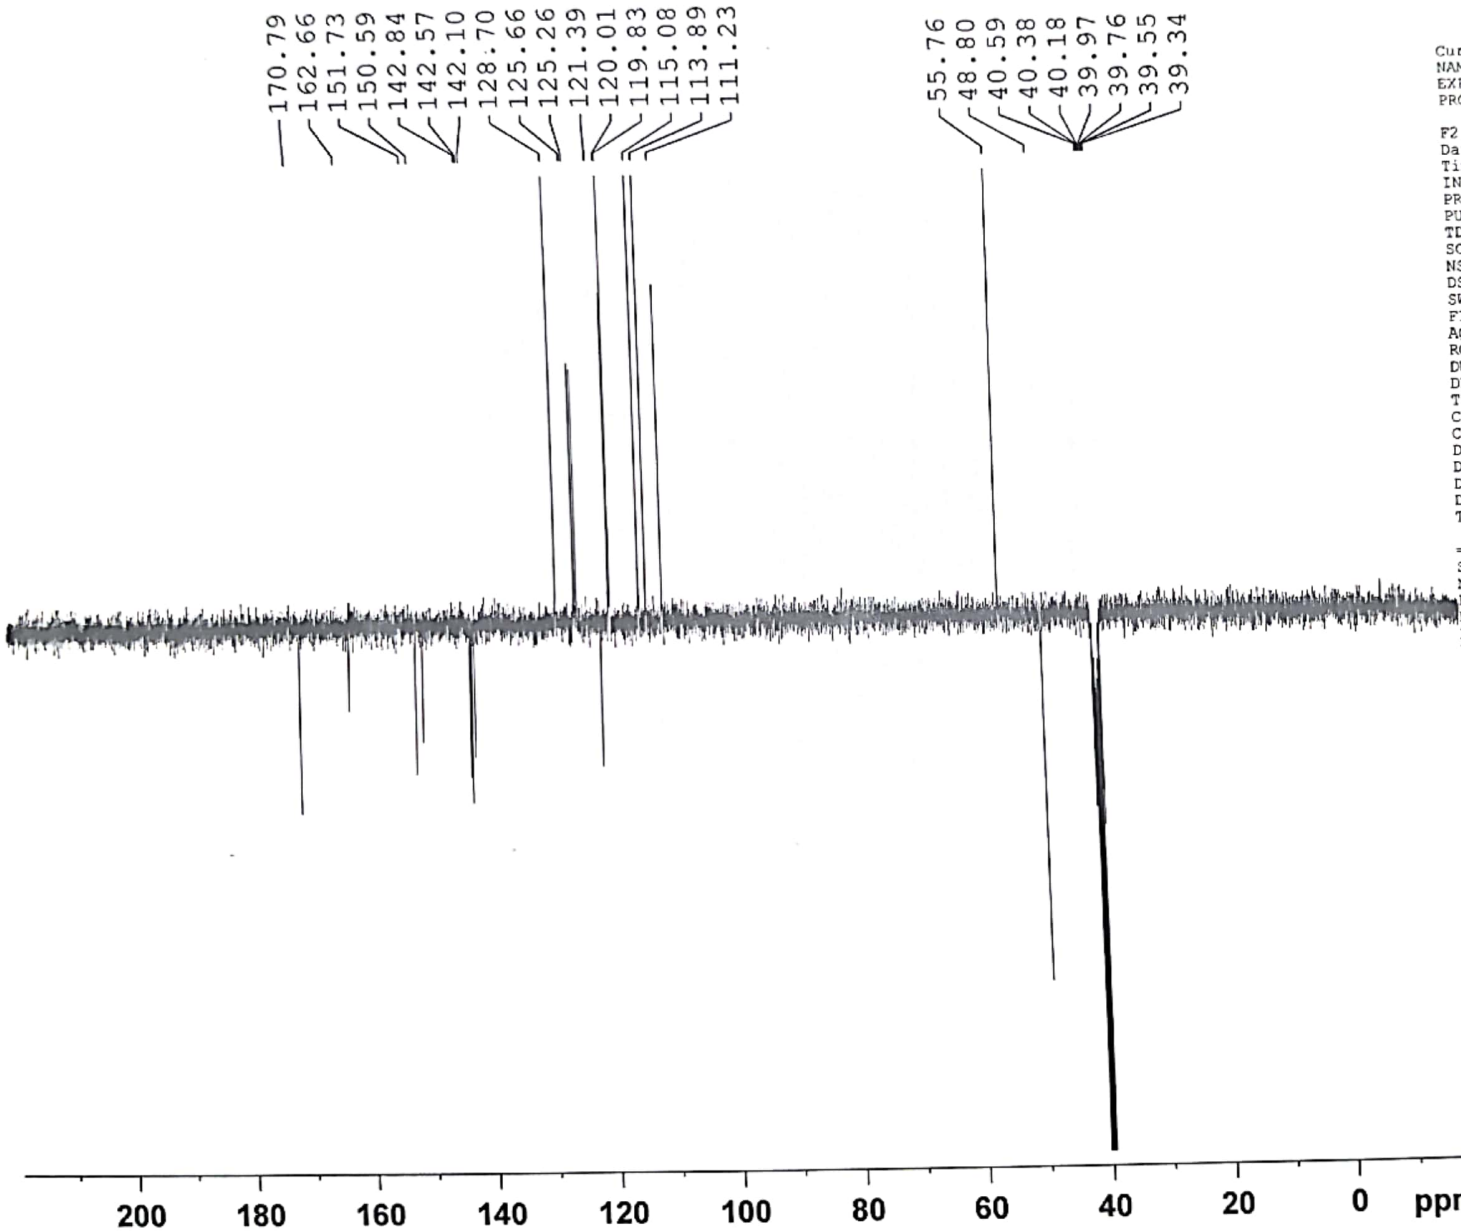

Current Data Parameters  
NAME Jul15-2015-nmr  
EXPNO 241  
PROCNO 1

F2 - Acquisition Parameters  
Date 20150718  
Time 11.33  
INSTRUM spect  
PROBHD 5 mm PABBO EB/  
PULPROG deptqqesp  
TD 65536  
SOLVENT DMSO  
NS 4000  
DS 4  
SWH 24038.461 Hz  
FIDRES 0.366798 Hz  
AQ 1.3631488 sec  
RG 205.44  
DW 20.800 usec  
DE 6.50 usec  
TE 298.4 K  
CNST2 145.0000000  
CNST12 1.5000000  
D1 2.00000000 sec  
D2 0.00344828 sec  
D12 0.00002000 sec  
D16 0.00020000 sec  
TD0 1

==== CHANNEL f1 =====  
SFO1 100.6228303 MHz  
NUC1 13C  
P1 10.00 usec  
P13 2000.00 usec  
PLW0 0 W  
PLW1 66.00000000 W  
SFNAM[5] Crp60comp.4  
SFOAL5 0.500  
SPOFFS5 0 Hz  
SPW5 10.08399963 W

==== CHANNEL f2 =====  
SFO2 400.1312797 MHz  
NUC2 1H  
CPDPRG[2] waltz16  
P0 15.75 usec  
P3 10.50 usec  
P4 21.00 usec  
PCPD2 90.00 usec  
PLW2 16.00000000 W  
PLW12 0.21777999 W

==== GRADIENT CHANNEL =====  
GPNAM[1] SMSQ10.100  
GPNAM[2] SMSQ10.100  
GPNAM[3] SMSQ10.100  
GPZ1 31.00 %  
GPZ2 31.00 %  
GPZ3 31.00 %  
P16 1000.00 usec

F2 - Processing parameters  
SI 32768  
SF 100.6127690 MHz  
WDW EM  
SSB 0  
LB 1.00 Hz  
GB 0  
PC 1.40

HEBA-14D  
DEPTQ-BSU DMSO {C:\data} nmr 8

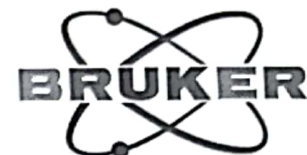

Current Data Parameters  
NAME Jul15-2015-nmr  
EXPNO 241  
PROCNO 1

F2 - Acquisition Parameters  
Date 20150718  
Time 11.33  
INSTRUM spect  
PROBHD 5 mm FAPBO BB/  
PULPROG deptqqpsp  
TD 65536  
SOLVENT DMSO  
NS 4000  
DS 4  
SWH 24038.461 Hz  
FIDRES 0.366798 Hz  
AQ 1.3631488 sec  
RG 205.44  
DW 20.800 usec  
DE 6.50 usec  
TE 298.4 K  
CNST2 145.0000000  
CNST12 1.5000000  
D1 2.0000000 sec  
D2 0.00344828 sec  
D12 0.0002000 sec  
D16 0.0002000 sec  
TD0 1

===== CHANNEL f1 =====  
SFO1 100.6228303 MHz  
NUC1 13C  
P1 10.00 usec  
P13 2000.00 usec  
PLW0 0 W  
PLW1 66.00000000 W  
SPNAM(5) Crp60comp.4  
SFOALS 0.500  
SPOFFS5 0 Hz  
SPW5 10.08399963 W

===== CHANNEL f2 =====  
SFO2 400.1312797 MHz  
NUC2 1H  
CPDPRG(2) waltz16  
P0 15.75 usec  
P3 10.50 usec  
P4 21.00 usec  
PCPD2 90.00 usec  
PLW2 16.00000000 W  
PLW12 0.21777999 W

===== GRADIENT CHANNEL =====  
GPNAM(1) SMSQ10.100  
GPNAM(2) SMSQ10.100  
GPNAM(3) SMSQ10.100  
GPZ1 31.00 %  
GPZ2 31.00 %  
GPZ3 31.00 %  
P16 1000.00 usec

F2 - Processing parameters  
SI 32768  
SF 100.6127690 MHz  
WDW EM  
SSB 0  
LB 1.00 Hz  
GB 0  
PC 1.40

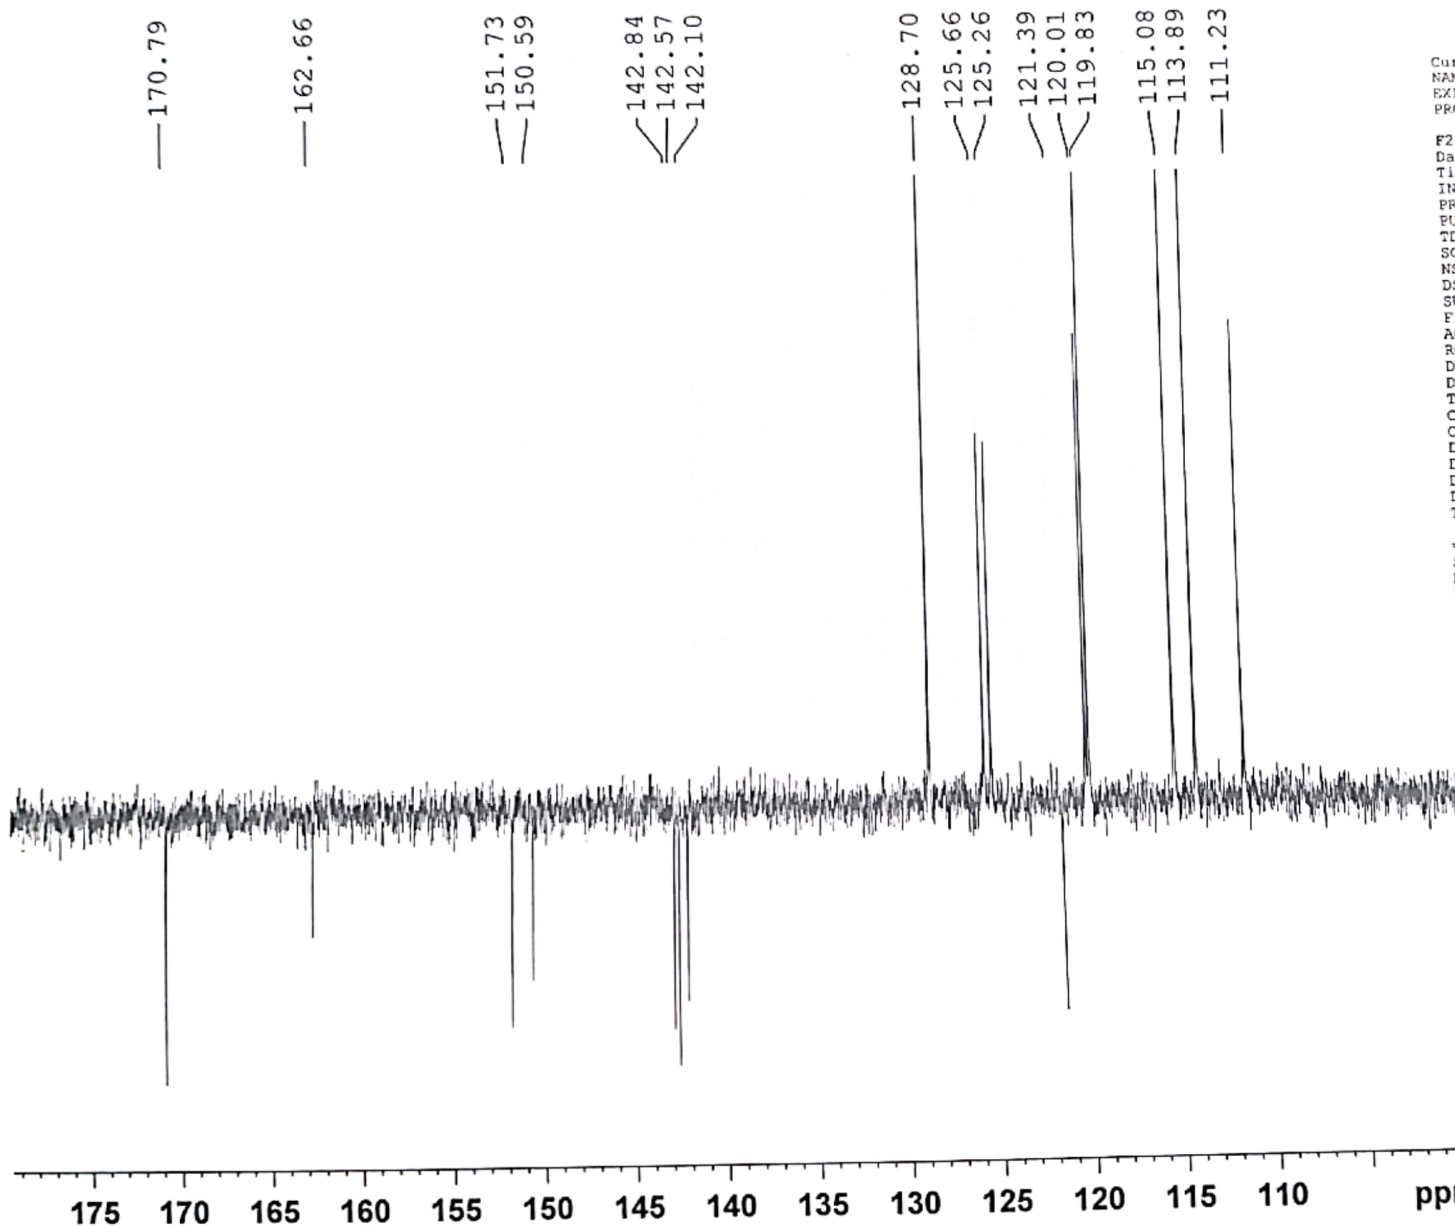

HEBA-14D  
DEPTQ-BSU DMSO (C:\data) nmr 8

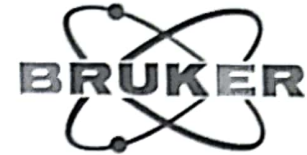

Current Data Parameters  
NAME Jul15-2015-nmr  
EXPNO 241  
PROCNO 1

F2 - Acquisition Parameters  
Date\_ 20150718  
Time\_ 11.33  
INSTRUM spect  
PROBHD 5 mm PABBO BB/  
PULPROG deptsqpp  
TD 65536  
SOLVENT DMSO  
NS 4000  
DS 4  
SWH 24039.461 Hz  
FIDRES 0.366798 Hz  
AQ 1.3631488 sec  
RG 205.44  
EW 20.800 usec  
DE 6.50 usec  
TE 298.4 K  
CNST2 145.0000000  
CNST12 1.5000000  
D1 2.0000000 sec  
D2 0.00344825 sec  
D12 0.00002000 sec  
D16 0.00020000 sec  
TD0 1

----- CHANNEL f1 -----  
SFO1 100.6228903 MHz  
NUC1 13C  
P1 10.00 usec  
P13 2000.00 usec  
PLW0 0 W  
PLW1 66.00000000 W  
SPNAM[5] Crp40comp.4  
SFOALS 0.500  
SFOFFS5 0 Hz  
SPW5 10.08399963 W

----- CHANNEL f2 -----  
SFO2 400.1312797 MHz  
NUC2 1H  
CPOPRG[2] waltz16  
P0 15.75 usec  
P3 10.50 usec  
P4 21.00 usec  
PCPD2 90.00 usec  
PLW2 16.00000000 W  
PLW12 0.21777999 W

----- GRADIENT CHANNEL -----  
GPNAM[1] SMSQ10.100  
GPNAM[2] SMSQ10.100  
GPNAM[3] SMSQ10.100  
GP21 31.00 %  
GP22 31.00 %  
GP23 31.00 %  
P16 1000.00 usec

F2 - Processing parameters  
SI 32768  
SF 100.6127690 MHz  
WDW EM  
SSB 0  
LB 1.00 Hz  
GB 0  
PC 1.40

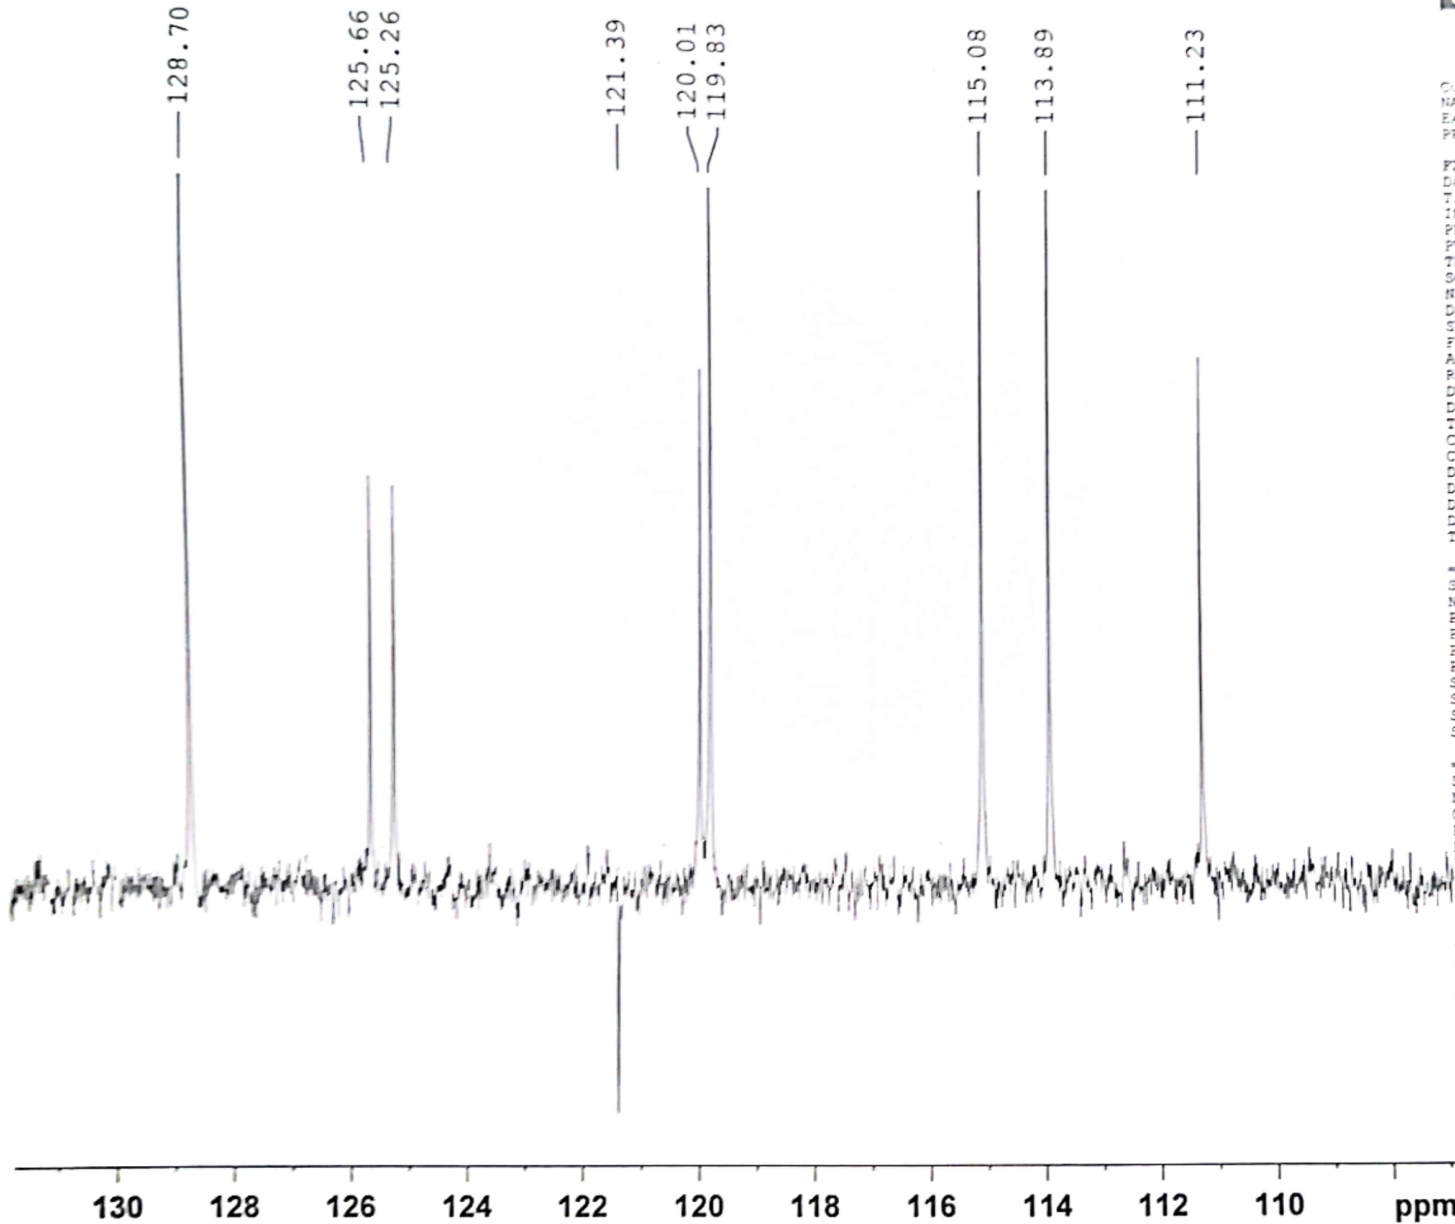



HEBA-14D  
DEPTQ-BSU DMSO {C:\data} nmr 8

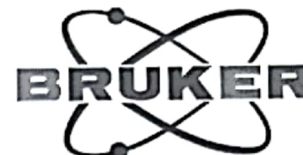

— 170.79

— 162.66

— 151.73

— 150.59

142.84  
142.57  
142.10

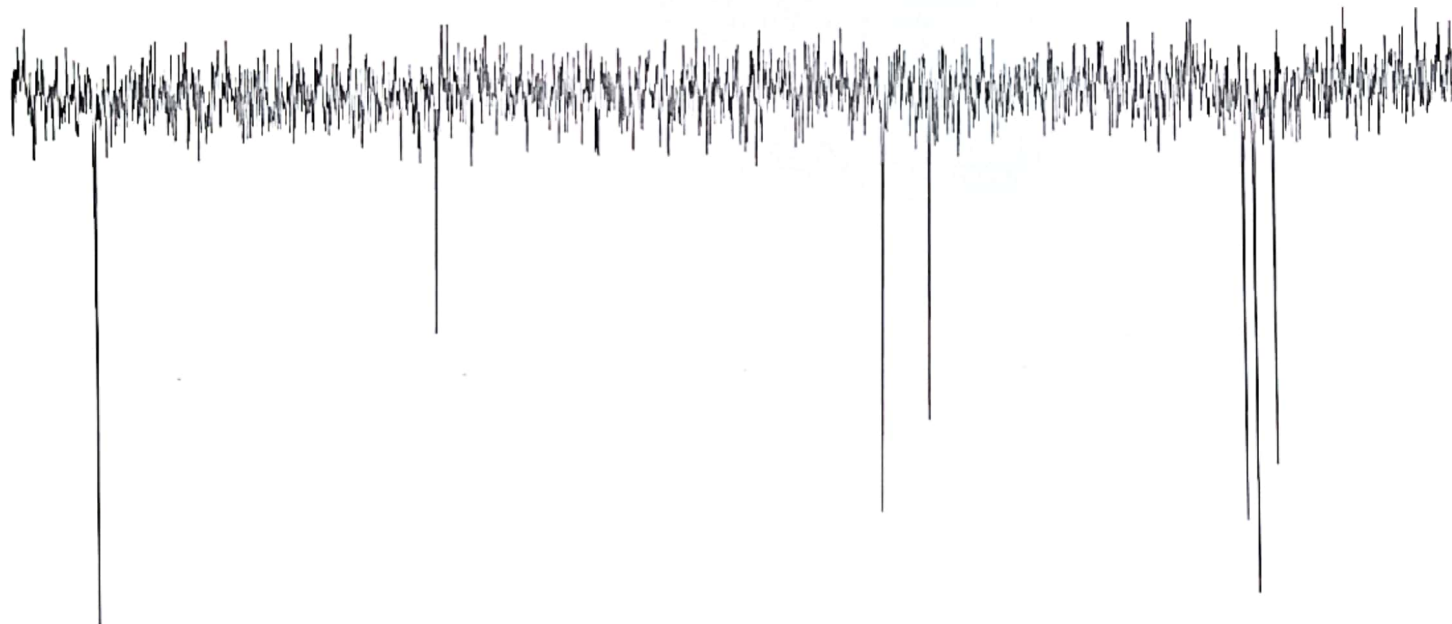

Current Data Parameters  
NAME Jul15-2015-nmr  
EXPNO 241  
PROCNO 1

F2 - Acquisition Parameters  
Date\_ 20150718  
Time\_ 11.33  
INSTRUM spect  
PROBHD 5 mm BABB0 BB/  
PULPROG deptqqppp  
TD 65536  
SOLVENT DMSO  
NS 4000  
DS 4  
SWH 24038.461 Hz  
FIDRES 0.366798 Hz  
AQ 1.3631488 sec  
RG 205.44  
DW 20.800 usec  
DE 6.50 usec  
TE 298.4 K  
CNST2 145.0000000  
CNST12 1.5000000  
D1 2.00000000 sec  
D2 0.00344828 sec  
D12 0.00002000 sec  
D16 0.00020000 sec  
TD0 1

===== CHANNEL f1 =====  
SFO1 100.6228303 MHz  
NUC1 13C  
P1 10.00 usec  
P13 2000.00 usec  
PLW0 0 W  
PLW1 66.00000000 W  
SPNAM[5] Crp60comp.4  
SFOAL5 0.500  
SPOFFS5 0 Hz  
SEW5 10.08399963 W

===== CHANNEL f2 =====  
SFO2 400.1312797 MHz  
NUC2 1H  
CEDPRG[2] waltz16  
P0 15.75 usec  
P3 10.50 usec  
P4 21.00 usec  
PCPD2 90.00 usec  
PLW2 16.00000000 W  
PLW12 0.21777999 W

===== GRADIENT CHANNEL =====  
GENAM[1] SMSQ10.100  
GENAM[2] SMSQ10.100  
GENAM[3] SMSQ10.100  
GPZ1 31.00  $\mu$   
GPZ2 31.00  $\mu$   
GPZ3 31.00  $\mu$   
P16 1000.00 usec

F2 - Processing parameters  
SI 32768  
SF 100.6127690 MHz  
WDW EM  
SSB 0  
LB 1.00 Hz  
GB 0  
PC 1.40

HEBA-14C  
 PROTON\_BSU DMSO {C:\data} nmr 9

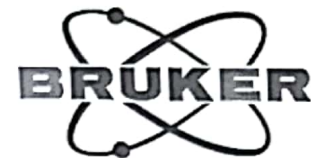

Current Data Parameters  
 NAME May03-2015-nmr  
 EXPNO 330  
 PROCNO 1

F2 - Acquisition Parameters  
 Date\_ 20150503  
 Time 13.11  
 INSTRUM spect  
 PROBHD 5 mm PABBO BB/  
 PULPROG zg30  
 TD 65536  
 SOLVENT DMSO  
 NS 16  
 DS 2  
 SWH 8012.820 Hz  
 FIDRES 0.122266 Hz  
 AQ 4.0894465 sec  
 RG 147.93  
 DW 62.400 usec  
 DE 6.50 usec  
 TE 294.0 K  
 D1 1.00000000 sec  
 TD0 1

==== CHANNEL f1 =====  
 SFO1 400.1324710 MHz  
 NUC1 1H  
 P1 10.00 usec  
 PLW1 16.00000000 W

F2 - Processing parameters  
 SI 65536  
 SF 400.1300000 MHz  
 WDW EM  
 SSB 0  
 LB 0.10 Hz  
 GB 0  
 PC 1.00

— 10.431  
 8.173  
 8.152  
 7.877  
 7.857  
 7.789  
 7.779  
 7.770  
 7.414  
 7.405  
 7.396  
 7.142  
 7.121  
 6.633  
 6.612  
 6.290  
 4.336  
 3.950  
 3.936  
 3.361  
 — 2.508

$\delta d$

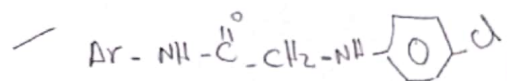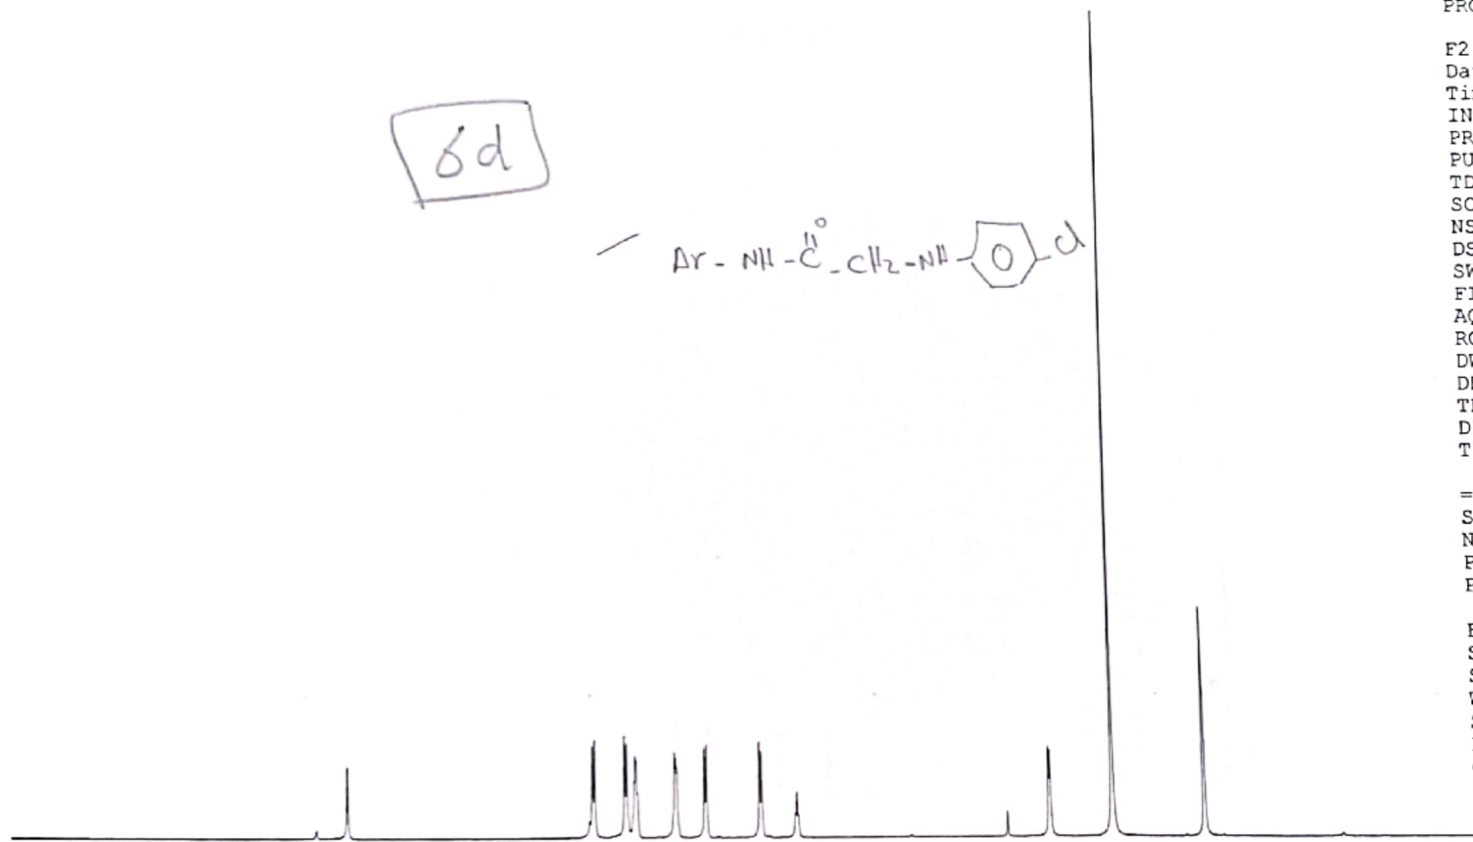

13 12 11 10 9 8 7 6 5 4 3 2 1 ppm

3.26  
 7.88  
 7.69  
 7.34  
 7.66  
 6.53  
 6.58  
 3.13  
 0.80  
 6.50  
 27.08  
 12.28

HEBA-14C  
PROTON\_BSU DMSO {C:\data} nmr 7

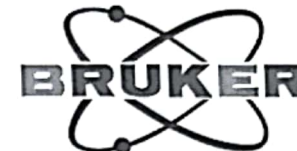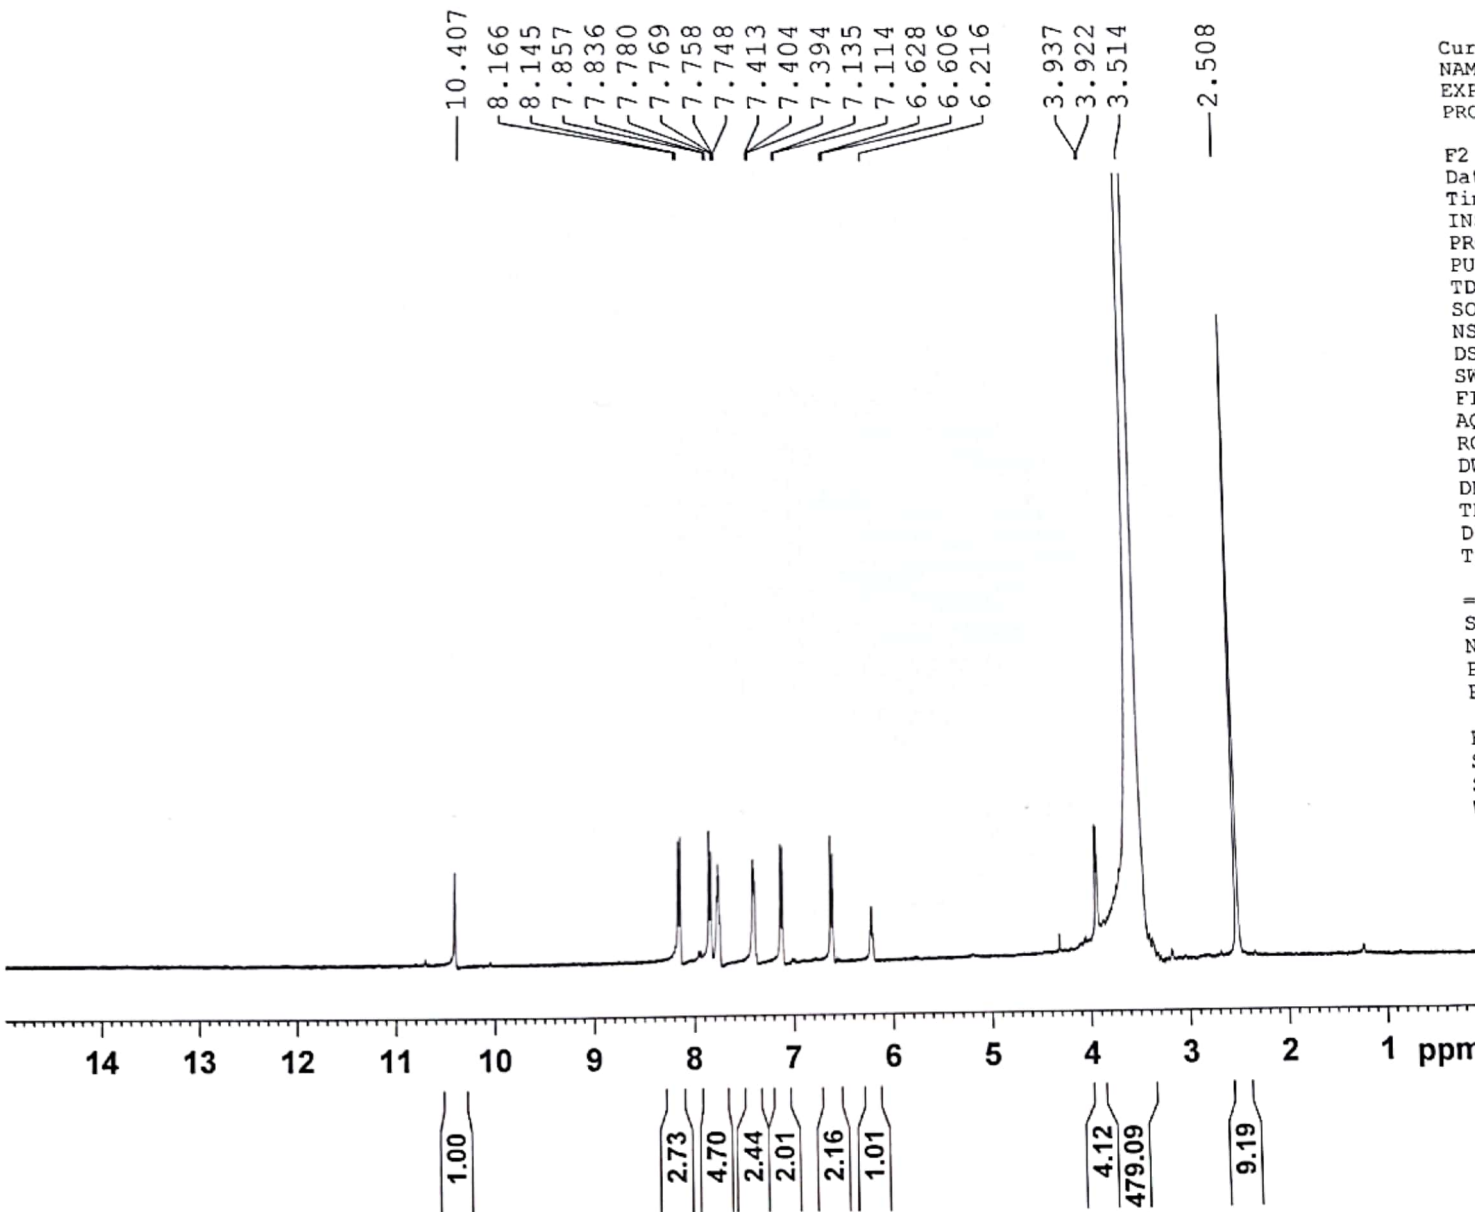

Current Data Parameters  
NAME Jul15-2015-nmr  
EXPNO 231  
PROCNO 1

F2 - Acquisition Parameters  
Date\_ 20150718  
Time\_ 7.40  
INSTRUM spect  
PROBHD 5 mm PABBO BB/  
PULPROG zg30  
TD 65536  
SOLVENT DMSO  
NS 16  
DS 2  
SWH 8012.820 Hz  
FIDRES 0.122266 Hz  
AQ 4.0894465 sec  
RG 91.28  
DW 62.400 usec  
DE 6.50 usec  
TE 298.1 K  
D1 1.00000000 sec  
TDO 1

===== CHANNEL f1 =====  
SF01 400.1324710 MHz  
NUC1 1H  
P1 10.00 usec  
PLW1 16.00000000 W

F2 - Processing parameters  
SI 65536  
SF 400.1300000 MHz  
WDW EM  
SSB 0  
LB 0.10 Hz  
GB 0  
PC 1.00

HEBA-14C  
PROTON\_BSU DMSO {C:\data} nmr 7

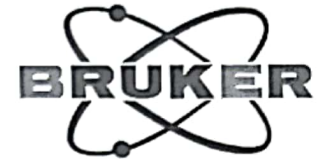

Current Data Parameters  
NAME Jul15-2015-nmr  
EXPNO 231  
PROCNO 1

F2 - Acquisition Parameters  
Date\_ 20150718  
Time 7.40  
INSTRUM spect  
PROBHD 5 mm PABBO BB/  
PULPROG zg30  
TD 65536  
SOLVENT DMSO  
NS 16  
DS 2  
SWH 8012.820 Hz  
FIDRES 0.122266 Hz  
AQ 4.0894465 sec  
RG 91.28  
DW 62.400 usec  
DE 6.50 usec  
TE 298.1 K  
D1 1.00000000 sec  
TDO 1

==== CHANNEL f1 =====  
SFO1 400.1324710 MHz  
NUC1 1H  
P1 10.00 usec  
PLW1 16.00000000 W

F2 - Processing parameters  
SI 65536  
SF 400.1300000 MHz  
WDW EM  
SSB 0  
LB 0.10 Hz  
GB 0  
PC 1.00

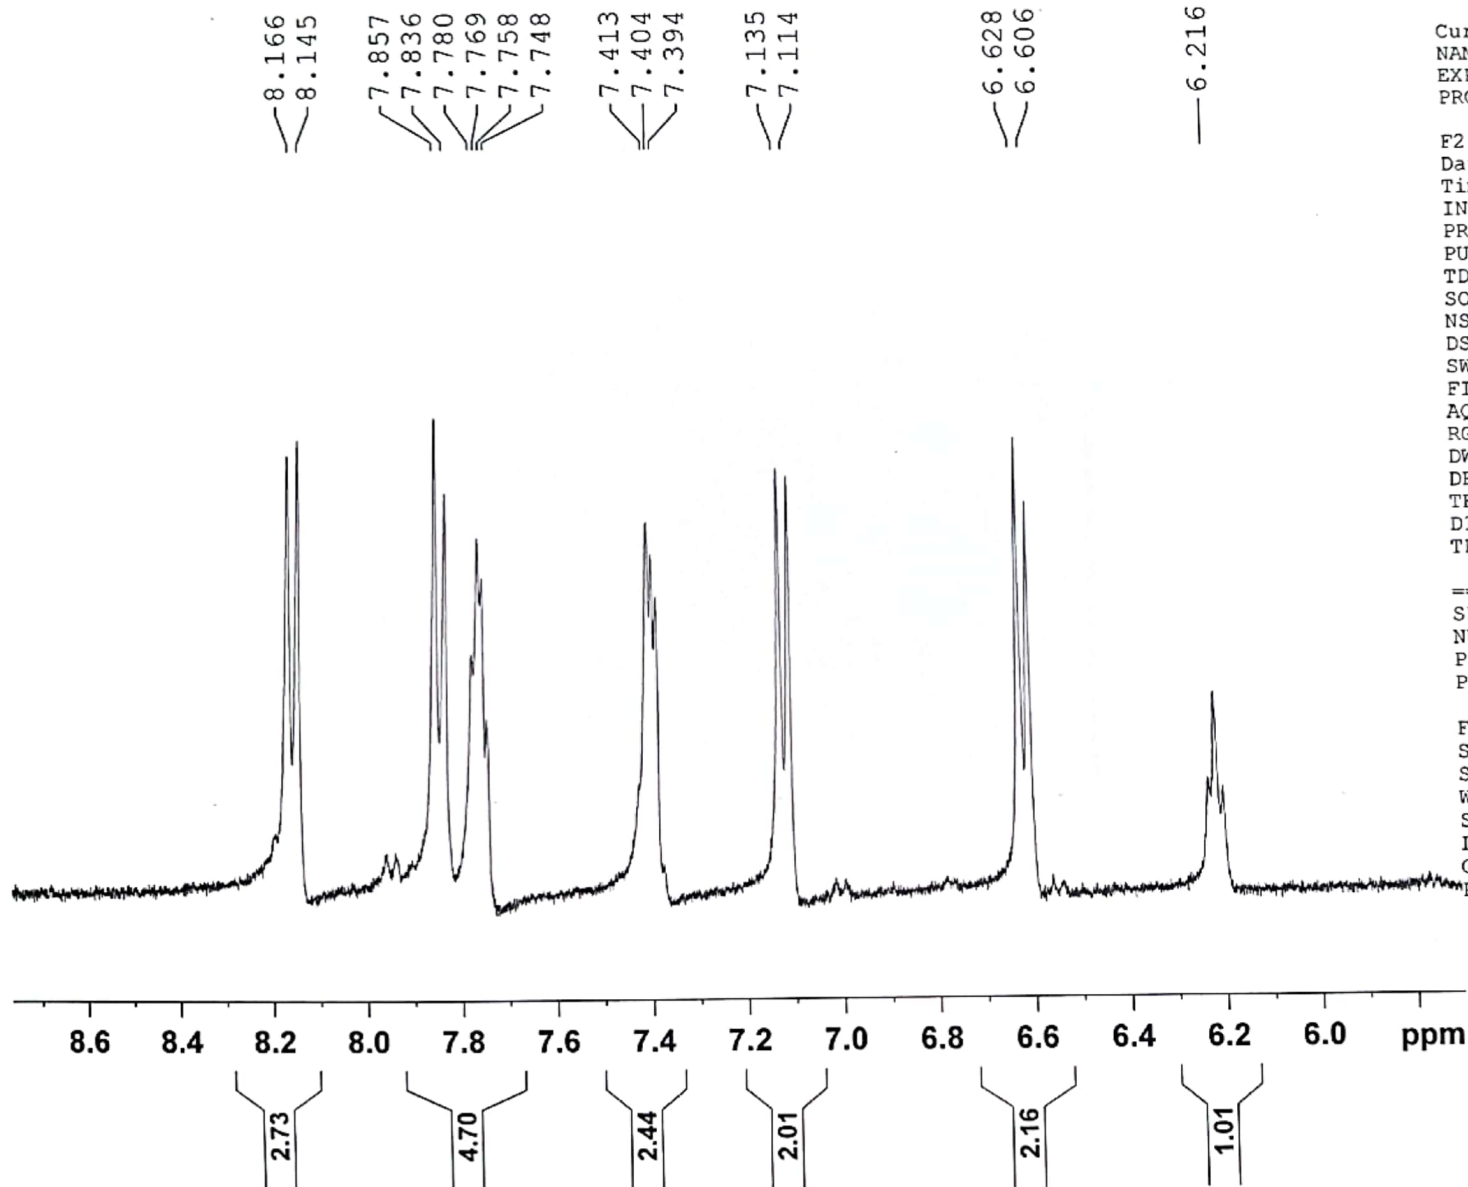

HEBA-14C  
DEPTQ-BSU DMSO {C:\data} nmr 7

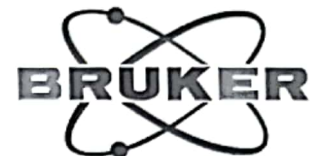

170.15  
162.64  
150.56  
147.68  
142.51  
142.01  
129.07  
128.73  
125.73  
125.32  
121.43  
119.99  
119.87  
114.16  
111.25

47.61  
40.43  
40.22  
40.01  
39.80  
39.59  
39.38  
39.18

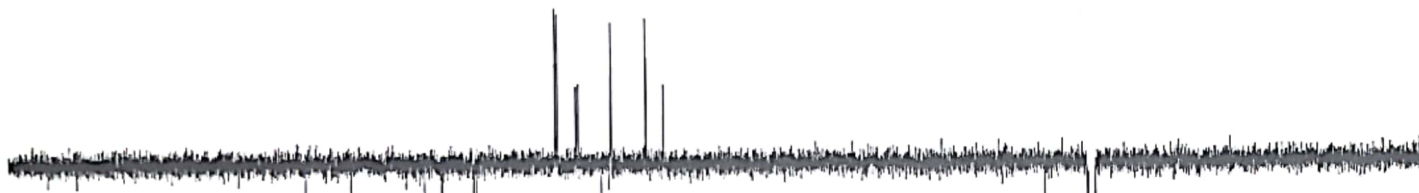

Current Data Parameters  
NAME Jul15-2015-nmr  
EXPNO 230  
PROCNO 1

F2 - Acquisition Parameters  
Date\_ 20150718  
Time 7.37  
INSTRUM spect  
PROBHD 5 mm PABBO BB/  
PULPROG deptqgppsp  
TD 65536  
SOLVENT DMSO  
NS 4000  
DS 4  
SWH 24038.461 Hz  
FIDRES 0.366798 Hz  
AQ 1.3631488 sec  
RG 205.44  
DW 20.800 usec  
DE 6.50 usec  
TE 298.2 K  
CNST2 145.0000000  
CNST12 1.5000000  
D1 2.0000000 sec  
D2 0.00344828 sec  
D12 0.00002000 sec  
D16 0.00002000 sec  
TD0 1

===== CHANNEL f1 =====  
SFO1 100.6228303 MHz  
NUC1 13C  
P1 10.00 usec  
P13 2000.00 usec  
PLW0 0 W  
PLW1 66.00000000 W  
SPNAM[5] Crp60comp.4  
SPOAL5 0.500  
SPOFFS5 0 Hz  
SPW5 10.08399963 W

===== CHANNEL f2 =====  
SFO2 400.1312797 MHz  
NUC2 1H  
CPDPRG[2] waltz16  
P0 15.75 usec  
P3 10.50 usec  
P4 21.00 usec  
PCPD2 90.00 usec  
PLW2 16.00000000 W  
PLW12 0.21777999 W

===== GRADIENT CHANNEL =====  
GPNAM[1] SMSQ10.100  
GPNAM[2] SMSQ10.100  
GPNAM[3] SMSQ10.100  
GPZ1 31.00 %  
GPZ2 31.00 %  
GPZ3 31.00 %  
P16 1000.00 usec

F2 - Processing parameters  
SI 32768  
SF 100.6127690 MHz  
WDW EM  
SSB 0  
LB 1.00 Hz  
GB 0  
PC 1.40

200 180 160 140 120 100 80 60 40 20 0 ppm

HEBA-14C  
DEPTQ-BSU DMSO {C:\data} nmr 7

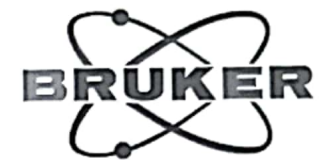

Current Data Parameters  
NAME Jul15-2015-nmr  
EXPNO 230  
PROCNO 1

F2 - Acquisition Parameters  
Date\_ 20150718  
Time 7.37  
INSTRUM spect  
PROBHD 5 mm PABBO BB/  
PULPROG deptqqpsp  
TD 65536  
SOLVENT DMSO  
NS 4000  
DS 4  
SWH 24038.461 Hz  
FIDRES 0.366798 Hz  
AQ 1.3631488 sec  
RG 205.44  
DW 20.800 usec  
DE 6.50 usec  
TE 298.2 K  
CNST2 145.000000  
CNST12 1.500000  
D1 2.0000000 sec  
D2 0.00344828 sec  
D12 0.00002000 sec  
D16 0.00020000 sec  
TDO 1

----- CHANNEL f1 -----  
SFO1 100.6228303 MHz  
NUC1 13C  
P1 10.00 usec  
P13 2000.00 usec  
PLW0 0 W  
PLW1 66.00000000 W  
SPNAM[5] Crp60comp.4  
SPOALS 0.500  
SPOFFS5 0 Hz  
SPW5 10.08399963 W

----- CHANNEL f2 -----  
SFO2 400.1312797 MHz  
NUC2 1H  
CPDPRG[2] waltz16  
P0 15.75 usec  
P3 10.50 usec  
P4 21.00 usec  
PCPD2 90.00 usec  
PLW2 16.00000000 W  
PLW12 0.21777999 W

----- GRADIENT CHANNEL -----  
GPNAM[1] SMSQ10.100  
GPNAM[2] SMSQ10.100  
GPNAM[3] SMSQ10.100  
GP21 31.00 t  
GP22 31.00 t  
GP23 31.00 t  
P16 1000.00 usec

F2 - Processing parameters  
SI 32768  
SF 100.6127690 MHz  
WDW EM  
SSB 0  
LB 1.00 Hz  
GB 0  
PC 1.40

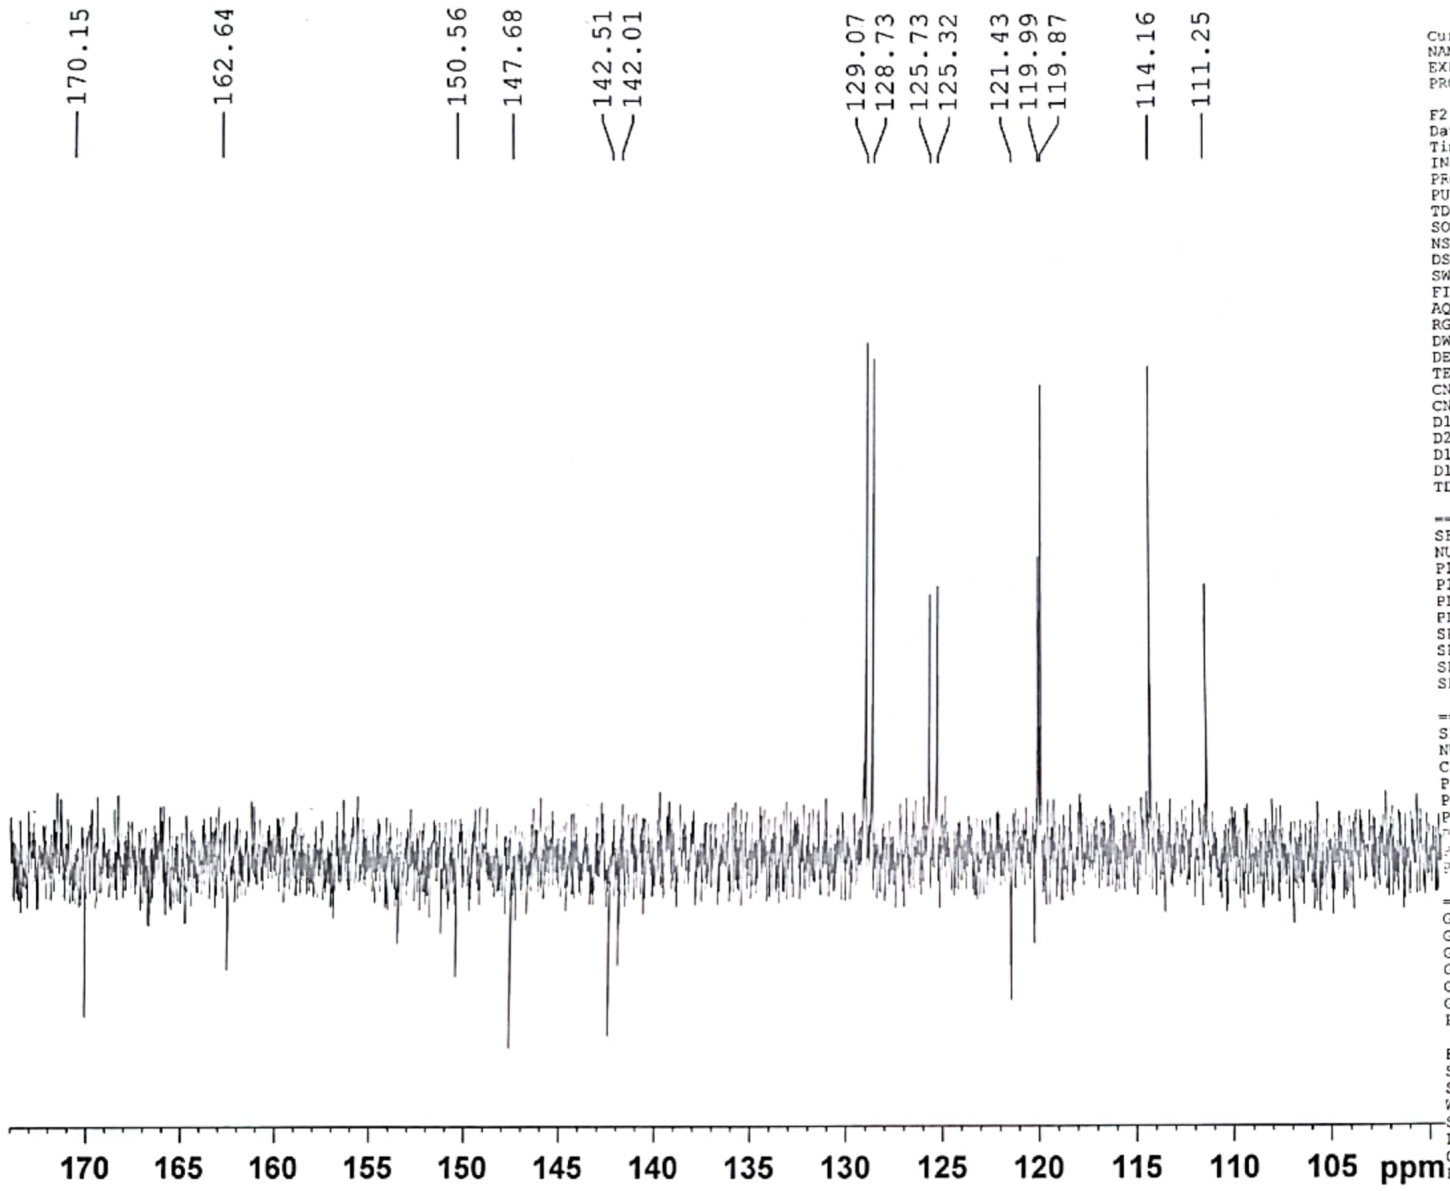

RT: 0.14 - 3.22 SM: 15B

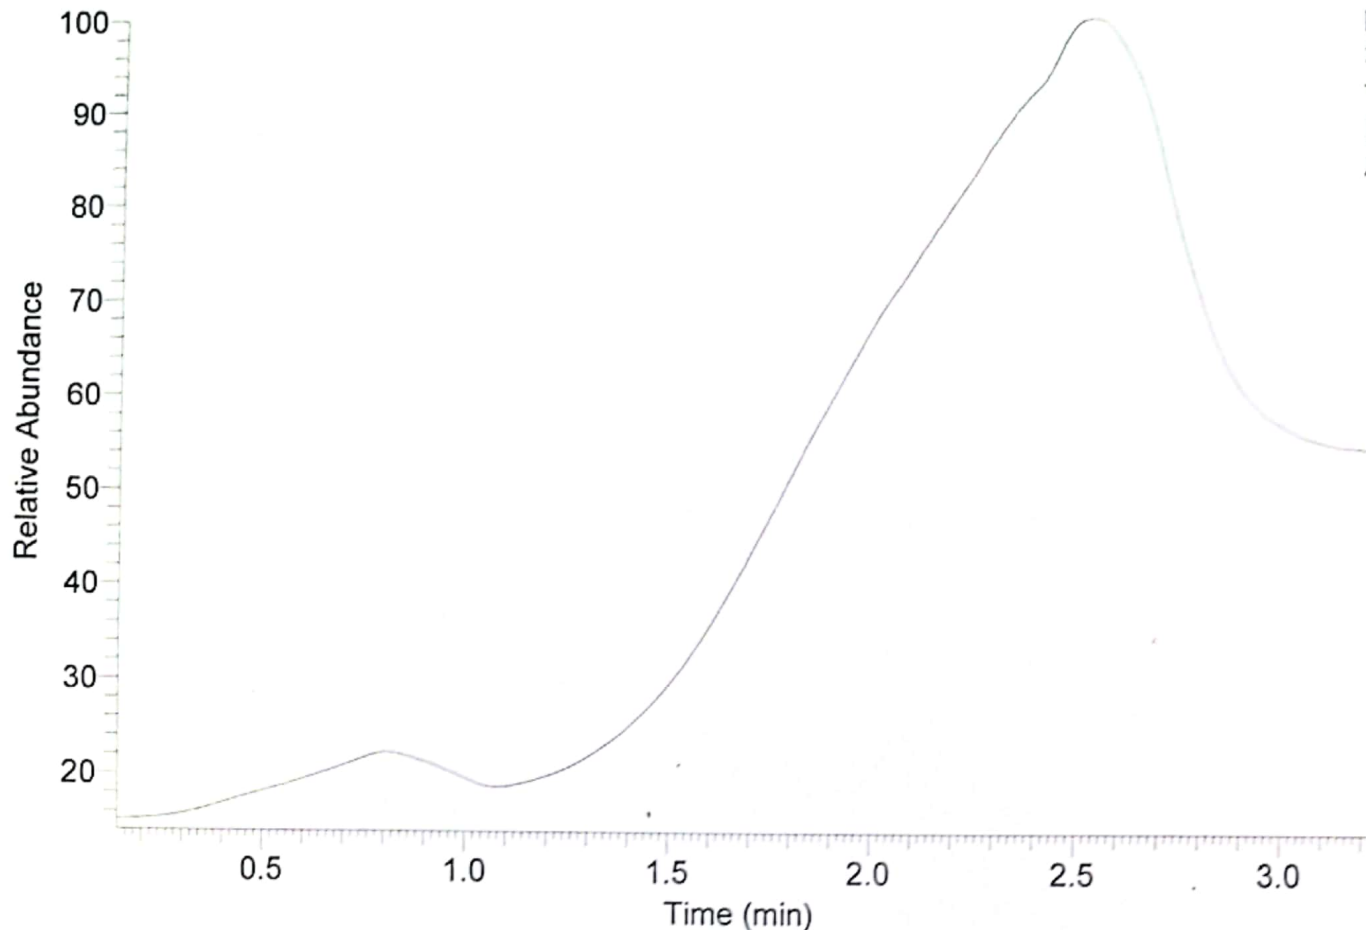

NL:  
3.46E8  
TIC MS  
HEBA-  
ATEF-14C

HEBA-ATEF-14C #280 RT: 4.70 AV: 1 SB: 17 4.75-4.90, 4.75-4.85 NL: 5.32E5  
T: {0,0} + c EI Full ms [40.00-1000.00]

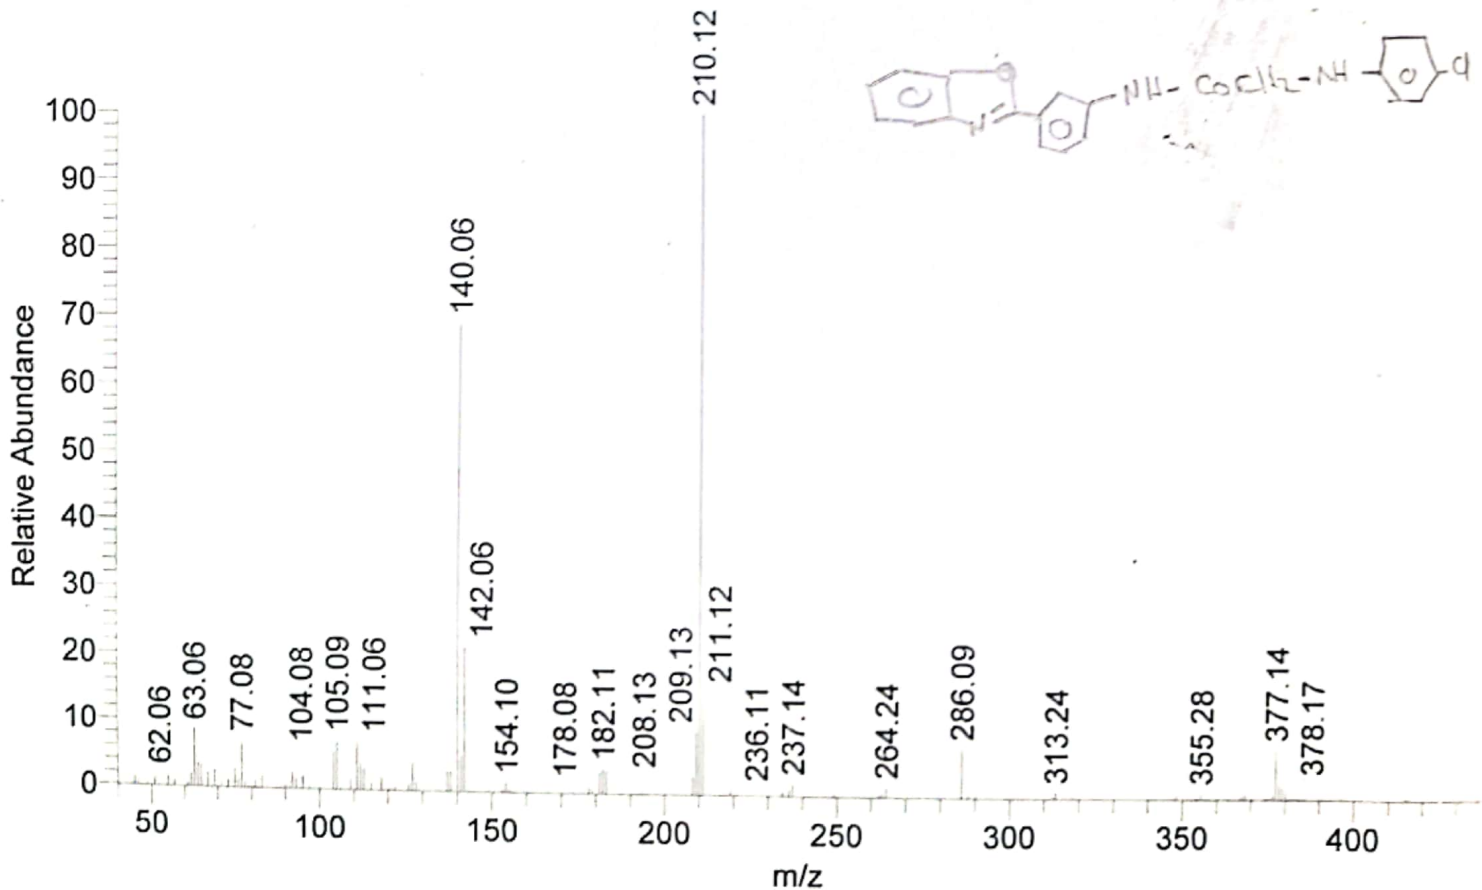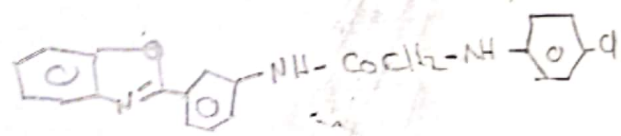

HEBA-ATEF-14C#280 RT: 4.70  
 SB: 17 4.75-4.90 , 4.75-4.85  
 T: (0,0) + c EI Full ms [40.00-1000.00]  
 m/z = 40.00-437.64

| m/z    | Intensity | Relative |
|--------|-----------|----------|
| 45.07  | 6768.7    | 1.27     |
| 51.07  | 6430.1    | 1.21     |
| 55.08  | 8617.3    | 1.62     |
| 57.10  | 5261.2    | 0.99     |
| 62.06  | 9781.4    | 1.84     |
| 63.06  | 45728.4   | 8.60     |
| 64.06  | 17917.9   | 3.37     |
| 65.07  | 17073.4   | 3.21     |
| 67.09  | 11662.2   | 2.19     |
| 69.08  | 14534.2   | 2.73     |
| 71.10  | 4813.0    | 0.91     |
| 73.06  | 5816.0    | 1.09     |
| 75.05  | 14686.1   | 2.76     |
| 76.06  | 6406.4    | 1.20     |
| 77.08  | 37069.7   | 6.97     |
| 78.07  | 4880.4    | 0.92     |
| 81.10  | 6430.6    | 1.21     |
| 83.10  | 9006.6    | 1.69     |
| 92.06  | 11952.3   | 2.25     |
| 93.09  | 7755.5    | 1.46     |
| 95.11  | 10386.9   | 1.95     |
| 104.08 | 29514.4   | 5.55     |
| 105.09 | 38490.3   | 7.24     |
| 109.12 | 8033.4    | 1.51     |
| 111.06 | 37508.6   | 7.05     |
| 112.07 | 20904.3   | 3.93     |
| 113.06 | 17109.6   | 3.22     |
| 115.09 | 5426.9    | 1.02     |
| 118.10 | 9903.0    | 1.86     |
| 126.09 | 4835.4    | 0.91     |
| 127.07 | 21613.1   | 4.07     |
| 128.10 | 6662.5    | 1.25     |
| 137.08 | 15344.6   | 2.89     |
| 138.07 | 15234.3   | 2.87     |
| 140.06 | 365521.8  | 68.75    |
| 141.08 | 27620.5   | 5.19     |
| 142.06 | 113742.6  | 21.39    |
| 154.10 | 7168.9    | 1.35     |
| 178.08 | 5430.7    | 1.02     |
| 181.11 | 16279.0   | 3.06     |
| 182.11 | 19056.0   | 3.58     |
| 183.11 | 17278.5   | 3.25     |
| 208.13 | 14047.1   | 2.64     |
| 209.13 | 49876.3   | 9.38     |
| 210.12 | 531679.2  | 100.00   |
| 211.12 | 82355.6   | 15.49    |
| 236.11 | 4276.6    | 0.80     |
| 237.14 | 9716.8    | 1.83     |
| 264.24 | 7759.8    | 1.46     |
| 286.09 | 38787.3   | 7.30     |
| 313.24 | 4495.5    | 0.85     |
| 355.28 | 4336.9    | 0.82     |
| 368.28 | 3957.9    | 0.74     |



HEBA-A-TEF-14C#280 RT: 4.70  
SB: 17 4.75-4.90 , 4.75-4.85  
T: {0,0} + c EI Full ms [40.00-1000.00]  
m/z= 40.00-437.64

| m/z    | Intensity | Relative |
|--------|-----------|----------|
| 377.14 | 38752.7   | 7.29     |
| 378.17 | 12105.5   | 2.28     |
| 379.15 | 9416.4    | 1.77     |
| 380.14 | 5266.6    | 0.99     |
